# Supplementary material
Source: MDPI journal article supplement (https://www.mdpi.com/2304-6740/10/12/254)
Supplement: s1 [file s1]

## Table of Contents

|                                       |    |
|---------------------------------------|----|
| Experimental.....                     | 2  |
| Crystallographic Data.....            | 4  |
| Interatomic distances and Angles..... | 9  |
| Powder Diffraction .....              | 19 |
| Photophysical Properties .....        | 25 |
| IR Spectra .....                      | 46 |

# Experimental

## Spectroscopic Investigations

**Vibrational spectra** were recorded from 2–5 milligrams of the compounds with an ALPHA FT-IR spectrometer from Bruker optics (ATR module) using OPUS software.

**Absorption Spectra** were measured on solid-state products using a standard Agilent Cary 5000 UV-VIS-NIR spectrophotometer with a Praying Mantis accessory, which had been mounted and aligned for use with the DRP-ASC ambient chamber. The source, detector, and grating changeovers were at the standard position of 350, 800, and 800 nm, respectively, for all studied compounds except  $\mu$ [Nd(2-PyPzH)<sub>2</sub>Cl<sub>3</sub>] (**2**) and [Dy(2-PyPzH)<sub>2</sub>Cl<sub>3</sub>] (**13**), the detector and grating changeovers were set to 850 nm. For  $\mu$ [Nd(2-PyPzH)<sub>2</sub>Cl<sub>3</sub>] (**2**),  $\beta$ -[Sm<sub>2</sub>(2-PyPzH)<sub>4</sub>Cl<sub>6</sub>] (**8**), and [Ce(2-PyPzH)<sub>3</sub>Cl<sub>3</sub>] (**11**), the source has been set to 380, 330, and 320 nm, respectively. The reference spectrum was collected on PTFE and the reference and samples were packed in the ambient chamber within the glovebox under inert conditions. Water has absorption bands in the NIR region at around 1370 and 1850 nm, which interferes with the absorption of our Ln<sup>3+</sup> ions. In order to avoid these interferences, we carried out the measurements up to 1300 nm.

**Photoluminescence spectra** were recorded for ground solid samples after filling them in quartz glass tubes under argon. Measurements were performed at room temperature as well as 77 K (the latter using the liquid nitrogen-filled assembly FL-1013 of HORIBA) with a HORIBA Jobin Yvon Spex Fluorolog 3 spectrometer equipped with a 450 W Xe short-arc lamp (USHIO), double-grated excitation, emission monochromators, and a photomultiplier tube (R928P) using the FluoroEssence™ software. Excitation and emission spectra were corrected for the spectral response of the monochromators and detector using spectral corrections provided by the constructor. In addition, a photodiode reference detector was used to correct the excitation spectra for the spectral distribution of the lamp intensity. An R5509-73 detector was used to collect the data in the NIR region. When needed, data collection was performed using an edge filter (Newport 20CGA-345, 395, 495 for the visible range and Reichmann Optics RG 830 longpass for the NIR range). Emission spectra with gating were recorded using a xenon flashlamp with a pulse repetition rate of 41 ms.

Photoluminescence overall decay process times were determined using the aforementioned HORIBA Jobin Yvon Spex Fluorolog 3 spectrometer equipped with a dual lamp housing (FL-1040A), a UV-xenon flashlamp (Exelitas FX-1102), and a TCSPC (time-correlated single-photon counting) upgrade, or pulsed picosecond laser diode. Emission decays were recorded using DataStation software. Exponential tail fitting was used to calculate the resulting intensity decay using Decay Analysis Software 6. The quality of the fit was confirmed by  $\chi^2$  values being below 1.2.

Photoluminescence quantum yields were determined using a second similar instrument HORIBA Jobin Yvon Spex Fluorolog 3 spectrometer equipped with a HORIBA Quanta- $\phi$  Integrating Sphere. For the measurements, solid samples were filled into Starna Micro Cell cuvettes 18-F/ST/C/Q/10 (fluorescence with ST/C closed-cap, material UV quartz glass Spectrosil Q, pathlength 10 mm, matched). Magnesium oxide was used as reference material. Each sample was measured at least three times and then the quantum yield values with standard deviation were evaluated. The Quanta- $\phi$  Integrating Sphere was checked with a standard (sodium salicylate as a powder,  $\lambda_{\text{ex}}$  = 340 nm,  $\lambda_{\text{em}}$  = 365–600 nm, measured QY = 52%, literature: 53%) [77].

## Thermal analysis

Simultaneous DTA/TG (NETZSCH STA 409-PC) coupled to a mass spectrometer (NETZSCH QMS 403 Aëolos) in a constant argon flow of  $50 \text{ mL}\cdot\text{min}^{-1}$  with a heating rate of  $5 \text{ K}\cdot\text{min}^{-1}$  from room temperature to  $1000^\circ\text{C}$  was used to determine the thermal properties. The DTA curve was baseline-corrected after the measurement using the Origin™ software.

## CHN analysis

A Thermo Scientific Flash EA-1112 was used to perform the CHN analyses. The samples were placed in a tin crucible with at least one mass equivalent of  $\text{V}_2\text{O}_5$ . The samples were prepared and stored under inert conditions until the measurements.

## Synthesis of (1H-pyrazol-3-yl)pyridines, the general method

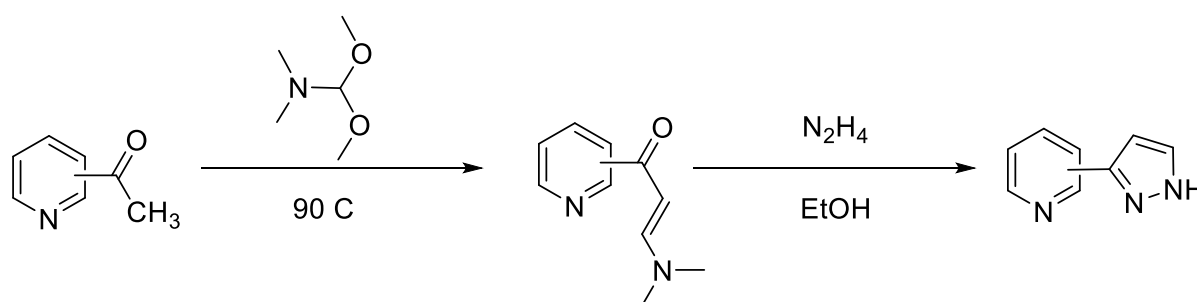

A mixture of acetylpyridine (15g, 124 mmol) and DMF-DMA (30mL, 26.9g, 225 mmol) was stirred at  $90^\circ\text{C}$  using an oil bath. MeOH was removed *via* a short Vigreux column (10 cm) with an attached descending condenser. The reaction was stopped as soon as the distillation of MeOH ceased (7–8 h) and the mixture was cooled to room temperature overnight. Afterward, 30 mL of hexane was added and the resulting suspension was stirred for 30 min and then filtered. All solids were dried to a constant weight and were used without further purification. The products are darkening under atmospheric conditions and should be used shortly after preparation or stored in a freezer at  $-18^\circ\text{C}$ .

### (E/Z)-3-(dimethylamino)-1-(pyridin-2-yl)prop-2-en-1-one.

To a stirred warm ( $40^\circ\text{C}$ ) solution of 19.3 g (110 mmol) of the corresponding aminoketone in 150 mL of 96% ethanol  $\text{N}_2\text{H}_4\cdot\text{H}_2\text{O}$  (100%, 8 mL, 160 mmol) was added in one portion and the resulting mixture was refluxed for 6 h with gentle stirring and then cooled to room temperature. Yellow crystals with a yield of 19.6 g (89%) were obtained. Further separation of (1H-pyrazol-3-yl)pyridines was varied for different isomers.

### 2-(1H-pyrazol-3-yl)pyridine / 3-(2-pyridyl)pyrazole (2-PyPzH)

The cooled reaction mixture was dried under diminished pressure and the resulting solid was dissolved in 200mL of  $\text{CHCl}_3$ . The organic solution was washed twice by 20 mL portions of brine, dried over  $\text{MgSO}_4$ , and the solvent was evaporated. The resulting solid was suspended in 20 mL of hexane, filtered, and the crystals were dried. The yield is 12.8 g (80%) of yellow solid. M.p.  $118\text{--}119^\circ\text{C}$  (lit.  $119\text{--}120^\circ\text{C}$ ).

$^1\text{H}$  NMR (300 MHz,  $\text{CDCl}_3$ )  $\delta$  11.24 (br. s, 1H), 8.54 (d,  $J = 4.7 \text{ Hz}$ , 1H), 7.78 (t,  $J = 8.1 \text{ Hz}$ , 1H), 7.31 (d,  $J = 7.7 \text{ Hz}$ , 1H), 7.60 (d,  $J = 2.4 \text{ Hz}$ , 1H), 7.06 (t,  $J = 5.6 \text{ Hz}$ , 1 H), 6.78 (s, 1H).

## Crystallographic Data

CCDC 2208098 (1), 2208099 (2), 2208100 (3), 2208101 (5), 2208102 (6), 2208103 (7), 2208104 (8), 2208105 (9), 2208106 (10), 2208107 (11), 2208108 (12), 2208109 (13), 2208110 (14), 2208111 (15), 2208112 (16), 2208113 (17), 2208114 (18) contain the supplementary crystallographic data. These data are provided free of charge by the Cambridge Crystallographic Data Centre.

**Table S1.** Crystallographic data of  $\text{[Ln}_2\text{(2-PyPzH)}_4\text{Cl}_6\text{]}$ , Ln = La (1), Nd (2), and Sm (3).

| Compound                                                                                      | $\text{[La}_2\text{(2-PyPzH)}_4\text{Cl}_6\text{]}$        | $\text{[Nd}_2\text{(2-PyPzH)}_4\text{Cl}_6\text{]}$        | $\text{[Sm}_2\text{(2-PyPzH)}_4\text{Cl}_6\text{]}$        |
|-----------------------------------------------------------------------------------------------|------------------------------------------------------------|------------------------------------------------------------|------------------------------------------------------------|
| CCDC number                                                                                   | 2208098                                                    | 2208099                                                    | 2208100                                                    |
| Empirical formula                                                                             | $\text{C}_{16}\text{H}_{14}\text{N}_6\text{Cl}_3\text{La}$ | $\text{C}_{16}\text{H}_{14}\text{N}_6\text{Cl}_3\text{Nd}$ | $\text{C}_{16}\text{H}_{14}\text{N}_6\text{Cl}_3\text{Sm}$ |
| $M_r / \text{g}\cdot\text{mol}^{-1}$                                                          | 535.59                                                     | 540.92                                                     | 547.03                                                     |
| $T / \text{K}$                                                                                | 100(2)                                                     | 200(2)                                                     | 100(2)                                                     |
| $\lambda / \text{pm}$                                                                         | 71.073,<br>Mo-K $\alpha$                                   | 71.073,<br>Mo-K $\alpha$                                   | 71.073,<br>Mo-K $\alpha$                                   |
| Crystal system                                                                                | Monoclinic                                                 | Monoclinic                                                 | Monoclinic                                                 |
| Space group                                                                                   | $C2/c$                                                     | $C2/c$                                                     | $C2/c$                                                     |
| $a / \text{pm}$                                                                               | 2033.6(1)                                                  | 2031.3(1)                                                  | 1993.4(1)                                                  |
| $b / \text{pm}$                                                                               | 1190.2(1)                                                  | 1186.3(1)                                                  | 1192.3(1)                                                  |
| $c / \text{pm}$                                                                               | 2489.7(2)                                                  | 2466.6(2)                                                  | 2449.5(1)                                                  |
| $\alpha / ^\circ$                                                                             | 90                                                         | 90                                                         | 90                                                         |
| $\beta / ^\circ$                                                                              | 92.802(2)                                                  | 92.326(2)                                                  | 92.519(2)                                                  |
| $\gamma / ^\circ$                                                                             | 90                                                         | 90                                                         | 90                                                         |
| $V / 10^6 \text{pm}^3$                                                                        | 6018.7(5)                                                  | 5939.0(6)                                                  | 5816.5(5)                                                  |
| $Z$                                                                                           | 12                                                         | 12                                                         | 12                                                         |
| $\rho_{\text{calc}} / \text{g}\cdot\text{cm}^{-3}$                                            | 1.773                                                      | 1.815                                                      | 1.874                                                      |
| $\mu / \text{mm}^{-1}$                                                                        | 2.541                                                      | 3.040                                                      | 3.455                                                      |
| $F(000)$                                                                                      | 3120                                                       | 3156                                                       | 3180                                                       |
| Crystal size / $\text{mm}^3$                                                                  | 0.059 x 0.035 x<br>0.031                                   | 0.172 x 0.114 x 0.077                                      | 0.604 x 0.108 x 0.082                                      |
| $\theta_{\text{min}} / ^\circ$                                                                | 1.983                                                      | 2.007                                                      | 2.175                                                      |
| $\theta_{\text{max}} / ^\circ$                                                                | 27.589                                                     | 30.582                                                     | 26.731                                                     |
| Reflections collected                                                                         | 214731                                                     | 62094                                                      | 58706                                                      |
| Independent reflections                                                                       | 6998                                                       | 9066                                                       | 6173                                                       |
| $R(\text{int})$                                                                               | 0.0613                                                     | 0.1365                                                     | 0.0756                                                     |
| No. Of parameters                                                                             | 454                                                        | 430                                                        | 442                                                        |
| GOF                                                                                           | 1.119                                                      | 0.990                                                      | 1.166                                                      |
| Final $R$ indices [ $I > 2\sigma(I)$ ]                                                        | $R_1 = 0.0319$ , $wR_2 =$<br>0.0752                        | $R_1 = 0.0450$ , $wR_2 =$<br>0.0651                        | $R_1 = 0.0445$ ,<br>$wR_2 = 0.0789$                        |
| $R$ indices (all data)                                                                        | $R_1 = 0.0403$ , $wR_2 =$<br>0.0794                        | $R_1 = 0.0938$ , $wR_2 =$<br>0.0753                        | $R_1 = 0.0574$ ,<br>$wR_2 = 0.0819$                        |
| $\Delta\rho_{\text{max}}, \Delta\rho_{\text{min}} / \text{e}\cdot 10^{-6}\cdot\text{pm}^{-3}$ | 2.571, -1.170                                              | 1.115, -1.334                                              | 2.160, -2.454                                              |

**Table S2.** Crystallographic data of  $\alpha$ -[Ln<sub>2</sub>(2-PyPzH)<sub>4</sub>Cl<sub>6</sub>], Ln = Eu (5), Gd (6), and Tb (7).

| Compound                                                                                     | $\alpha$ -[Eu <sub>2</sub> (2-PyPzH) <sub>4</sub> Cl <sub>6</sub> ] | $\alpha$ -[Gd <sub>2</sub> (2-PyPzH) <sub>4</sub> Cl <sub>6</sub> ] | $\alpha$ -[Tb <sub>2</sub> (2-PyPzH) <sub>4</sub> Cl <sub>6</sub> ] |
|----------------------------------------------------------------------------------------------|---------------------------------------------------------------------|---------------------------------------------------------------------|---------------------------------------------------------------------|
| CCDC number                                                                                  | 2208101                                                             | 2208102                                                             | 2208103                                                             |
| Empirical formula                                                                            | C <sub>16</sub> H <sub>14</sub> N <sub>6</sub> Cl <sub>3</sub> Eu   | C <sub>16</sub> H <sub>14</sub> N <sub>6</sub> Cl <sub>3</sub> Gd   | C <sub>16</sub> H <sub>14</sub> N <sub>6</sub> Cl <sub>3</sub> Tb   |
| $M_r$ / g·mol <sup>-1</sup>                                                                  | 548.64                                                              | 553.93                                                              | 555.60                                                              |
| $T$ / K                                                                                      | 100(2)                                                              | 100(2)                                                              | 100(2)                                                              |
| $\lambda$ / pm                                                                               | 71.073,<br>Mo-K $\alpha$                                            | 71.073<br>Mo-K $\alpha$                                             | 71.073,<br>Mo-K $\alpha$                                            |
| Crystal system                                                                               | Monoclinic                                                          | Monoclinic                                                          | Monoclinic                                                          |
| Space group                                                                                  | $P2_1/c$                                                            | $P2_1/c$                                                            | $P2_1/c$                                                            |
| $a$ / pm                                                                                     | 811.5(1)                                                            | 809.1(1)                                                            | 809.5(1)                                                            |
| $b$ / pm                                                                                     | 2380.2(2)                                                           | 2376.4(2)                                                           | 2368.7(1)                                                           |
| $c$ / pm                                                                                     | 1055.4(1)                                                           | 1053.3(1)                                                           | 1054.2(1)                                                           |
| $\alpha$ / °                                                                                 | 90                                                                  | 90                                                                  | 90                                                                  |
| $\beta$ / °                                                                                  | 112.34(1)                                                           | 112.19(1)                                                           | 112.437(1)                                                          |
| $\gamma$ / °                                                                                 | 90                                                                  | 90                                                                  | 90                                                                  |
| $V$ / 10 <sup>6</sup> pm <sup>3</sup>                                                        | 1885.6(2)                                                           | 1875.2(3)                                                           | 1868.31(9)                                                          |
| $Z$                                                                                          | 4                                                                   | 4                                                                   | 4                                                                   |
| $\rho_{\text{calc}}$ / g·cm <sup>-3</sup>                                                    | 1.933                                                               | 1.962                                                               | 1.975                                                               |
| $\mu$ / mm <sup>-1</sup>                                                                     | 3.764                                                               | 3.977                                                               | 4.227                                                               |
| F(000)                                                                                       | 1064                                                                | 1068                                                                | 1072                                                                |
| Crystal size / mm <sup>3</sup>                                                               | 0.035 x 0.033 x 0.032                                               | 0.067 x 0.038 x 0.023                                               | 0.423 x 0.376 x 0.152                                               |
| $\theta_{\text{min}}$ / °                                                                    | 2.255                                                               | 2.257                                                               | 2.260                                                               |
| $\theta_{\text{max}}$ / °                                                                    | 26.020                                                              | 27.136                                                              | 37.032                                                              |
| Reflections collected                                                                        | 33885                                                               | 46710                                                               | 122560                                                              |
| Independent reflections                                                                      | 3695                                                                | 4156                                                                | 9509                                                                |
| $R(\text{int})$                                                                              | 0.0781                                                              | 0.0956                                                              | 0.0573                                                              |
| No. Of parameters                                                                            | 299                                                                 | 329                                                                 | 235                                                                 |
| GOF                                                                                          | 1.048                                                               | 1.054                                                               | 1.112                                                               |
| Final $R$ indices [ $I > 2\sigma(I)$ ]                                                       | $R_1 = 0.0326$ , $wR_2 = 0.0638$                                    | $R_1 = 0.0409$ , $wR_2 = 0.0895$                                    | $R_1 = 0.0241$ , $wR_2 = 0.0500$                                    |
| $R$ indices (all data)                                                                       | $R_1 = 0.0511$ , $wR_2 = 0.0724$                                    | $R_1 = 0.0694$ , $wR_2 = 0.1066$                                    | $R_1 = 0.0331$ , $wR_2 = 0.0524$                                    |
| $\Delta\rho_{\text{max}}$ , $\Delta\rho_{\text{min}}$ / e·10 <sup>-6</sup> ·pm <sup>-3</sup> | 2.119, -1.824                                                       | 3.501, -2.013                                                       | 1.961, -1.527                                                       |

**Table S3.** Crystallographic data of  $\beta$ -[Ln<sub>2</sub>(2-PyPzH)<sub>4</sub>Cl<sub>6</sub>], Ln = Sm (8), Eu (9), Gd (10) and [Ce(2-PyPzH)<sub>3</sub>Cl<sub>3</sub>] (11).

| Compound                                                                                    | $\beta$ -[Sm <sub>2</sub> (2-PyPzH) <sub>4</sub> Cl <sub>6</sub> ] | $\beta$ -[Eu <sub>2</sub> (2-PyPzH) <sub>4</sub> Cl <sub>6</sub> ] | $\beta$ -[Gd <sub>2</sub> (2-PyPzH) <sub>4</sub> Cl <sub>6</sub> ] | [Ce(2-PyPzH) <sub>3</sub> Cl <sub>3</sub> ]                       |
|---------------------------------------------------------------------------------------------|--------------------------------------------------------------------|--------------------------------------------------------------------|--------------------------------------------------------------------|-------------------------------------------------------------------|
| CCDC number                                                                                 | 2208104                                                            | 2208105                                                            | 2208106                                                            | 2208107                                                           |
| Empirical formula                                                                           | C <sub>16</sub> H <sub>14</sub> N <sub>6</sub> Cl <sub>3</sub> Sm  | C <sub>16</sub> H <sub>14</sub> N <sub>6</sub> Cl <sub>3</sub> Eu  | C <sub>16</sub> H <sub>14</sub> N <sub>6</sub> Cl <sub>3</sub> Gd  | C <sub>24</sub> H <sub>21</sub> N <sub>9</sub> Cl <sub>3</sub> Ce |
| $M_r$ / g·mol <sup>-1</sup>                                                                 | 547.03                                                             | 548.64                                                             | 553.93                                                             | 681.97                                                            |
| $T$ / K                                                                                     | 100(2)                                                             | 100(2)                                                             | 100(2)                                                             | 100(2)                                                            |
| $\lambda$ / pm                                                                              | 71.073,<br>Mo-K $\alpha$                                           | 71.073,<br>Mo-K $\alpha$                                           | 71.073,<br>Mo-K $\alpha$                                           | 71.073,<br>Mo-K $\alpha$                                          |
| Crystal system                                                                              | Triclinic                                                          | Triclinic                                                          | Triclinic                                                          | Orthorhombic                                                      |
| Space group                                                                                 | $P\bar{1}$                                                         | $P\bar{1}$                                                         | $P\bar{1}$                                                         | $Pbca$                                                            |
| $a$ / pm                                                                                    | 832.3(1)                                                           | 831.4(1)                                                           | 830.1(2)                                                           | 1329.8(1)                                                         |
| $b$ / pm                                                                                    | 1045.6(1)                                                          | 1045.6(2)                                                          | 1050.6(3)                                                          | 1916.0(1)                                                         |
| $c$ / pm                                                                                    | 1226.0(1)                                                          | 1224.2(2)                                                          | 1229.9(3)                                                          | 2051.1(1)                                                         |
| $\alpha$ / °                                                                                | 74.63(1)                                                           | 74.60(1)                                                           | 75.20(1)                                                           | 90                                                                |
| $\beta$ / °                                                                                 | 86.96(1)                                                           | 86.88(1)                                                           | 86.95(1)                                                           | 90                                                                |
| $\gamma$ / °                                                                                | 68.71(1)                                                           | 68.64(1)                                                           | 68.34(1)                                                           | 90                                                                |
| $V$ / 10 <sup>6</sup> pm <sup>3</sup>                                                       | 957.5(1)                                                           | 954.5(2)                                                           | 962.9(4)                                                           | 5226.1(5)                                                         |
| $Z$                                                                                         | 2                                                                  | 2                                                                  | 2                                                                  | 8                                                                 |
| $\rho_{\text{calc}}$ / g·cm <sup>-3</sup>                                                   | 1.897                                                              | 1.909                                                              | 1.910                                                              | 1.734                                                             |
| $\mu$ / mm <sup>-1</sup>                                                                    | 3.497                                                              | 3.718                                                              | 3.872                                                              | 2.082                                                             |
| F(000)                                                                                      | 530                                                                | 532                                                                | 534                                                                | 2696                                                              |
| Crystal size / mm <sup>3</sup>                                                              | 0.027 x 0.026 x 0.015                                              | 0.050 x 0.036 x 0.019                                              | 0.061 x 0.047 x 0.014                                              | 0.021 x 0.032 x 0.074                                             |
| $\theta_{\text{min}}$ / °                                                                   | 2.387                                                              | 2.169                                                              | 1.714                                                              | 2.112                                                             |
| $\theta_{\text{max}}$ / °                                                                   | 27.253                                                             | 27.170                                                             | 27.308                                                             | 27.132                                                            |
| Reflections collected                                                                       | 95185                                                              | 33424                                                              | 21316                                                              | 94436                                                             |
| Independent reflections                                                                     | 4281                                                               | 4211                                                               | 4281                                                               | 5784                                                              |
| $R(\text{int})$                                                                             | 0.1488                                                             | 0.0560                                                             | 0.0624                                                             | 0.1012                                                            |
| No. Of parameters                                                                           | 235                                                                | 235                                                                | 236                                                                | 334                                                               |
| GOF                                                                                         | 1.040                                                              | 0.874                                                              | 1.167                                                              | 1.040                                                             |
| Final $R$ indices [ $I > 2\sigma(I)$ ]                                                      | $R_1 = 0.0262$ , $wR_2 = 0.0444$                                   | $R_1 = 0.0274$ , $wR_2 = 0.0956$                                   | $R_1 = 0.0398$ , $wR_2 = 0.0816$                                   | $R_1 = 0.0309$ , $wR_2 = 0.0645$                                  |
| $R$ indices (all data)                                                                      | $R_1 = 0.0393$ , $wR_2 = 0.0473$                                   | $R_1 = 0.0332$ , $wR_2 = 0.1021$                                   | $R_1 = 0.0499$ , $wR_2 = 0.0846$                                   | $R_1 = 0.0412$ , $wR_2 = 0.0709$                                  |
| $\Delta\rho_{\text{max}}$ , $\Delta\rho_{\text{min}}$ / e10 <sup>-6</sup> ·pm <sup>-3</sup> | 1.683, -0.804                                                      | 1.007, -1.368                                                      | 1.235, -0.900                                                      | 1.764, -0.595                                                     |

**Table S4.** Crystallographic data of [Ln(2-PyPzH)<sub>2</sub>Cl<sub>3</sub>], Ln = Tb (**12**), Dy (**13**), Ho (**14**), and Eu (**15**).

| Compound                                                                                       | [Tb(2-PyPzH) <sub>2</sub> Cl <sub>3</sub> ]                       | [Dy(2-PyPzH) <sub>2</sub> Cl <sub>3</sub> ]                       | [Ho(2-PyPzH) <sub>2</sub> Cl <sub>3</sub> ]                       | [Er(2-PyPzH) <sub>2</sub> Cl <sub>3</sub> ]                       |
|------------------------------------------------------------------------------------------------|-------------------------------------------------------------------|-------------------------------------------------------------------|-------------------------------------------------------------------|-------------------------------------------------------------------|
| CCDC number                                                                                    | 2208108                                                           | 2208109                                                           | 2208110                                                           | 2208111                                                           |
| Empirical formula                                                                              | C <sub>16</sub> H <sub>14</sub> N <sub>6</sub> Cl <sub>3</sub> Tb | C <sub>16</sub> H <sub>14</sub> N <sub>6</sub> Cl <sub>3</sub> Dy | C <sub>16</sub> H <sub>14</sub> N <sub>6</sub> Cl <sub>3</sub> Ho | C <sub>16</sub> H <sub>14</sub> N <sub>6</sub> Cl <sub>3</sub> Er |
| <i>M<sub>r</sub></i> / g·mol <sup>-1</sup>                                                     | 555.60                                                            | 559.18                                                            | 561.61                                                            | 563.94                                                            |
| <i>T</i> / K                                                                                   | 100(2)                                                            | 100(2)                                                            | 100(2)                                                            | 100(2)                                                            |
| <i>λ</i> / pm                                                                                  | 71.073,<br>Mo-K <sub>α</sub>                                      | 71.073,<br>Mo-K <sub>α</sub>                                      | 71.073,<br>Mo-K <sub>α</sub>                                      | 71.073,<br>Mo-K <sub>α</sub>                                      |
| Crystal system                                                                                 | Monoclinic                                                        | Monoclinic                                                        | Monoclinic                                                        | Monoclinic                                                        |
| Space group                                                                                    | <i>P</i> 2 <sub>1</sub> / <i>c</i>                                |
| <i>a</i> / pm                                                                                  | 1072.9(1)                                                         | 1070.9(2)                                                         | 1072.0(1)                                                         | 1073.0(1)                                                         |
| <i>b</i> / pm                                                                                  | 1221.8(1)                                                         | 1222.1(2)                                                         | 1220.1(1)                                                         | 1218.5(1)                                                         |
| <i>c</i> / pm                                                                                  | 1467.1(1)                                                         | 1466.1(2)                                                         | 1465.3(1)                                                         | 1464.6(1)                                                         |
| <i>α</i> / °                                                                                   | 90                                                                | 90                                                                | 90                                                                | 90                                                                |
| <i>β</i> / °                                                                                   | 92.66(1)                                                          | 92.32(1)                                                          | 91.989(3)                                                         | 91.761                                                            |
| <i>γ</i> / °                                                                                   | 90                                                                | 90                                                                | 90                                                                | 90                                                                |
| <i>V</i> / 10 <sup>6</sup> pm <sup>3</sup>                                                     | 1921.2(2)                                                         | 1917.1(5)                                                         | 1915.43(14)                                                       | 1913.9(1)                                                         |
| <i>Z</i>                                                                                       | 4                                                                 | 4                                                                 | 4                                                                 | 4                                                                 |
| <i>ρ</i> <sub>calc</sub> / g·cm <sup>-3</sup>                                                  | 1.921                                                             | 1.937                                                             | 1.948                                                             | 1.957                                                             |
| <i>μ</i> / mm <sup>-1</sup>                                                                    | 4.111                                                             | 4.328                                                             | 4.562                                                             | 4.816                                                             |
| F(000)                                                                                         | 1072                                                              | 1076                                                              | 1080                                                              | 1084                                                              |
| Crystal size /<br>mm <sup>3</sup>                                                              | 0.131 × 0.022 ×<br>0.014                                          | 0.112 × 0.059 × 0.033                                             | 0.224 × 0.201 × 0.137                                             | 0.196 × 0.081 × 0.034                                             |
| <i>θ</i> <sub>min</sub> / °                                                                    | 1.900                                                             | 1.903                                                             | 2.530                                                             | 2.175                                                             |
| <i>θ</i> <sub>max</sub> / °                                                                    | 26.413                                                            | 25.578                                                            | 34.969                                                            | 38.565                                                            |
| Reflections<br>collected                                                                       | 32112                                                             | 61699                                                             | 75143                                                             | 107396                                                            |
| Independent<br>reflections                                                                     | 3944                                                              | 3596                                                              | 8419                                                              | 10826                                                             |
| <i>R</i> (int)                                                                                 | 0.0894                                                            | 0.0759                                                            | 0.1273                                                            | 0.0845                                                            |
| No. Of<br>parameters                                                                           | 235                                                               | 235                                                               | 235                                                               | 235                                                               |
| GOF                                                                                            | 1.038                                                             | 1.068                                                             | 1.065                                                             | 1.026                                                             |
| Final <i>R</i> indices [ <i>I</i> ><br>2σ( <i>I</i> )]                                         | <i>R</i> 1 = 0.0360, <i>wR</i> 2 =<br>0.0639                      | <i>R</i> 1 = 0.0263, <i>wR</i> 2 =<br>0.0583                      | <i>R</i> 1 = 0.0600, <i>wR</i> 2 =<br>0.1190                      | <i>R</i> 1 = 0.0303, <i>wR</i> 2 =<br>0.0514                      |
| <i>R</i> indices (all<br>data)                                                                 | <i>R</i> 1 = 0.0556, <i>wR</i> 2 =<br>0.0705                      | <i>R</i> 1 = 0.0345, <i>wR</i> 2 =<br>0.0618                      | <i>R</i> 1 = 0.1137, <i>wR</i> 2 =<br>0.1377                      | <i>R</i> 1 = 0.0531, <i>wR</i> 2 =<br>0.0565                      |
| Δ <i>ρ</i> <sub>max</sub> , Δ <i>ρ</i> <sub>min</sub> /<br>e·10 <sup>-6</sup> pm <sup>-3</sup> | 1.628, -0.890                                                     | 1.631, -1.113                                                     | 5.536, -2.807                                                     | 2.231, -1.785                                                     |

**Table S5.** Crystallographic data of [Gd<sub>2</sub>(2-PyPzH)<sub>3</sub>(2-PyPz)Cl<sub>5</sub>] (**16**), [Gd<sub>3</sub>(2-PyPzH)<sub>8</sub>Cl<sub>8</sub>]Cl (**17**), and [PyH][Tb(2-PyPzH)<sub>2</sub>Cl<sub>4</sub>] (**18**).

| Compound                                                                                    | [Gd <sub>2</sub> (2-PyPzH) <sub>3</sub> (2-PyPz)Cl <sub>5</sub> ]               | [Gd <sub>3</sub> (2-PyPzH) <sub>8</sub> Cl <sub>8</sub> ]Cl                     | [PyH][Tb(2-PyPzH) <sub>2</sub> Cl <sub>4</sub> ]                  |
|---------------------------------------------------------------------------------------------|---------------------------------------------------------------------------------|---------------------------------------------------------------------------------|-------------------------------------------------------------------|
| CCDC number                                                                                 | 2208112                                                                         | 2208113                                                                         | 2208114                                                           |
| Empirical formula                                                                           | C <sub>32</sub> H <sub>27</sub> N <sub>12</sub> Cl <sub>5</sub> Gd <sub>2</sub> | C <sub>64</sub> H <sub>56</sub> N <sub>24</sub> Cl <sub>9</sub> Gd <sub>3</sub> | C <sub>21</sub> H <sub>20</sub> N <sub>7</sub> Cl <sub>4</sub> Tb |
| <i>M<sub>r</sub></i> / g·mol <sup>-1</sup>                                                  | 1071.40                                                                         | 1952.12                                                                         | 671.16                                                            |
| <i>T</i> / K                                                                                | 100(2)                                                                          | 100(2)                                                                          | 200(2)                                                            |
| <i>λ</i> / pm                                                                               | 71.073                                                                          | 71.073,                                                                         | 71.073,                                                           |
|                                                                                             | Mo-K <sub>α</sub>                                                               | Mo-K <sub>α</sub>                                                               | Mo-K <sub>α</sub>                                                 |
| Crystal system                                                                              | Monoclinic                                                                      | Triclinic                                                                       | Orthorhombic                                                      |
| Space group                                                                                 | <i>P</i> 2 <sub>1</sub> / <i>n</i>                                              | <i>P</i> 1̄                                                                     | <i>Pbcn</i>                                                       |
| <i>a</i> / pm                                                                               | 1047.5(1)                                                                       | 994.2(2)                                                                        | 1205.5(1)                                                         |
| <i>b</i> / pm                                                                               | 1982.9(1)                                                                       | 1963.5(3)                                                                       | 1230.6(1)                                                         |
| <i>c</i> / pm                                                                               | 1914.4(1)                                                                       | 2016.1(3)                                                                       | 1762.2(2)                                                         |
| <i>α</i> / °                                                                                | 90                                                                              | 69.87(1)                                                                        | 90                                                                |
| <i>β</i> / °                                                                                | 102.37(1)                                                                       | 88.81(1)                                                                        | 90                                                                |
| <i>γ</i> / °                                                                                | 90                                                                              | 78.39(1)                                                                        | 90                                                                |
| <i>V</i> / 10 <sup>6</sup> pm <sup>3</sup>                                                  | 3883.8(4)                                                                       | 3614.6(8)                                                                       | 2614.1(2)                                                         |
| <i>Z</i>                                                                                    | 4                                                                               | 2                                                                               | 4                                                                 |
| <i>ρ</i> <sub>calc</sub> / g·cm <sup>-3</sup>                                               | 1.832                                                                           | 1.794                                                                           | 1.705                                                             |
| <i>μ</i> / mm <sup>-1</sup>                                                                 | 3.771                                                                           | 3.112                                                                           | 3.137                                                             |
| <i>F</i> (000)                                                                              | 2064                                                                            | 1906                                                                            | 1312                                                              |
| Crystal size / mm <sup>3</sup>                                                              | 0.31 × 0.102 × 0.027                                                            | 0.076 × 0.038 × 0.036                                                           | 0.285 × 0.150 × 0.122                                             |
| <i>θ</i> <sub>min</sub> / °                                                                 | 2.054                                                                           | 2.056                                                                           | 2.633                                                             |
| <i>θ</i> <sub>max</sub> / °                                                                 | 27.193                                                                          | 27.103                                                                          | 27.133                                                            |
| Reflections collected                                                                       | 76683                                                                           | 163558                                                                          | 32818                                                             |
| Independent reflections                                                                     | 8618                                                                            | 15930                                                                           | 2895                                                              |
| <i>R</i> (int)                                                                              | 0.1076                                                                          | 0.0890                                                                          | 0.0496                                                            |
| No. Of parameters                                                                           | 460                                                                             | 1001                                                                            | 177                                                               |
| GOF                                                                                         | 1.074                                                                           | 1.100                                                                           | 1.069                                                             |
| Final <i>R</i> indices [ <i>I</i> > 2σ( <i>I</i> )]                                         | <i>R</i> <sub>1</sub> = 0.0454, <i>wR</i> <sub>2</sub> = 0.0968                 | <i>R</i> <sub>1</sub> = 0.0463, <i>wR</i> <sub>2</sub> = 0.0869                 | <i>R</i> <sub>1</sub> = 0.0197, <i>wR</i> <sub>2</sub> = 0.0365   |
| <i>R</i> indices (all data)                                                                 | <i>R</i> <sub>1</sub> = 0.0800, <i>wR</i> <sub>2</sub> = 0.1109                 | <i>R</i> <sub>1</sub> = 0.0678, <i>wR</i> <sub>2</sub> = 0.0935                 | <i>R</i> <sub>1</sub> = 0.0320, <i>wR</i> <sub>2</sub> = 0.0406   |
| Δ <i>ρ</i> <sub>max</sub> , Δ <i>ρ</i> <sub>min</sub> / e·10 <sup>-6</sup> pm <sup>-3</sup> | 2.264, -1.227                                                                   | 1.537, -1.340                                                                   | 0.369, -0.488                                                     |

## Interatomic distances and Angles

**Table S6.** Selected interatomic distances (pm) and angles (°) of  $\text{[Ln}_2\text{(2-PyPzH)}_4\text{Cl}_6\text{]}$ , Ln= La (**1**), Nd (**2**), and Sm (**3**). Symmetry operations: I -x+1,y,-z+1/2.

| Compound                  | $\text{[La}_2\text{(2-PyPzH)}_4\text{Cl}_6\text{]}$ | $\text{[Nd}_2\text{(2-PyPzH)}_4\text{Cl}_6\text{]}$ | $\text{[Sm}_2\text{(2-PyPzH)}_4\text{Cl}_6\text{]}$ |
|---------------------------|-----------------------------------------------------|-----------------------------------------------------|-----------------------------------------------------|
| Ln1-Cl1                   | 290.4(1)                                            | 287.7(1)                                            | 283.9(1)                                            |
| Ln1-Cl2                   | 281.6(1)                                            | 275.0(1)                                            | 272.0(2)                                            |
| Ln1-Cl3                   | 277.5(1)                                            | 272.4(1)                                            | 269.6(2)                                            |
| Ln1-Cl4                   | 292.4(1)                                            | 289.2(1)                                            | 285.6(2)                                            |
| Ln2-Cl4                   | 294.5(1)                                            | 292(1)                                              | 288.8(2)                                            |
| Ln2-Cl5                   | 280.3(1)                                            | 273.8(1)                                            | 270.6(2)                                            |
| Ln1-N1                    | 273.9(3)                                            | 268.6(3)                                            | 265.5(5)                                            |
| Ln1-N2                    | 262.2(3)                                            | 256.1(3)                                            | 253.2(5)                                            |
| Ln1-N4                    | 275.5(3)                                            | 270.3(4)                                            | 267.0(5)                                            |
| Ln1-N5                    | 263.3(3)                                            | 257.0(3)                                            | 254.2(5)                                            |
| Ln2-N7                    | 269(2)                                              | 267(1)                                              | 265(1)                                              |
| Ln2-N8                    | 266(2)                                              | 260(1)                                              | 255(1)                                              |
| Cl1-Ln1-Cl2               | 78.6(1)                                             | 78.1(1)                                             | 78.0(1)                                             |
| Cl1-Ln1-Cl3               | 78.1(1)                                             | 78.0(1)                                             | 78.0(1)                                             |
| Cl3-Ln1-Cl2               | 92.2(1)                                             | 92.7(1)                                             | 94.2(1)                                             |
| Cl1-Ln1-Cl4               | 151.4(1)                                            | 150.1(1)                                            | 149.0(1)                                            |
| Cl2-Ln1-Cl4               | 75.7(1)                                             | 75.6(1)                                             | 75.9(1)                                             |
| Cl3-Ln1-Cl4               | 90.8(1)                                             | 89.1(1)                                             | 87.7(1)                                             |
| Cl4-Ln2-Cl4 <sup>I</sup>  | 132.9(1)                                            | 132.7(1)                                            | 133.3(1)                                            |
| Cl5-Ln2-Cl4               | 79.9(1)                                             | 79.6(1)                                             | 79.0(1)                                             |
| Cl5 <sup>I</sup> -Ln2-Cl4 | 76.6(1)                                             | 76.5(1)                                             | 76.5(1)                                             |
| Cl5-Ln2-Cl5 <sup>I</sup>  | 118.8(1)                                            | 117.8(1)                                            | 115.2(1)                                            |
| N1-Ln1-Cl1                | 75.8(1)                                             | 76.1(1)                                             | 76.0(1)                                             |
| N1-Ln1-Cl2                | 150.5(1)                                            | 149.5(1)                                            | 147.5(2)                                            |
| N1-Ln1-Cl3                | 96.4(1)                                             | 97.6(1)                                             | 98.9(1)                                             |
| N1-Ln1-Cl4                | 132.1(1)                                            | 133.0(1)                                            | 133.9(2)                                            |
| N2-Ln1-Cl1                | 125.1(1)                                            | 125.6(1)                                            | 125.5(1)                                            |
| N2-Ln1-Cl2                | 148.2(1)                                            | 148.5(1)                                            | 149.7(1)                                            |
| N2-Ln1-Cl3                | 75.1(1)                                             | 75.1(1)                                             | 75.2(1)                                             |
| N2-Ln1-Cl4                | 75.6(1)                                             | 75.3(1)                                             | 75.4(1)                                             |
| N4-Ln1-Cl1                | 128.1(1)                                            | 129.5(1)                                            | 131.2(1)                                            |
| N4-Ln1-Cl2                | 112.6(1)                                            | 111.3(1)                                            | 109.6(1)                                            |
| N4-Ln1-Cl3                | 145.9(1)                                            | 145.6(1)                                            | 144.8(1)                                            |
| N4-Ln1-Cl4                | 74.2(1)                                             | 74.3(1)                                             | 74.1(2)                                             |
| N5-Ln1-Cl1                | 70.6(1)                                             | 71.3(1)                                             | 72.0(2)                                             |
| N5-Ln1-Cl2                | 84.7(1)                                             | 82.4(1)                                             | 80.8(1)                                             |
| N5-Ln1-Cl3                | 148.5(1)                                            | 149.2(1)                                            | 150.0(1)                                            |
| N5-Ln1-Cl4                | 118.5(1)                                            | 118.5(1)                                            | 119.1(1)                                            |
| N7-Ln2-Cl4                | 81.8(2)                                             | 81.1(2)                                             | 80.8(2)                                             |

|                                       |          |          |          |
|---------------------------------------|----------|----------|----------|
| N7 <sup>-</sup> -Ln2-Cl4              | 136.0(2) | 82.8(3)  | 137.5(2) |
| N7 <sup>-</sup> -Ln2-Cl5              | 145.0(3) | 144.4(3) | 143.8(3) |
| N7 <sup>-</sup> -Ln2-Cl5 <sup>†</sup> | 85.2(4)  | 85.9(4)  | 88.4(3)  |
| N8 <sup>-</sup> -Ln2-Cl4              | 135.8(3) | 135.0(2) | 134.5(3) |
| N8 <sup>-</sup> -Ln2-Cl4              | 75.1(2)  | 75(2)    | 74.7(2)  |
| N8 <sup>-</sup> -Ln2-Cl5              | 76.8(4)  | 75.9(3)  | 76.0(3)  |
| N8 <sup>-</sup> -Ln2-Cl5 <sup>†</sup> | 144.3(3) | 145.1(2) | 146.2(3) |
| N2-Ln1-N1                             | 61.1(1)  | 61.9(1)  | 62.7(2)  |
| N2-Ln1-N4                             | 71.6(1)  | 71.6(1)  | 71.3(2)  |
| N4-Ln1-N1                             | 73.8(1)  | 74.4(1)  | 74.9(2)  |
| N5-Ln1-N1                             | 73.4(1)  | 74.1(1)  | 73.1(2)  |
| N5-Ln1-N2                             | 121.2(1) | 122.5(1) | 122.2(2) |
| N5-Ln1-N4                             | 60.9(1)  | 61.8(1)  | 62.4(2)  |
| N7 <sup>-</sup> -Ln2-N7               | 87.6(8)  | 88.2(7)  | 86.6(6)  |
| N8 <sup>-</sup> -Ln2-N7               | 61.2(2)  | 62.2(2)  | 62.9(2)  |
| N8 <sup>-</sup> -Ln2-N7               | 69.7(5)  | 70.3(5)  | 69.8(5)  |
| N8 <sup>-</sup> -Ln2-N8               | 110.0(6) | 112.1(5) | 113.3(5) |

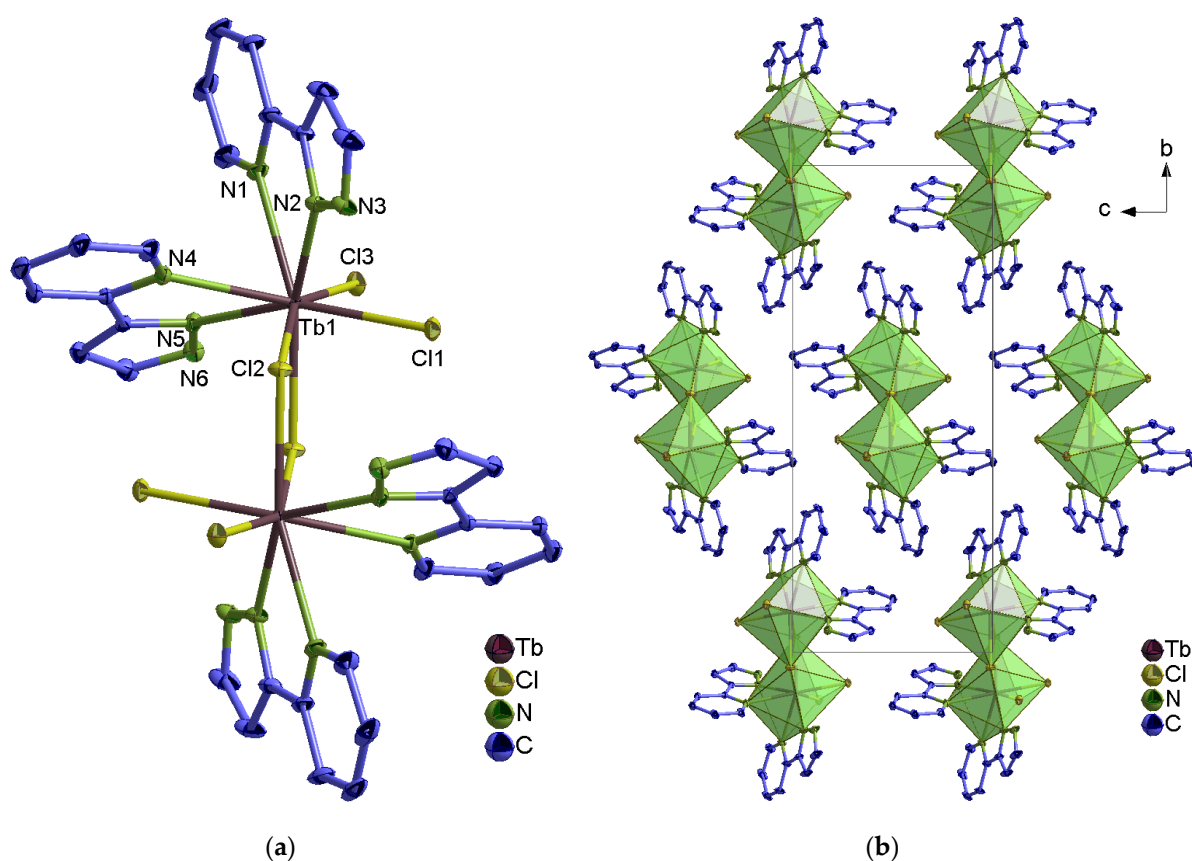

**Figure S1.** (a) Extended coordination sphere of Tb<sup>3+</sup> ion in  $\alpha$ -[Tb<sub>2</sub>(2-PyPzH)<sub>4</sub>Cl<sub>6</sub>] (7) representing the isotopic complexes 4–7. (b) Packing structure of 7 with a view along [100]. In all figures, the hydrogen atoms are omitted for clarity and the coordination polyhedra around Ln<sup>3+</sup> are shown in green, with thermal ellipsoids shown with a probability of 50%.

**Table S7.** Selected interatomic distances (pm) and angles (°) of  $\alpha$ -[Ln<sub>2</sub>(2-PyPzH)<sub>4</sub>Cl<sub>6</sub>], Ln=Eu (**6**), Gd (**7**), and Tb (**8**).

| Compound    | $\alpha$ -[Eu <sub>2</sub> (2-PyPzH) <sub>4</sub> Cl <sub>6</sub> ] | $\alpha$ -[Gd <sub>2</sub> (2-PyPzH) <sub>4</sub> Cl <sub>6</sub> ] | $\alpha$ -[Tb <sub>2</sub> (2-PyPzH) <sub>4</sub> Cl <sub>6</sub> ] |
|-------------|---------------------------------------------------------------------|---------------------------------------------------------------------|---------------------------------------------------------------------|
| Ln1-Cl1     | 277.6(2)                                                            | 266.5(2)                                                            | 266.0(1)                                                            |
| Ln1-Cl2     | 270.8(2)                                                            | 276.7(2)                                                            | 275.8(1)                                                            |
| Ln1-Cl3     | 266.9(2)                                                            | 269.9(2)                                                            | 269.2(1)                                                            |
| Ln1-N1      | 265.1(4)                                                            | 266.0(2)                                                            | 262.5(2)                                                            |
| Ln1-N2      | 248.7(5)                                                            | 249.0(2)                                                            | 247.3(2)                                                            |
| Ln1-N4      | 262.0(2)                                                            | 264.6(5)                                                            | 262.7(2)                                                            |
| Ln1-N5      | 250.0(2)                                                            | 247.4(6)                                                            | 246.0(2)                                                            |
| Cl1-Ln1-Cl2 | 87.0(1)                                                             | 83.7(1)                                                             | 83.1(1)                                                             |
| Cl1-Ln1-Cl3 | 84.1(1)                                                             | 80.7(1)                                                             | 80.8(1)                                                             |
| Cl3-Ln1-Cl2 | 81.1(1)                                                             | 87.0(1)                                                             | 87.5(1)                                                             |
| N1-Ln1-Cl1  | 104.2(1)                                                            | 116.2(4)                                                            | 118.7(1)                                                            |
| N1-Ln1-Cl2  | 131.5(1)                                                            | 151.0(3)                                                            | 148.0(1)                                                            |
| N1-Ln1-Cl3  | 146.1(1)                                                            | 76.5(4)                                                             | 74.6(1)                                                             |
| N2-Ln1-Cl1  | 73.9(1)                                                             | 76.8(5)                                                             | 79.6(1)                                                             |
| N2-Ln1-Cl2  | 76.3(1)                                                             | 146.7(3)                                                            | 148.5(1)                                                            |
| N2-Ln1-Cl3  | 148.9(2)                                                            | 115.7(5)                                                            | 115.1(1)                                                            |
| N4-Ln1-Cl1  | 144.0(3)                                                            | 146.1(2)                                                            | 146.0(1)                                                            |
| N4-Ln1-Cl2  | 71.4(6)                                                             | 104.5(2)                                                            | 104.2(1)                                                            |
| N4-Ln1-Cl3  | 119.1(7)                                                            | 131.8(2)                                                            | 132.0(1)                                                            |
| N5-Ln1-Cl1  | 152.6(4)                                                            | 148.8(2)                                                            | 148.0(1)                                                            |
| N5-Ln1-Cl2  | 114.9(6)                                                            | 74.0(2)                                                             | 73.9(1)                                                             |
| N5-Ln1-Cl3  | 83.4(6)                                                             | 76.7(2)                                                             | 76.5(1)                                                             |
| N2-Ln1-N1   | 62.7(2)                                                             | 62.1(4)                                                             | 63.1(1)                                                             |
| N2-Ln1-N4   | 73.2(5)                                                             | 79.2(6)                                                             | 77.6(1)                                                             |
| N4-Ln1-N1   | 72.7(7)                                                             | 71.4(5)                                                             | 71.6(1)                                                             |
| N5-Ln1-N1   | 74.4(7)                                                             | 79.1(4)                                                             | 76.3(1)                                                             |
| N5-Ln1-N2   | 125.5(5)                                                            | 132.7(4)                                                            | 130.6(1)                                                            |
| N5-Ln1-N4   | 62.7(4)                                                             | 62.8(2)                                                             | 63.3(1)                                                             |

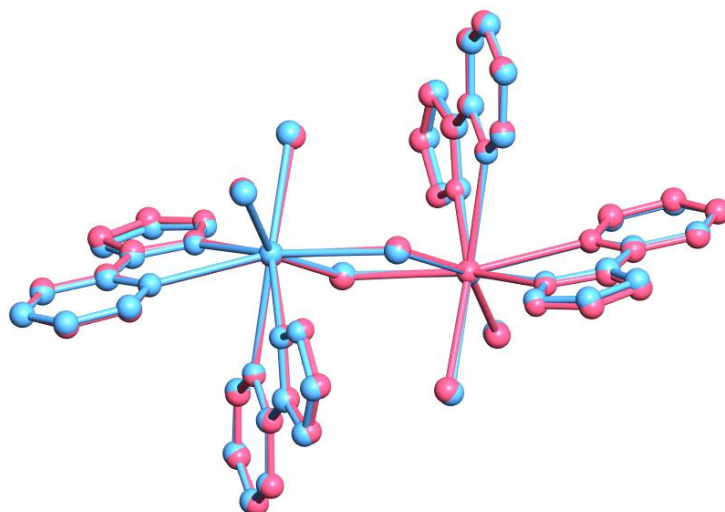

**Figure S2.** Overlay of the molecular structures of  $\alpha$ -[Eu<sub>2</sub>(2-PyPzH)<sub>4</sub>Cl<sub>6</sub>] (red) (5) and  $\beta$ -[Eu<sub>2</sub>(2-PyPzH)<sub>4</sub>Cl<sub>6</sub>] (blue) (9).

**Table S8.** Selected interatomic distances (pm) and angles (°) of  $\beta$ -[Ln<sub>2</sub>(2-PyPzH)<sub>4</sub>Cl<sub>6</sub>], Ln= Sm (8), Eu (9), and Gd (10).

| Compound    | $\beta$ -[Sm <sub>2</sub> (2-PyPzH) <sub>4</sub> Cl <sub>6</sub> ] | $\beta$ -[Eu <sub>2</sub> (2-PyPzH) <sub>4</sub> Cl <sub>6</sub> ] | $\beta$ -[Gd <sub>2</sub> (2-PyPzH) <sub>4</sub> Cl <sub>6</sub> ] |
|-------------|--------------------------------------------------------------------|--------------------------------------------------------------------|--------------------------------------------------------------------|
| Ln1-Cl1     | 272.8(1)                                                           | 272(1)                                                             | 271.1(2)                                                           |
| Ln1-Cl2     | 269.2(1)                                                           | 268.5(1)                                                           | 267.7(2)                                                           |
| Ln1-Cl3     | 277.6(1)                                                           | 276.2(1)                                                           | 276.0(2)                                                           |
| Ln1-N1      | 265.1(3)                                                           | 264.6(4)                                                           | 264.1(5)                                                           |
| Ln1-N2      | 251.1(3)                                                           | 251.2(3)                                                           | 249.0(5)                                                           |
| Ln1-N4      | 267.0(3)                                                           | 266.0(4)                                                           | 265.5(5)                                                           |
| Ln1-N5      | 250.0(3)                                                           | 249.1(3)                                                           | 247.6(5)                                                           |
| Cl1-Ln1-Cl2 | 82.1(1)                                                            | 81.9(1)                                                            | 81.4(1)                                                            |
| Cl1-Ln1-Cl3 | 86.7(1)                                                            | 87.0(1)                                                            | 86.6(1)                                                            |
| Cl3-Ln1-Cl2 | 86.1(1)                                                            | 86.2(1)                                                            | 86.5(1)                                                            |
| N1-Ln1-Cl1  | 130.5(1)                                                           | 130.8(1)                                                           | 130.9(1)                                                           |
| N1-Ln1-Cl2  | 145.9(1)                                                           | 145.8(1)                                                           | 145.9(1)                                                           |
| N1-Ln1-Cl3  | 103.2(1)                                                           | 103.2(1)                                                           | 103.9(1)                                                           |
| N2-Ln1-Cl1  | 74.5(1)                                                            | 74.7(1)                                                            | 75.1(1)                                                            |
| N2-Ln1-Cl2  | 150.4(1)                                                           | 150.3(1)                                                           | 150.5(1)                                                           |
| N2-Ln1-Cl3  | 74.7(1)                                                            | 74.6(1)                                                            | 74.9(1)                                                            |
| N4-Ln1-Cl1  | 77.0(1)                                                            | 76.7(1)                                                            | 76.8(1)                                                            |
| N4-Ln1-Cl2  | 114.9(1)                                                           | 114.9(1)                                                           | 114.1(2)                                                           |
| N4-Ln1-Cl3  | 150.7(1)                                                           | 150.6(1)                                                           | 150.7(2)                                                           |
| N5-Ln1-Cl1  | 119.1(1)                                                           | 118.7(1)                                                           | 119.1(2)                                                           |
| N5-Ln1-Cl2  | 77.3(1)                                                            | 77.0(1)                                                            | 77.0(2)                                                            |
| N5-Ln1-Cl3  | 146.4(1)                                                           | 146.2(1)                                                           | 146.2(1)                                                           |
| N2-Ln1-N1   | 62.3(1)                                                            | 62.6(1)                                                            | 62.5(2)                                                            |

|           |          |          |          |
|-----------|----------|----------|----------|
| N2–Ln1–N4 | 77.6(1)  | 77.6(1)  | 77.6(2)  |
| N4–Ln1–N1 | 71.3(1)  | 71.5(1)  | 71.3(2)  |
| N5–Ln1–N1 | 77.3(1)  | 77.5(1)  | 76.8(2)  |
| N5–Ln1–N2 | 130.2(1) | 130.6(1) | 130.2(2) |
| N5–Ln1–N4 | 62.0(1)  | 62.4(1)  | 62.4(2)  |

**Table S9.** Selected interatomic distances (pm) and angles (°) of [Ce(2–PyPzH)<sub>3</sub>Cl<sub>3</sub>] (**11**).

| Atoms       | [Ce(2–PyPzH) <sub>3</sub> Cl <sub>3</sub> ] | Atoms      | [Ce(2–PyPzH) <sub>3</sub> Cl <sub>3</sub> ] |
|-------------|---------------------------------------------|------------|---------------------------------------------|
| Ce1–Cl1     | 279.9(2)                                    | N1–Ce1–Cl2 | 77.03(9)                                    |
| Ce1–Cl2     | 279.7(2)                                    | N2–Ce1–Cl1 | 70.0(1)                                     |
| Ce1–Cl3     | 283.2(1)                                    | N2–Ce1–Cl2 | 128.9(1)                                    |
| Ce1–N1      | 271.5(4)                                    | N5–Ce1–Cl1 | 137.2(1)                                    |
| Ce1–N2      | 264.6(4)                                    | N5–Ce1–Cl2 | 134.4(1)                                    |
| Ce1–N4      | 282.6(4)                                    | N8–Ce1–Cl1 | 74.3(1)                                     |
| Ce1–N5      | 260.7(4)                                    | N8–Ce1–Cl2 | 71.1(1)                                     |
| Ce1–N7      | 280.4(4)                                    | N1–Ce1–N4  | 68.7(1)                                     |
| Ce1–N8      | 261.1(4)                                    | N1–Ce1–N7  | 137.3(1)                                    |
| Cl1–Ce1–Cl3 | 86.5(1)                                     | N2–Ce1–N1  | 60.8(2)                                     |
| Cl2–Ce1–Cl3 | 146.7(1)                                    | N2–Ce1–N4  | 110.7(2)                                    |
| N1–Ce1–Cl3  | 132.2(1)                                    | N2–Ce1–N7  | 138.3(2)                                    |
| N2–Ce1–Cl3  | 72.1(1)                                     | N5–Ce1–N1  | 80.5(2)                                     |
| N4–Ce1–Cl3  | 125.5(1)                                    | N5–Ce1–N2  | 67.8(2)                                     |
| N5–Ce1–Cl3  | 74.1(1)                                     | N5–Ce1–N4  | 59.5(1)                                     |
| N7–Ce1–Cl3  | 75.8(1)                                     | N5–Ce1–N7  | 78.4(2)                                     |
| N8–Ce1–Cl3  | 76.1(1)                                     | N5–Ce1–N8  | 133.5(2)                                    |
| Cl1–Ce1–N4  | 147.4(1)                                    | N7–Ce1–N4  | 68.6(1)                                     |
| Cl1–Ce1–N7  | 133.7(1)                                    | N8–Ce1–N1  | 144.6(2)                                    |
| Cl2–Ce1–N4  | 75.4(1)                                     | N8–Ce1–N2  | 133.0(2)                                    |
| Cl2–Ce1–N7  | 92.1(1)                                     | N8–Ce1–N4  | 115.9(2)                                    |
| N1–Ce1–Cl1  | 85.5(1)                                     | N8–Ce1–N7  | 60.1(2)                                     |

**Table S10.** Selected interatomic distances (pm) and angles (°) of [Ln(2–PyPzH)<sub>2</sub>Cl<sub>3</sub>], Ln= Tb (**12**), Dy (**13**), Ho (**14**), and Er (**15**).

| Compound | [Tb(2–PyPzH) <sub>2</sub> Cl <sub>3</sub> ] | [Dy(2–PyPzH) <sub>2</sub> Cl <sub>3</sub> ] | [Ho(2–PyPzH) <sub>2</sub> Cl <sub>3</sub> ] | [Er(2–PyPzH) <sub>2</sub> Cl <sub>3</sub> ] |
|----------|---------------------------------------------|---------------------------------------------|---------------------------------------------|---------------------------------------------|
| Ln1–Cl1  | 263.1(2)                                    | 261.7(1)                                    | 261.1(2)                                    | 260.2(1)                                    |
| Ln1–Cl2  | 262.2(2)                                    | 261.4(1)                                    | 260(2)                                      | 259.1(1)                                    |
| Ln1–Cl3  | 267.3(2)                                    | 265.7(1)                                    | 265.4(2)                                    | 264.5(1)                                    |
| Ln1–N1   | 256.7(4)                                    | 255.6(3)                                    | 253.7(5)                                    | 253.2(2)                                    |
| Ln1–N2   | 244.2(4)                                    | 242.9(3)                                    | 242.2(5)                                    | 240.5(2)                                    |
| Ln1–N4   | 255.9(4)                                    | 255.1(3)                                    | 253.6(5)                                    | 252.7(2)                                    |
| Ln1–N5   | 245.4(4)                                    | 244.6(3)                                    | 243.7(5)                                    | 241.9(2)                                    |

|             |          |          |          |          |
|-------------|----------|----------|----------|----------|
| Cl1–Ln1–Cl2 | 94.4(1)  | 95.1(1)  | 95.4(1)  | 95.5(1)  |
| Cl1–Ln1–Cl3 | 161.9(1) | 162.1(1) | 162.1(1) | 162.1(1) |
| Cl3–Ln1–Cl2 | 92.0(1)  | 91.1(1)  | 91.0(1)  | 90.5(1)  |
| N1–Ln1–Cl1  | 85.5(1)  | 85.6(1)  | 85.4(1)  | 85.4(1)  |
| N1–Ln1–Cl2  | 85.6(1)  | 85.7(1)  | 85.4(1)  | 85.5(1)  |
| N1–Ln1–Cl3  | 78.1(1)  | 78.2(1)  | 78.5(1)  | 78.3(1)  |
| N2–Ln1–Cl1  | 84.1(1)  | 83.8(1)  | 83.5(1)  | 83.5(1)  |
| N2–Ln1–Cl2  | 150.7(1) | 151.3(1) | 151.3(2) | 151.7(1) |
| N2–Ln1–Cl3  | 82.0(1)  | 82.8(1)  | 82.9(1)  | 83.3(1)  |
| N4–Ln1–Cl1  | 75.4(1)  | 75.3(1)  | 75.4(1)  | 75.5(1)  |
| N4–Ln1–Cl2  | 81.9(1)  | 81.6(1)  | 81.4(1)  | 81.1(1)  |
| N4–Ln1–Cl3  | 122.3(1) | 122.3(1) | 122.1(1) | 122.2(1) |
| N5–Ln–Cl1   | 112.3(1) | 112.0(1) | 111.7(1) | 112.2(1) |
| N5–Ln1–Cl2  | 127.8(1) | 127.3(1) | 127.4(1) | 127.1(1) |
| N5–Ln1–Cl3  | 76.3(1)  | 76.6(1)  | 76.8(1)  | 76.6(1)  |
| N2–Ln1–N1   | 65.1(2)  | 65.6(1)  | 65.9(2)  | 66.3(1)  |
| N2–Ln1–N4   | 125.4(2) | 125.3(1) | 125.5(2) | 125.3(1) |
| N4–Ln–N1    | 156.2(2) | 155.9(1) | 155.5(2) | 155.3(1) |
| N5–Ln1–N1   | 138.1(2) | 138.2(1) | 138.6(2) | 138.4(1) |
| N5–Ln1–N2   | 78.8(2)  | 78.6(1)  | 78.5(2)  | 78.3(1)  |
| N5–Ln1–N4   | 64.2(2)  | 64.4(1)  | 64.5(2)  | 64.9(1)  |

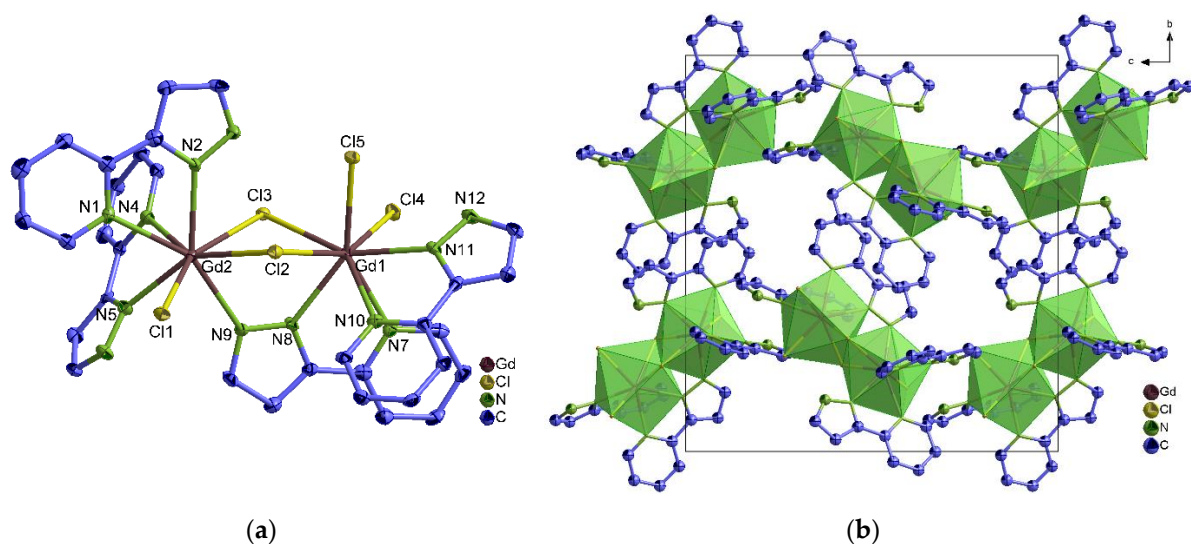

**Figure S3.** (a) Extended coordination sphere of Gd<sup>3+</sup> ion in [Gd<sub>2</sub>(2-PyPzH)<sub>3</sub>(2-PyPz)Cl<sub>5</sub>] (**16**). (b) Packing structure of **16** with a view along [100].

**Table S11.** Selected interatomic distances (pm) and angles (°) of [Gd<sub>2</sub>(2-PyPzH)<sub>3</sub>(2-PyPz)Cl<sub>5</sub>] (**16**).

| Atoms       | [Gd <sub>2</sub> (2-PyPzH) <sub>3</sub> (2-PyPz)Cl <sub>5</sub> ] | Atoms       | [Gd <sub>2</sub> (2-PyPzH) <sub>3</sub> (2-PyPz)Cl <sub>5</sub> ] |
|-------------|-------------------------------------------------------------------|-------------|-------------------------------------------------------------------|
| Gd1-Cl1     | 268.3(2)                                                          | N5-Gd1-Cl3  | 77.1(1)                                                           |
| Gd1-Cl2     | 276.0(2)                                                          | N7-Gd2-Cl2  | 149.5(1)                                                          |
| Gd1-Cl3     | 281.0(2)                                                          | N7-Gd2-Cl3  | 76.5(1)                                                           |
| Gd2-Cl2     | 281.6(2)                                                          | N7-Gd2-Cl4  | 73.5(1)                                                           |
| Gd2-Cl3     | 276.1(2)                                                          | N7-Gd2-Cl5  | 114.9(1)                                                          |
| Gd2-Cl4     | 270.8(2)                                                          | N8-Gd2-Cl2  | 145.5(1)                                                          |
| Gd2-Cl5     | 278.3(2)                                                          | N8-Gd2-Cl3  | 85.4(2)                                                           |
| Gd1-N1      | 261.9(5)                                                          | N8-Gd2-Cl4  | 76.2(2)                                                           |
| Gd1-N2      | 250.3(5)                                                          | N8-Gd2-Cl5  | 76.9(2)                                                           |
| Gd1-N4      | 263.5(5)                                                          | N9-Gd2-Cl1  | 85.4(2)                                                           |
| Gd1-N5      | 249.0(5)                                                          | N9-Gd2-Cl2  | 76.2(2)                                                           |
| Gd2-N7      | 257.4(5)                                                          | N9-Gd2-Cl3  | 76.9(2)                                                           |
| Gd2-N8      | 243.3(5)                                                          | N10-Gd2-Cl2 | 73.4(1)                                                           |
| Gd2-N9      | 248.5(5)                                                          | N10-Gd2-Cl3 | 143.4(1)                                                          |
| Gd2-N10     | 263.3(5)                                                          | N10-Gd2-Cl4 | 132.3(1)                                                          |
| Gd2-N11     | 247.3(5)                                                          | N10-Gd2-Cl5 | 110.8(1)                                                          |
| Cl1-Gd1-Cl2 | 79.1(1)                                                           | N11-Gd2-Cl2 | 112.9(2)                                                          |
| Cl1-Gd1-Cl3 | 153.7(1)                                                          | N11-Gd2-Cl3 | 152.3(1)                                                          |
| Cl2-Gd1-Cl3 | 78.0(1)                                                           | N11-Gd2-Cl4 | 78.9(2)                                                           |
| Cl3-Gd2-Cl2 | 77.8(1)                                                           | N11-Gd2-Cl5 | 76.6(1)                                                           |
| Cl3-Gd2-Cl5 | 82.3(1)                                                           | N1-Gd1-N4   | 74.7(2)                                                           |
| Cl4-Gd2-Cl3 | 81.4(1)                                                           | N2-Gd1-N1   | 63.0(2)                                                           |
| Cl4-Gd2-Cl2 | 152.2(1)                                                          | N2-Gd1-N4   | 81.0(2)                                                           |
| Cl4-Gd2-Cl5 | 84.5(1)                                                           | N5-Gd1-N1   | 77.3(2)                                                           |
| Cl5-Gd2-Cl2 | 74.7(1)                                                           | N5-Gd1-N2   | 132.4(2)                                                          |
| N1-Gd1-Cl1  | 74.6(1)                                                           | N5-Gd1-N4   | 63.2(2)                                                           |
| N1-Gd1-Cl2  | 118.1(1)                                                          | N7-Gd2-N10  | 67.4(2)                                                           |
| N1-Gd1-Cl3  | 128.2(1)                                                          | N8-Gd2-N7   | 65.0(2)                                                           |
| N2-Gd1-Cl1  | 77.5(1)                                                           | N8-Gd2-N10  | 78.0(2)                                                           |
| N2-Gd1-Cl2  | 135.4(1)                                                          | N8-Gd2-N11  | 132.9(2)                                                          |
| N2-Gd1-Cl3  | 144.8(1)                                                          | N9-Gd2-N1   | 151.7(2)                                                          |
| N4-Gd1-Cl1  | 79.0(1)                                                           | N9-Gd2-N2   | 144.8(2)                                                          |
| N4-Gd1-Cl2  | 148.2(1)                                                          | N9-Gd2-N4   | 108.6(2)                                                          |
| N4-Gd1-Cl3  | 115.8(1)                                                          | N9-Gd2-N5   | 79.4(2)                                                           |
| N5-Gd1-Cl1  | 129.2(1)                                                          | N11-Gd2-N7  | 76.1(2)                                                           |
| N5-Gd1-Cl2  | 118.1(1)                                                          | N11-Gd2-N10 | 62.7(2)                                                           |

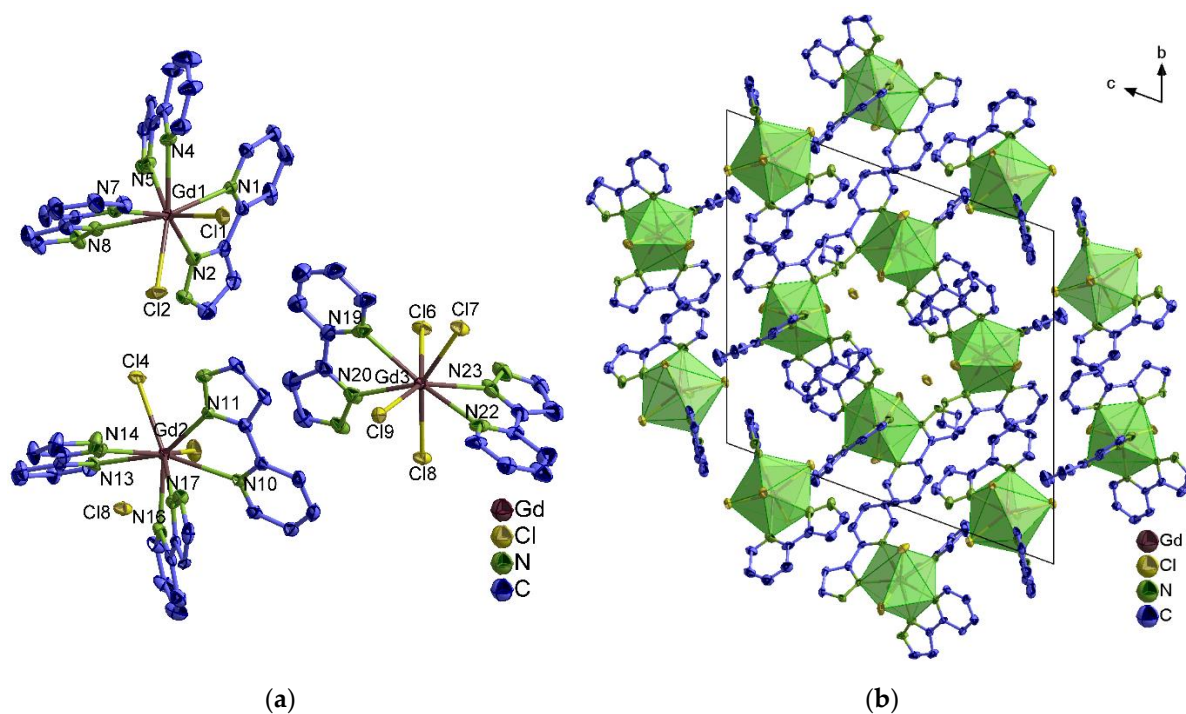

**Figure S4.** (a) Extended coordination sphere of Gd<sup>3+</sup> ion in [Gd<sub>3</sub>(2-PyPzH)<sub>8</sub>Cl<sub>8</sub>]Cl (17). (b) Packing structure of 17 with a view along [100].

**Table S12.** Selected interatomic distances (pm) and angles (°) of [Gd<sub>3</sub>(2-PyPzH)<sub>8</sub>Cl<sub>8</sub>]Cl (17).

| Atoms   | [Gd <sub>3</sub> (2-PyPzH) <sub>8</sub> Cl <sub>8</sub> ]Cl | Atoms       | [Gd <sub>3</sub> (2-PyPzH) <sub>8</sub> Cl <sub>8</sub> ]Cl |
|---------|-------------------------------------------------------------|-------------|-------------------------------------------------------------|
| Gd1–Cl1 | 265.5(2)                                                    | N14–Gd2–Cl5 | 147.5(3)                                                    |
| Gd1–Cl2 | 271.1(2)                                                    | N16–Gd2–Cl4 | 150.8(1)                                                    |
| Gd2–Cl4 | 271.1(2)                                                    | N16–Gd2–Cl5 | 83.6(1)                                                     |
| Gd2–Cl5 | 266.2(2)                                                    | N17–Gd2–Cl4 | 135.8(1)                                                    |
| Gd3–Cl6 | 271.5(2)                                                    | N17–Gd2–Cl5 | 135.5(1)                                                    |
| Gd3–Cl7 | 271.3(2)                                                    | N19–Gd3–Cl6 | 71.9(1)                                                     |
| Gd3–Cl8 | 276.2(2)                                                    | N19–Gd3–Cl7 | 78.9(2)                                                     |
| Gd3–Cl9 | 273.3(2)                                                    | N19–Gd3–Cl8 | 132.2(2)                                                    |
| Gd1–N1  | 268.4(5)                                                    | N19–Gd3–Cl9 | 75.1(1)                                                     |
| Gd1–N2  | 249.0(5)                                                    | N20–Gd3–Cl6 | 76.8(1)                                                     |
| Gd1–N4  | 259.7(5)                                                    | N20–Gd3–Cl7 | 141.0(2)                                                    |
| Gd1–N5  | 260.3(5)                                                    | N20–Gd3–Cl8 | 70.4(2)                                                     |
| Gd1–N7  | 259.8(5)                                                    | N20–Gd3–Cl9 | 81.3(1)                                                     |
| Gd1–N8  | 251.4(5)                                                    | N22–Gd3–Cl6 | 131.9(2)                                                    |
| Gd2–N10 | 263.3(5)                                                    | N22–Gd3–Cl7 | 76.5(1)                                                     |
| Gd2–N11 | 247.2(5)                                                    | N22–Gd3–Cl8 | 73.9(1)                                                     |
| Gd2–N13 | 259.0(2)                                                    | N22–Gd3–Cl9 | 80.8(2)                                                     |
| Gd2–N14 | 260.0(2)                                                    | N23–Gd3–Cl6 | 72.2(2)                                                     |
| Gd2–N16 | 257.9(5)                                                    | N23–Gd3–Cl7 | 83.4(1)                                                     |
| Gd2–N17 | 259.2(5)                                                    | N23–Gd3–Cl8 | 73.7(1)                                                     |
| Gd3–N19 | 266.5(5)                                                    | N23–Gd3–Cl9 | 141.6(2)                                                    |

|             |          |             |          |
|-------------|----------|-------------|----------|
| Gd3-N20     | 256.8(6) | N2-Gd1-N1   | 62.3(2)  |
| Gd3-N22     | 264.1(6) | N2-Gd1-N5   | 86.5(2)  |
| Gd3-N23     | 258.1(6) | N2-Gd1-N7   | 144.1(2) |
| N2-Gd1-N8   | 91.1(2)  | N4-Gd1-N1   | 78.9(2)  |
| N2-Gd1-N4   | 138.5(2) | N4-Gd1-N5   | 63.1(2)  |
| N8-Gd1-N4   | 104.5(2) | N4-Gd1-N7   | 75.8(2)  |
| Cl1-Gd1-Cl2 | 82.1(1)  | N5-Gd1-N1   | 65.2(2)  |
| Cl5-Gd2-Cl4 | 87.1(1)  | N7-Gd1-N1   | 153.6(2) |
| Cl6-Gd3-Cl8 | 105.0(1) | N7-Gd1-N5   | 108.7(2) |
| Cl6-Gd3-Cl9 | 146.2(1) | N8-Gd1-N1   | 130.5(2) |
| Cl7-Gd3-Cl6 | 87.5(1)  | N8-Gd1-N7   | 64.6(2)  |
| Cl7-Gd3-Cl8 | 148.6(1) | N8-Gd1-N5   | 72.7(2)  |
| Cl7-Gd3-Cl9 | 93.6(1)  | N11-Gd2-N10 | 63.7(2)  |
| Cl9-Gd3-Cl8 | 91.4(1)  | N11-Gd2-N13 | 148.8(5) |
| N1-Gd1-Cl1  | 82.6(1)  | N11-Gd2-N14 | 96.2(3)  |
| N1-Gd1-Cl2  | 126.1(1) | N11-Gd2-N16 | 132.8(2) |
| N2-Gd1-Cl1  | 107.8(1) | N11-Gd2-N17 | 78.8(2)  |
| N2-Gd1-Cl2  | 74.1(1)  | N13-Gd2-N10 | 147.4(5) |
| N4-Gd1-Cl1  | 79.3(2)  | N13-Gd2-N14 | 63.0(3)  |
| N4-Gd1-Cl2  | 146.4(1) | N14-Gd2-N10 | 135.0(3) |
| N5-Gd1-Cl1  | 133.7(1) | N16-Gd2-N10 | 75.5(2)  |
| N5-Gd1-Cl2  | 143.7(1) | N16-Gd2-N13 | 75.4(6)  |
| N7-Gd1-Cl1  | 85.4(1)  | N16-Gd2-N14 | 96.6(4)  |
| N7-Gd1-Cl2  | 75.0(1)  | N16-Gd2-N17 | 63.6(2)  |
| N8-Gd1-Cl1  | 147(1)   | N17-Gd2-N10 | 66.9(2)  |
| N8-Gd1-Cl2  | 77.3(1)  | N17-Gd2-N13 | 111.7(5) |
| N10-Gd2-Cl4 | 129(1)   | N17-Gd2-N14 | 70.0(4)  |
| N10-Gd2-Cl5 | 76.7(1)  | N20-Gd3-N19 | 62.4(2)  |
| N11-Gd2-Cl4 | 76.3(1)  | N20-Gd3-N22 | 139.3(2) |
| N11-Gd2-Cl5 | 107.5(1) | N20-Gd3-N23 | 123.6(2) |
| N13-Gd2-Cl4 | 76.4(6)  | N22-Gd3-N19 | 144.1(2) |
| N13-Gd2-Cl5 | 85.9(3)  | N23-Gd3-N19 | 140.4(2) |
| N14-Gd2-Cl4 | 77.0(4)  | N23-Gd3-N22 | 61.2(2)  |

---

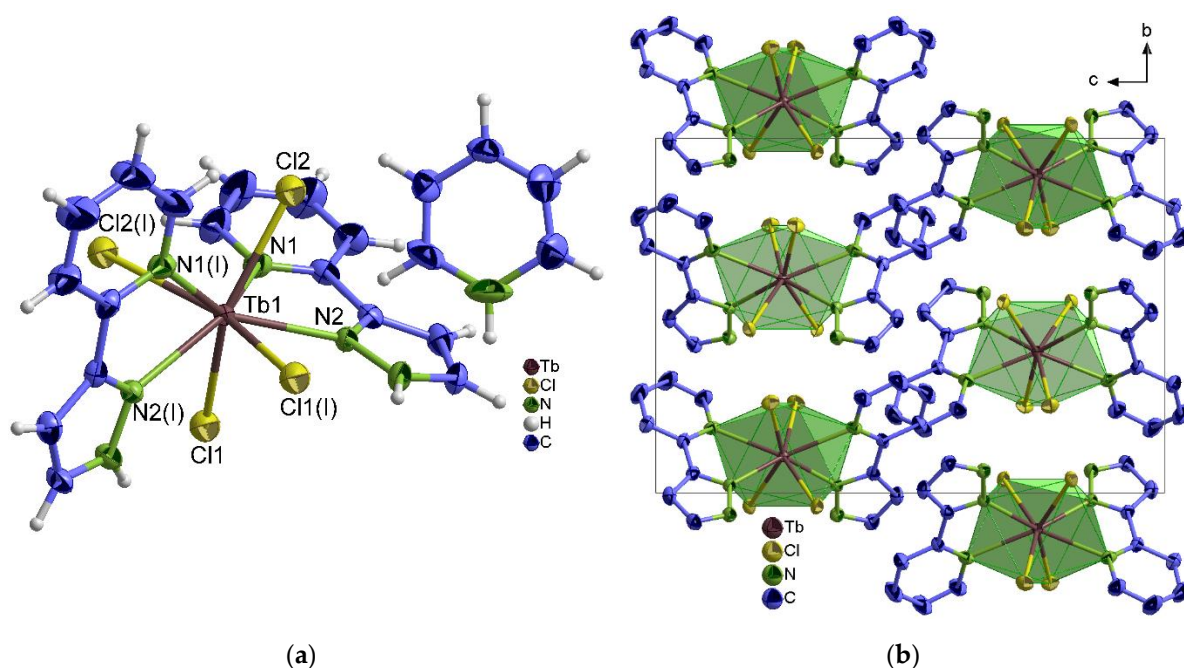

**Figure S5.** (a) Extended coordination sphere of  $\text{Tb}^{3+}$  ion in  $[\text{PyH}][\text{Tb}(2\text{-PyPzH})_2\text{Cl}_4]$  (**18**). (b) Packing structure of **18** with a view along  $[100]$ , the protonated pyridine molecules were omitted for clarity. Symmetry operation:  $I -x+1, y, -z+3/2$ .

**Table S13.** Selected interatomic distances (pm) and angles ( $^\circ$ ) of  $[\text{PyH}][\text{Tb}(2\text{-PyPzH})_2\text{Cl}_4]$  (**18**).

| Atoms                                  | $[\text{PyH}][\text{Tb}(2\text{-PyPzH})_2\text{Cl}_4]$ | Atoms                    | $[\text{PyH}][\text{Tb}(2\text{-PyPzH})_2\text{Cl}_4]$ |
|----------------------------------------|--------------------------------------------------------|--------------------------|--------------------------------------------------------|
| Tb1–Cl1                                | 272.0(1)                                               | N1–Tb1–Cl2               | 72.0(1)                                                |
| Tb1–Cl2                                | 269.8(1)                                               | N1 <sup>I</sup> –Tb1–Cl2 | 78.7(1)                                                |
| Tb1–N1                                 | 267.8(2)                                               | N1 <sup>I</sup> –Tb1–N1  | 136.9(1)                                               |
| Tb1–N2                                 | 252.2(2)                                               | N2 <sup>I</sup> –Tb1–N2  | 132.9(1)                                               |
| Cl1–Tb1–Cl1 <sup>I</sup>               | 100.7(1)                                               | N2–Tb1–N1                | 62.6(1)                                                |
| Cl2–Tb1–Cl1                            | 145.0(1)                                               | N2–Tb1–N1 <sup>I</sup>   | 138.9(1)                                               |
| Cl2–Tb1–Cl1 <sup>I</sup>               | 93.4(1)                                                | N2 <sup>I</sup> –Tb1–Cl2 | 141.3(1)                                               |
| Cl2 <sup>I</sup> –Tb1–Cl1 <sup>I</sup> | 145.0(1)                                               | N2–Tb1–Cl2               | 76.7(1)                                                |
| Cl2–Tb1–Cl2 <sup>I</sup>               | 92.9(1)                                                |                          |                                                        |

## Powder Diffraction

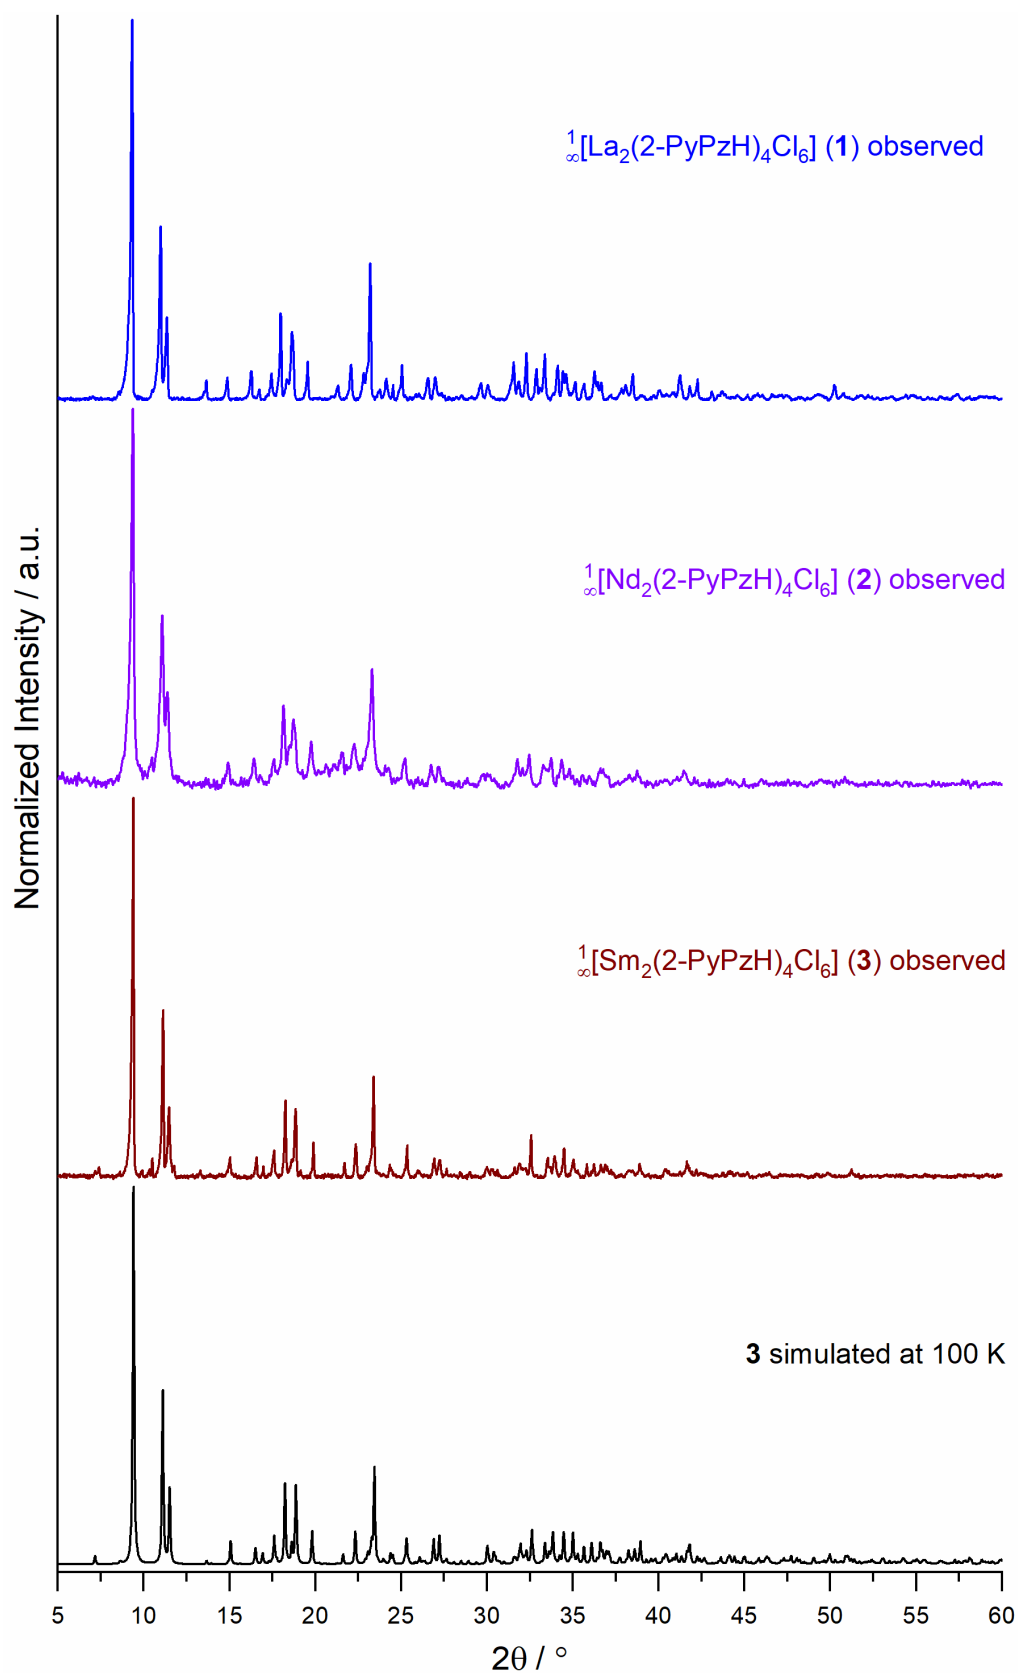

**Figure S6.** Comparison of the observed powder X-ray diffraction pattern (colored) of  ${}^1[\text{Ln}_2(2\text{-PyPzH})_4\text{Cl}_6]$ , RE = La (1), Nd (2), Sm (3) with the simulated diffraction pattern from the single crystal X-ray data of  ${}^1[\text{Sm}_2(2\text{-PyPzH})_4\text{Cl}_6]$  (3) (black).

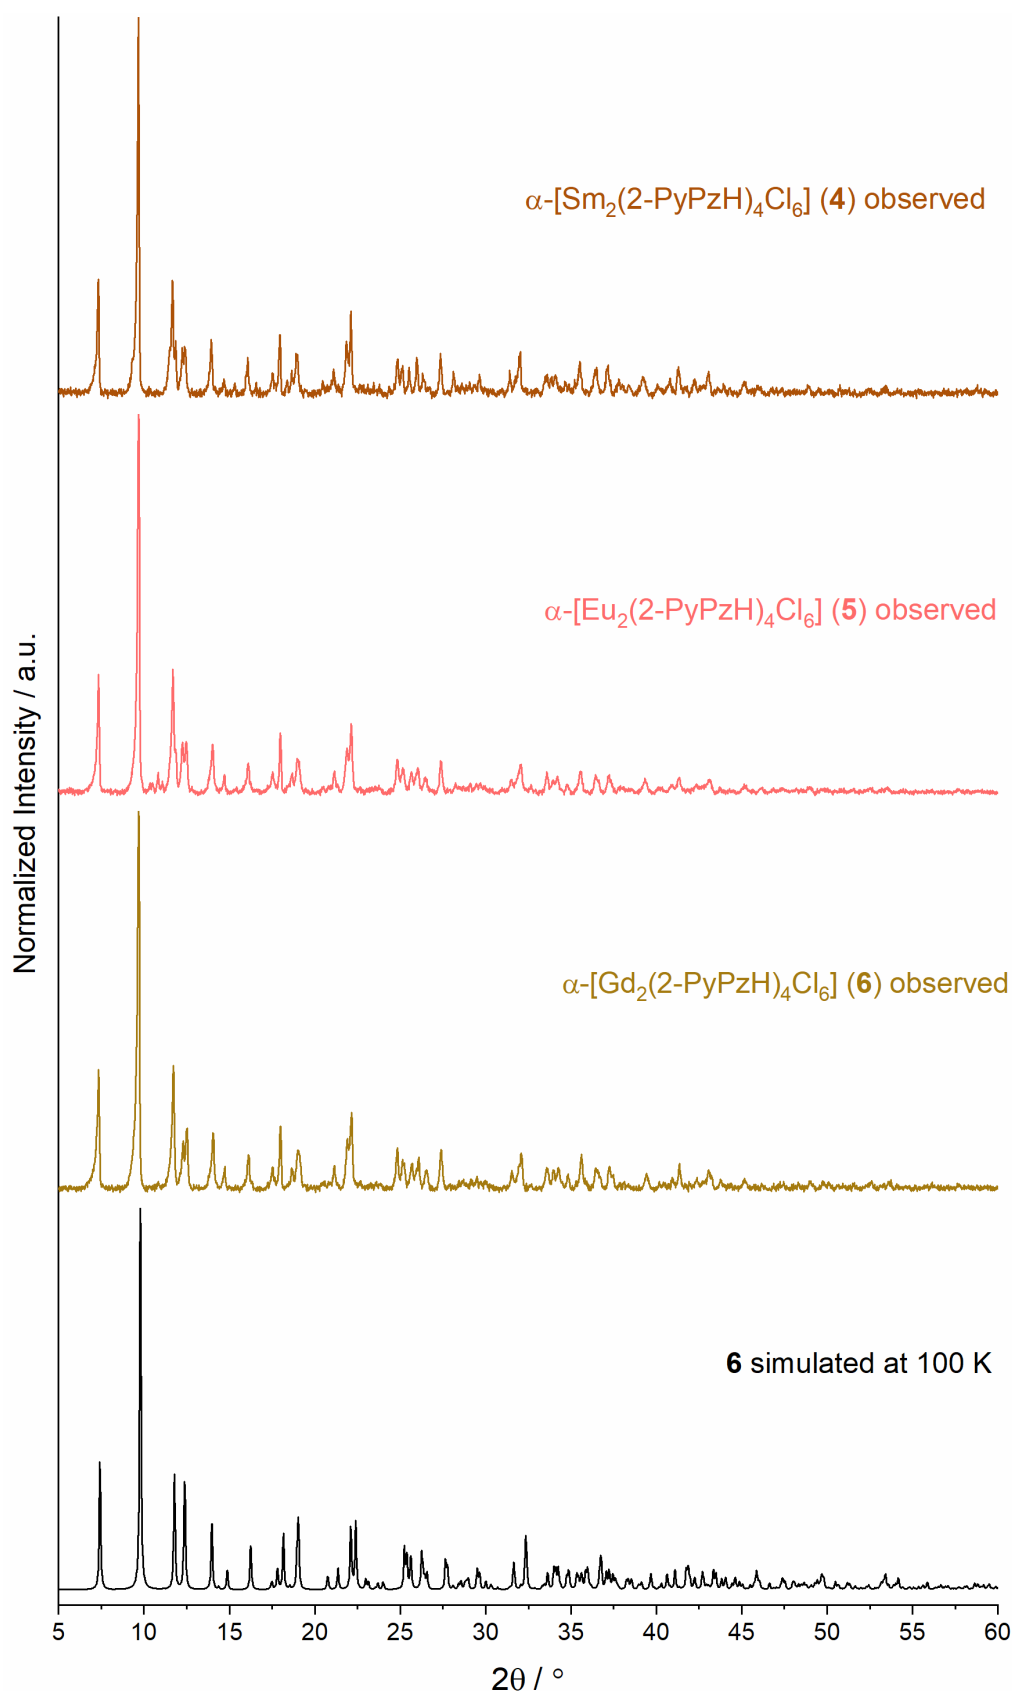

**Figure S7.** Comparison of the observed powder X-ray diffraction pattern (colored) of  $\alpha$ -[Ln<sub>2</sub>(2-PyPzH)<sub>4</sub>Cl<sub>6</sub>], Ln = Sm (4), Eu (5), Gd (6) with the simulated diffraction pattern from the single crystal X-ray data of  $\alpha$ -[Gd<sub>2</sub>(2-PyPzH)<sub>4</sub>Cl<sub>6</sub>] (6) (black).

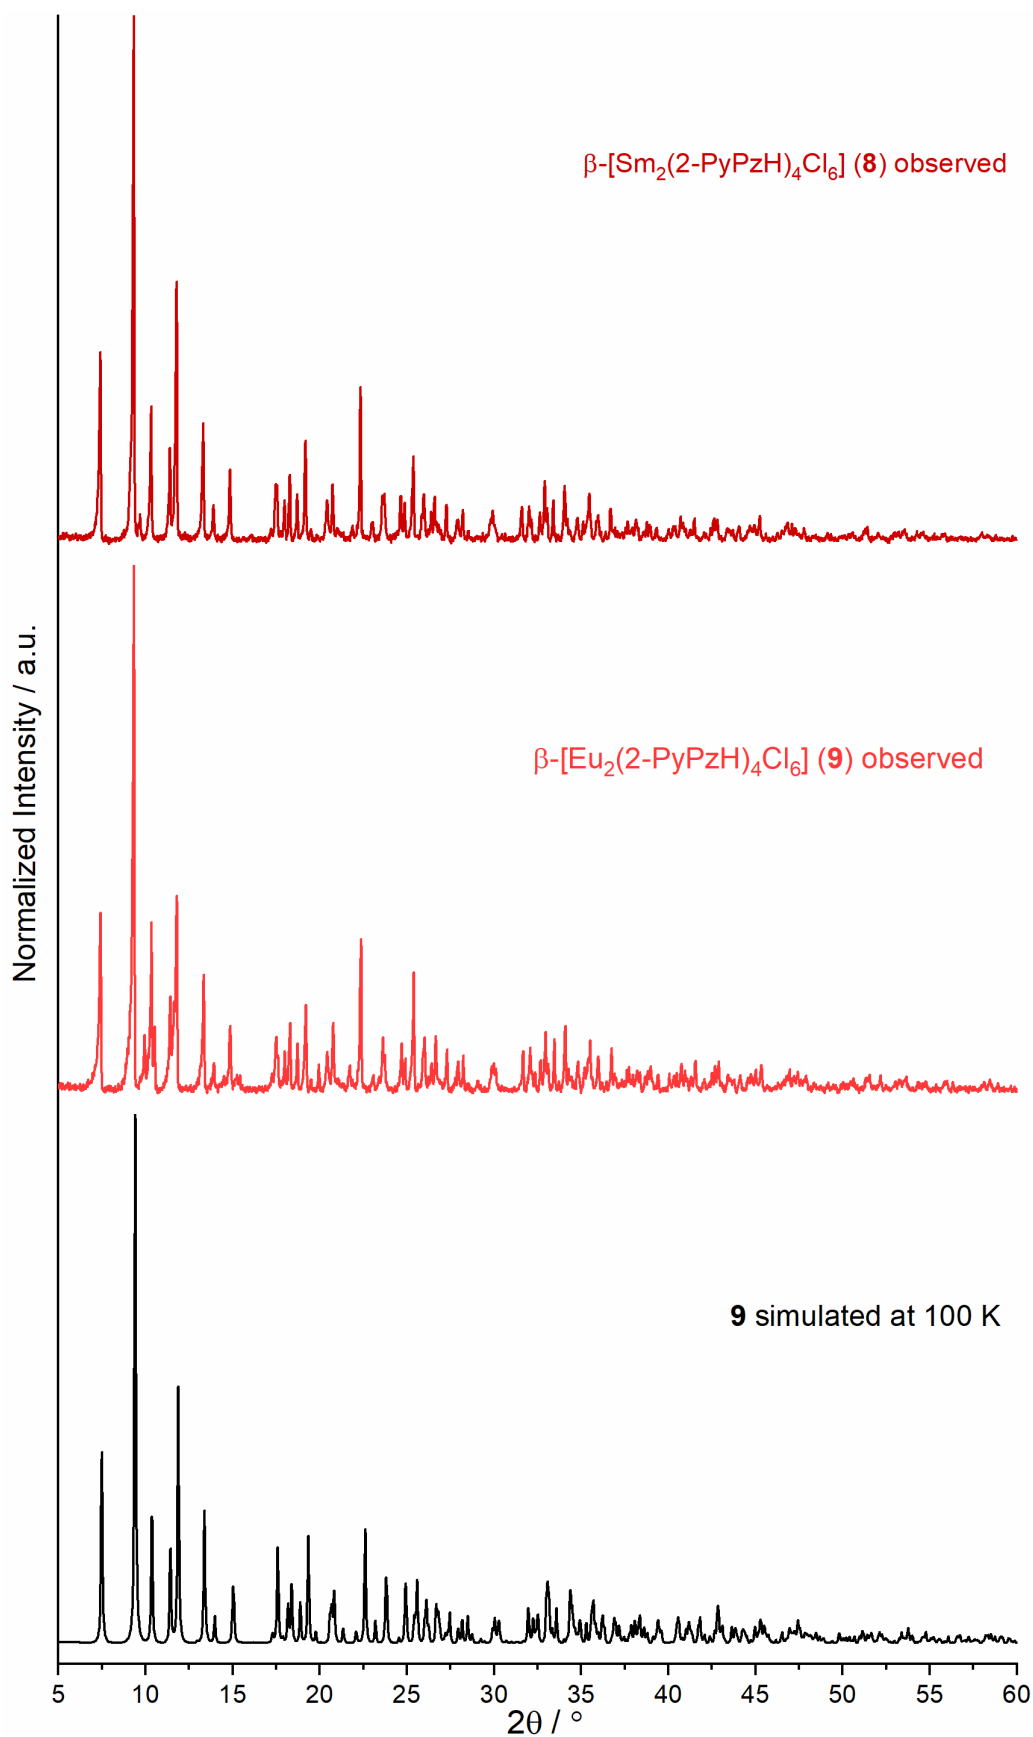

**Figure S8.** Comparison of the observed powder X-ray diffraction pattern (colored) of  $\beta$ -[Ln<sub>2</sub>(2-PyPzH)<sub>4</sub>Cl<sub>6</sub>], Ln = Sm (8), Eu (9) with the simulated diffraction pattern from the single crystal X-ray data of  $\beta$ -[Eu<sub>2</sub>(2-PyPzH)<sub>4</sub>Cl<sub>6</sub>] (9) (black).

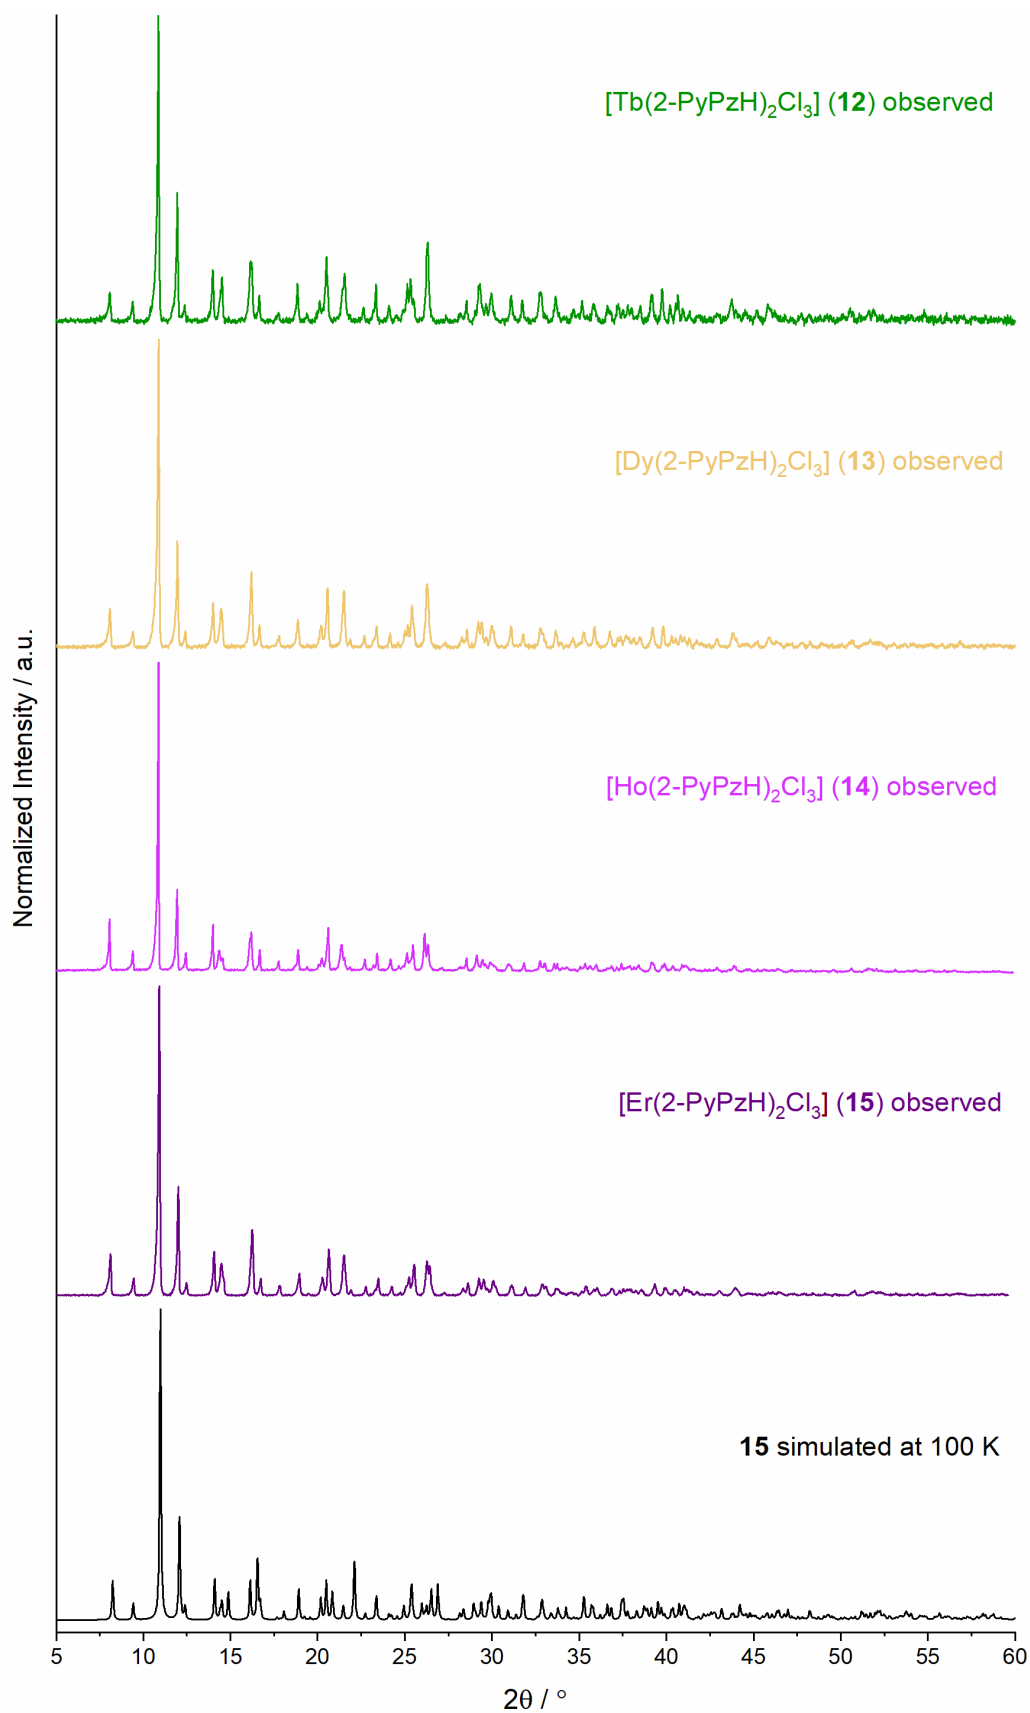

**Figure S9.** Comparison of the observed powder X-ray diffraction pattern (colored) of  $[\text{Ln}(2\text{-PyPzH})_2\text{Cl}_3]$ ,  $\text{Ln} = \text{Tb}$  (**12**),  $\text{Dy}$  (**13**),  $\text{Ho}$  (**14**), and  $\text{Er}$  (**15**) with the simulated diffraction pattern from the single crystal X-ray data of  $[\text{Er}(2\text{-PyPzH})_2\text{Cl}_3]$  (**15**) (black).

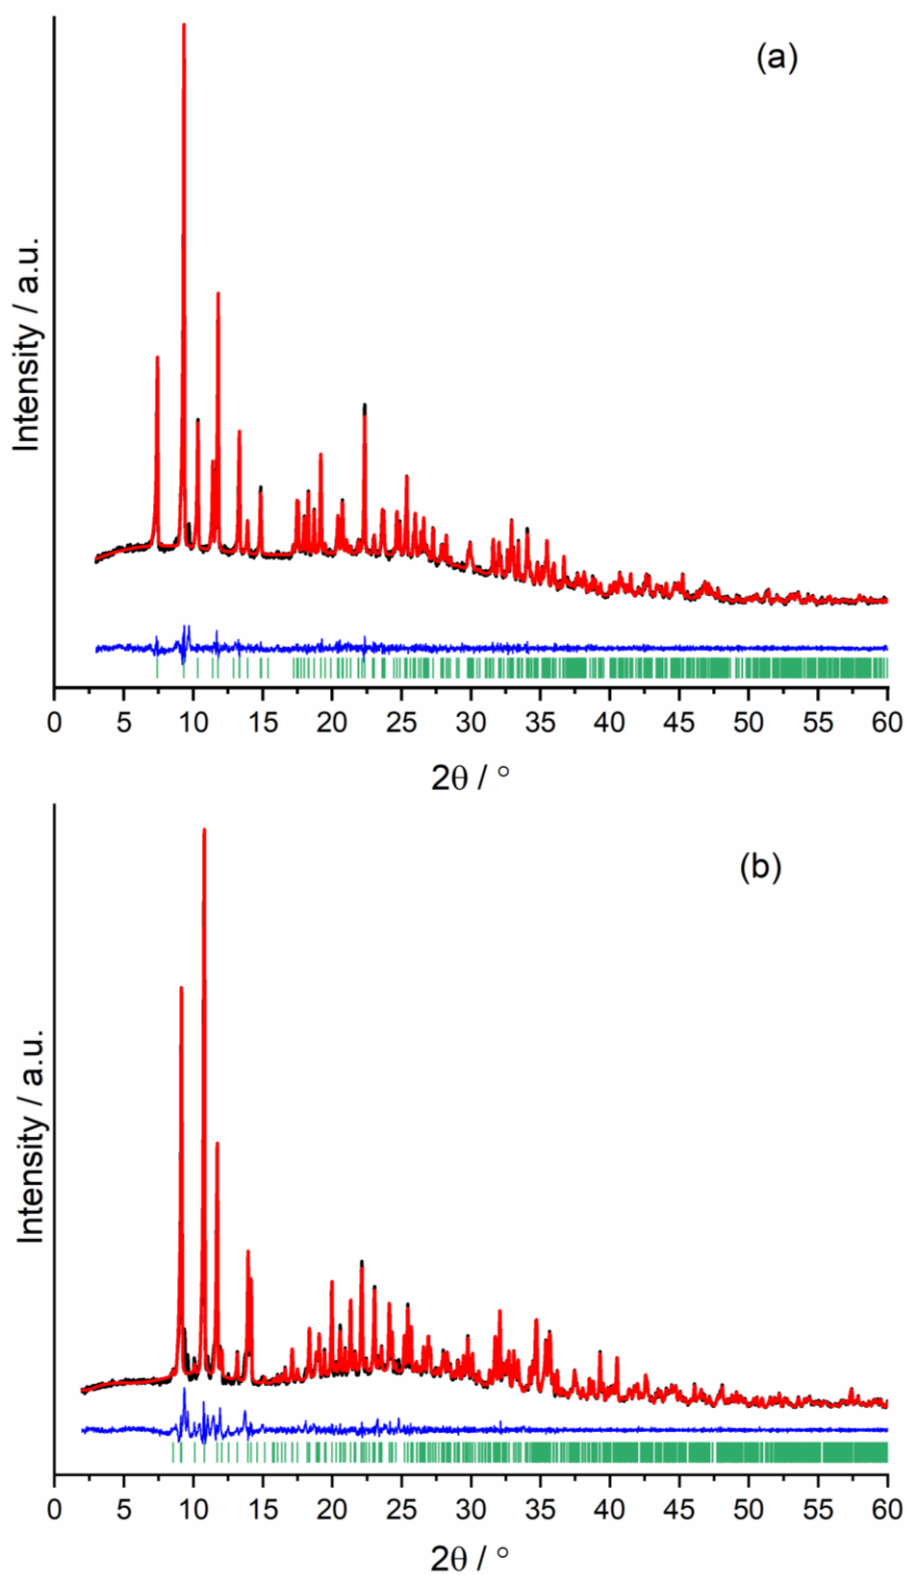

**Figure S10.** Pawley refinement of (a)  $\beta$ -[Sm<sub>2</sub>(2-PyPzH)<sub>4</sub>Cl<sub>6</sub>] (**8**) with a GOF of 1.16, (b) [Ce(2-PyPzH)<sub>3</sub>Cl<sub>3</sub>] (**11**) with a GOF of 1.87. The experimental data are shown in black, Pawley fit in red, the corresponding difference plot in blue, and the hkl position markers in green.

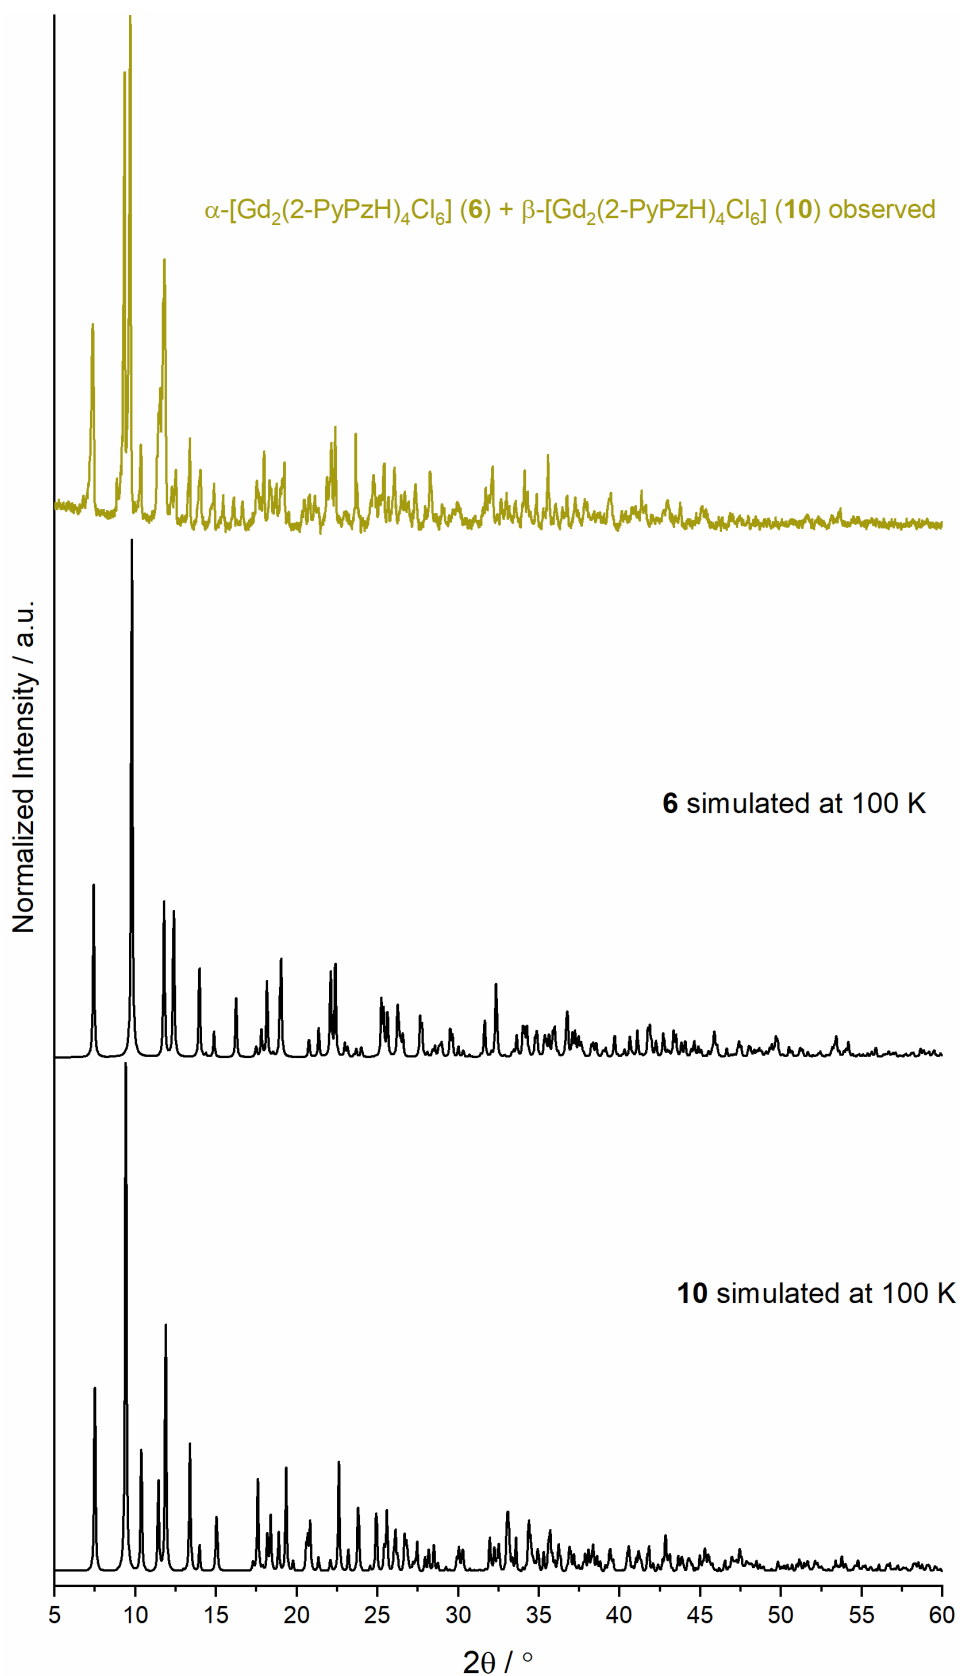

**Figure S11.** Comparison of the observed powder X-ray diffraction pattern (colored) of a mixture of  $\alpha$ -[Gd<sub>2</sub>(2-PyPzH)<sub>4</sub>Cl<sub>6</sub>] (**6**) and  $\beta$ -[Gd<sub>2</sub>(2-PyPzH)<sub>4</sub>Cl<sub>6</sub>] (**10**) with the simulated diffraction pattern from the single crystal X-ray data at 100 K of  $\alpha$ -[Gd<sub>2</sub>(2-PyPzH)<sub>4</sub>Cl<sub>6</sub>] (**6**) and  $\beta$ -[Gd<sub>2</sub>(2-PyPzH)<sub>4</sub>Cl<sub>6</sub>] (**10**) (black).

## Photophysical Properties

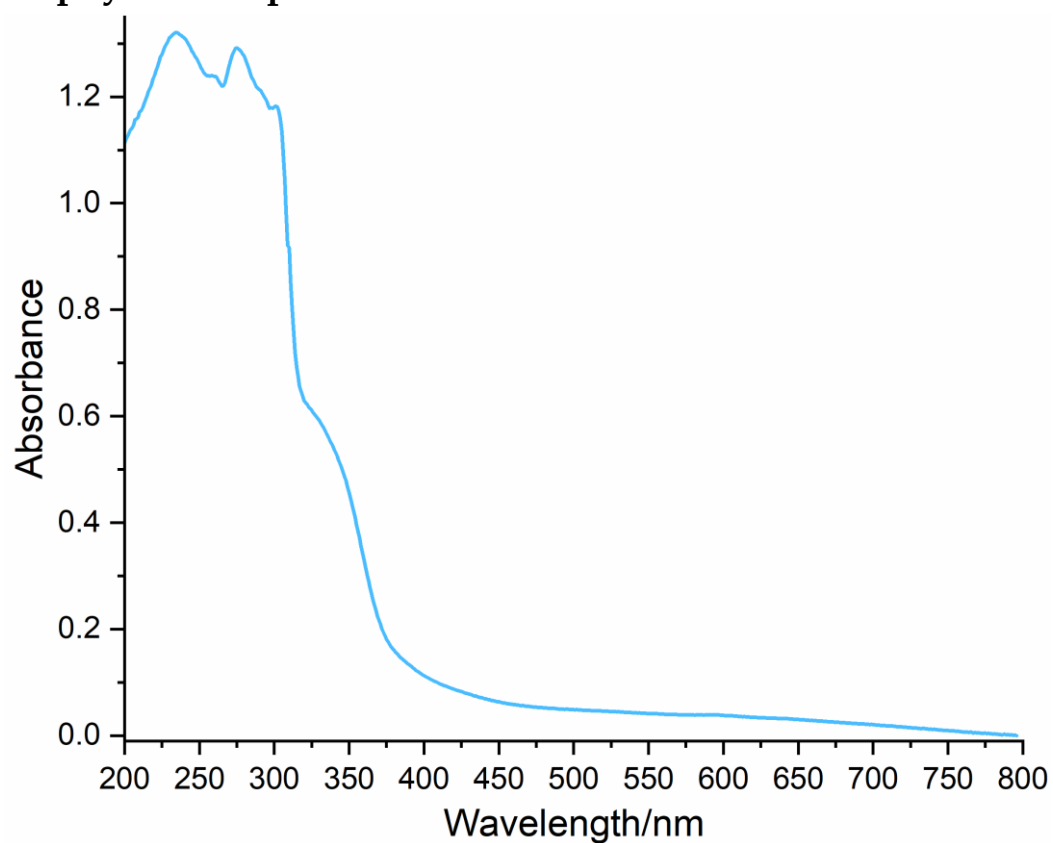

**Figure S12.** Absorption spectra of 2-PyPzH in the solid-state at room temperature.

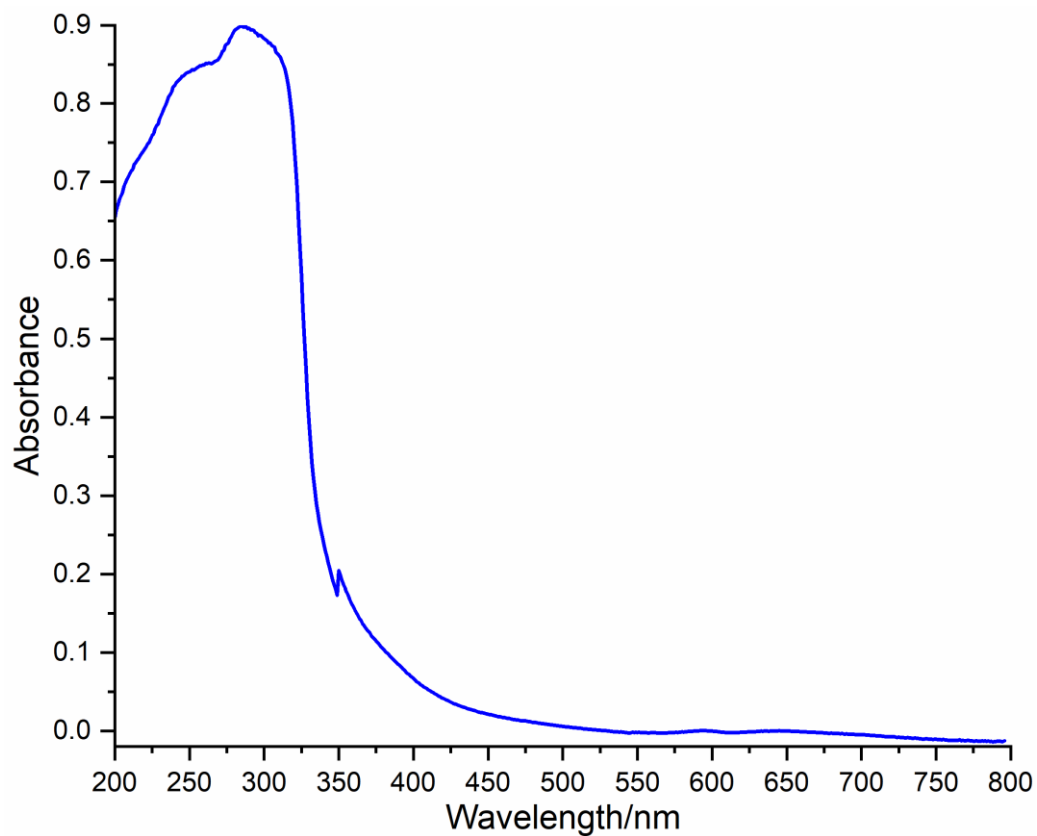

**Figure S13.** Absorption spectra of  $[La_2(2-PyPzH)_4Cl_6]$  (1) in the solid-state at room temperature.

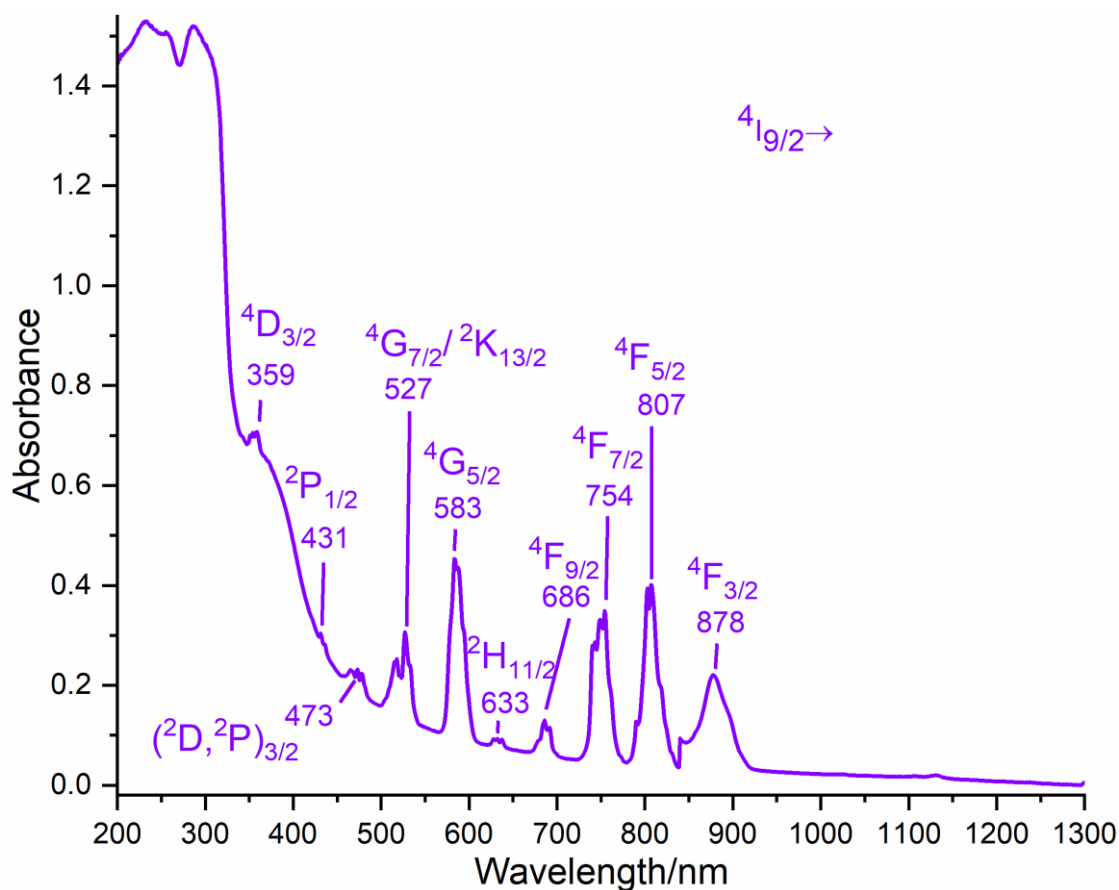

**Figure S14.** Absorption spectra of  $[\text{Nd}_2(2\text{-PyPzH})_4\text{Cl}_6]$  (2) in the solid-state at room temperature.

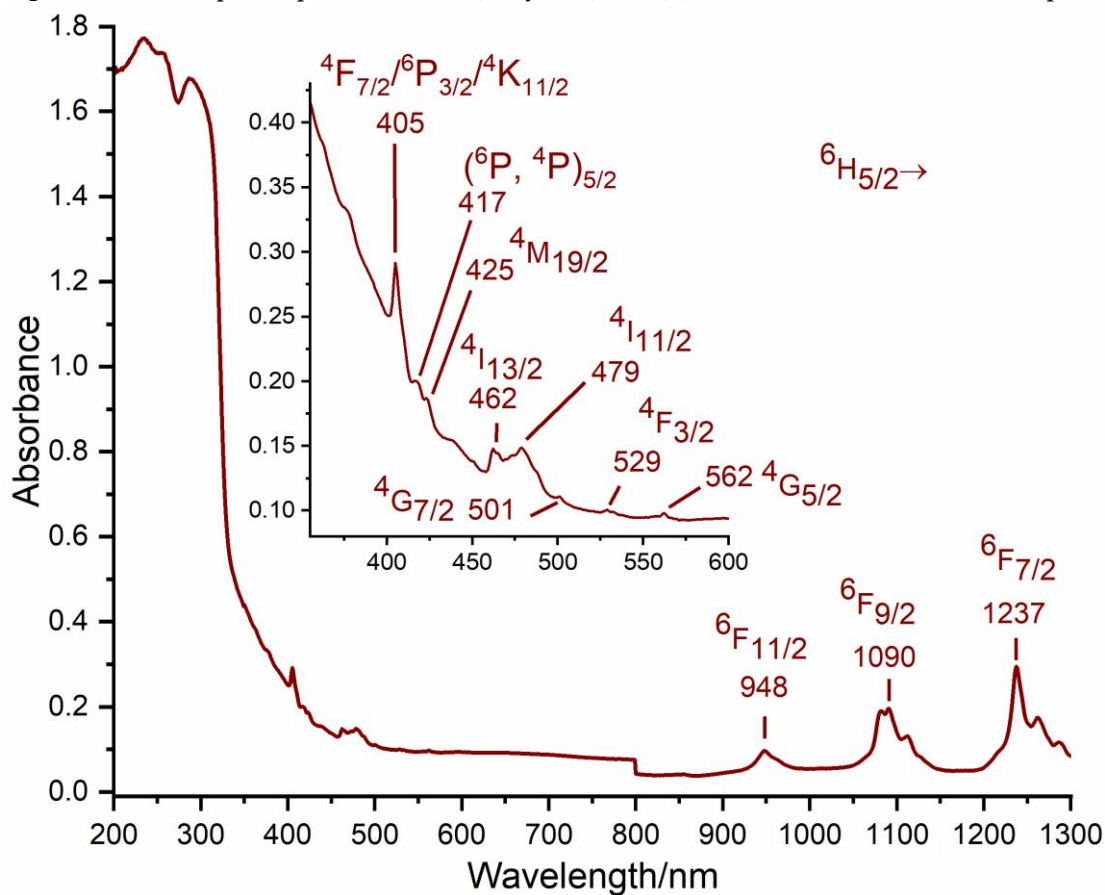

**Figure S15.** Absorption spectra of  $[\text{Sm}_2(2\text{-PyPzH})_4\text{Cl}_6]$  (3) in the solid-state at room temperature.

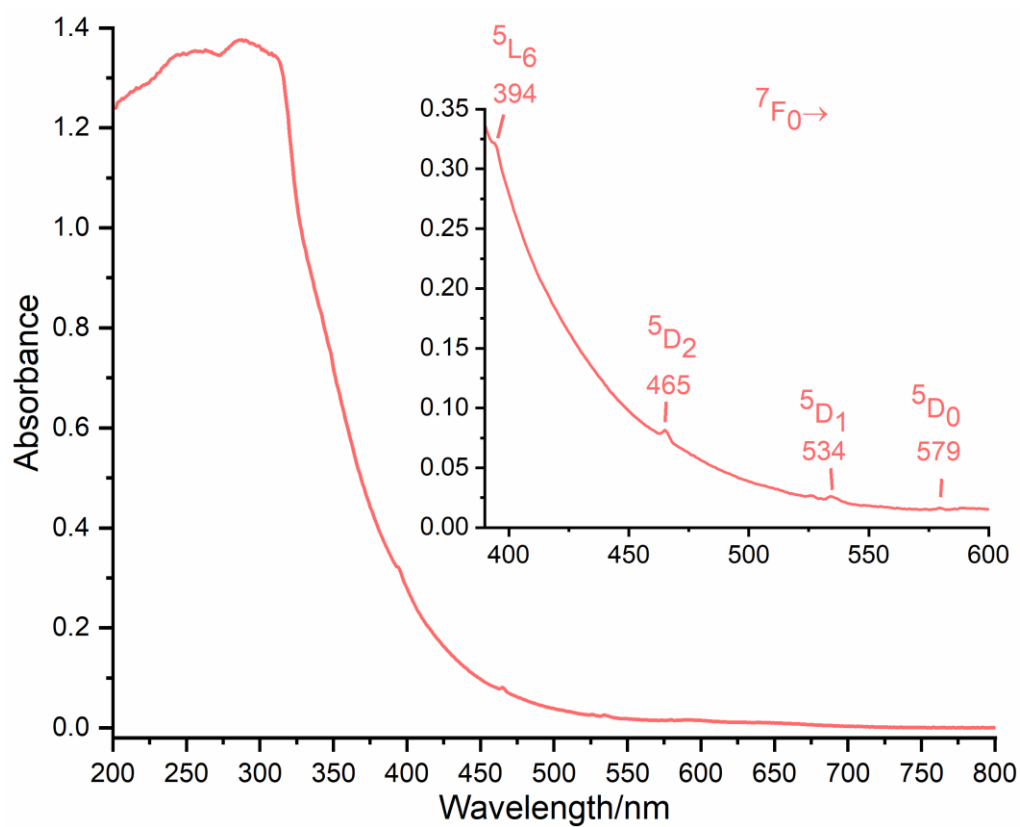

**Figure S16.** Absorption spectra of  $\alpha$ -[Eu<sub>2</sub>(2-PyPzH)<sub>4</sub>Cl<sub>6</sub>] (5) in the solid-state at room temperature.

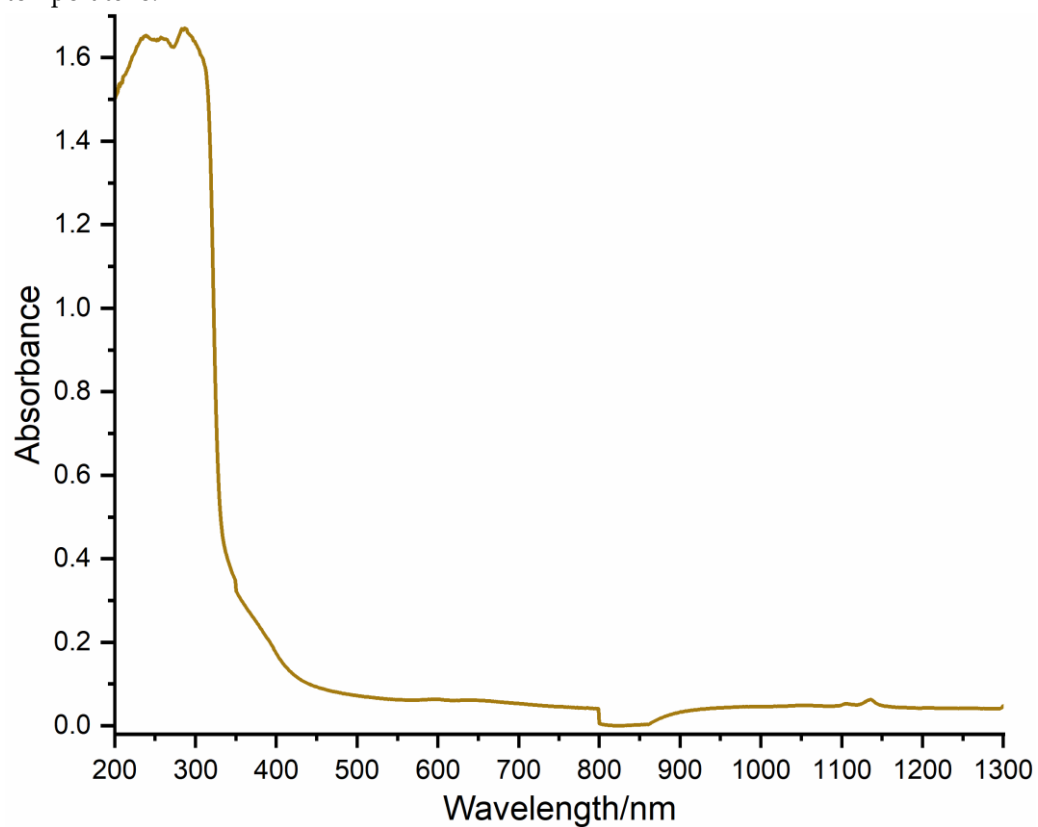

**Figure S17.** Absorption spectra of  $\alpha$ -[Gd<sub>2</sub>(2-PyPzH)<sub>4</sub>Cl<sub>6</sub>] (6) in the solid-state at room temperature.

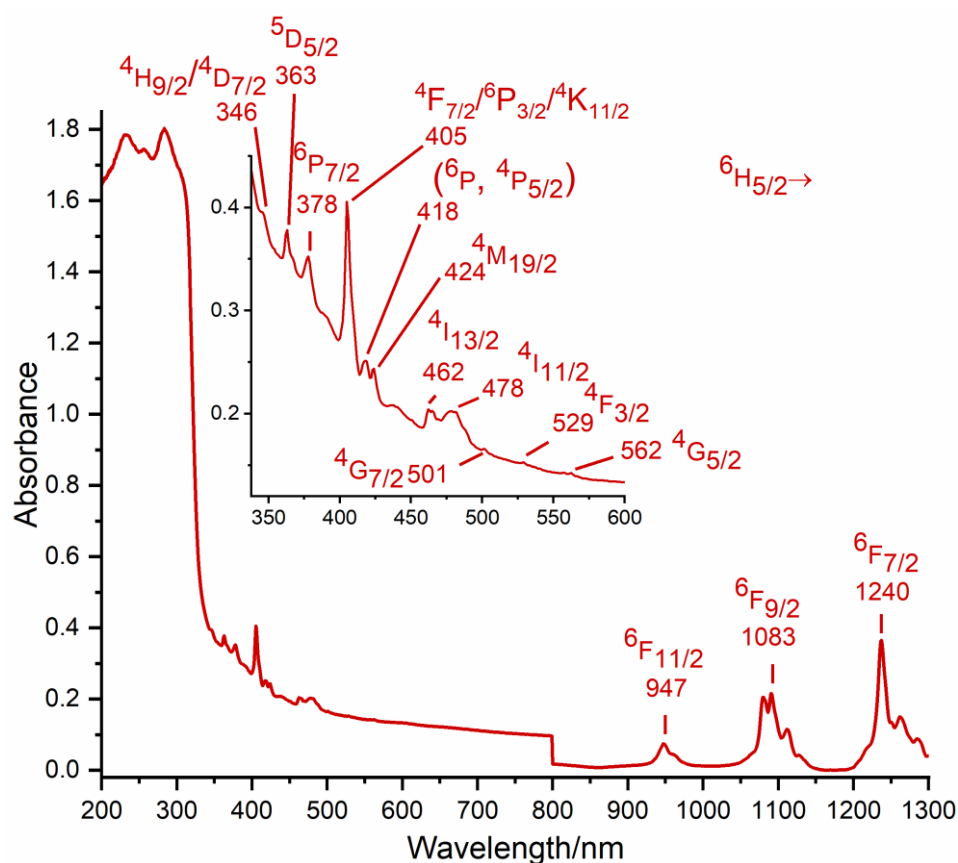

**Figure S18.** Absorption spectra of  $\beta$ -[Sm<sub>2</sub>(2-PyPzH)<sub>4</sub>Cl<sub>6</sub>] (8) in the solid-state at room temperature.

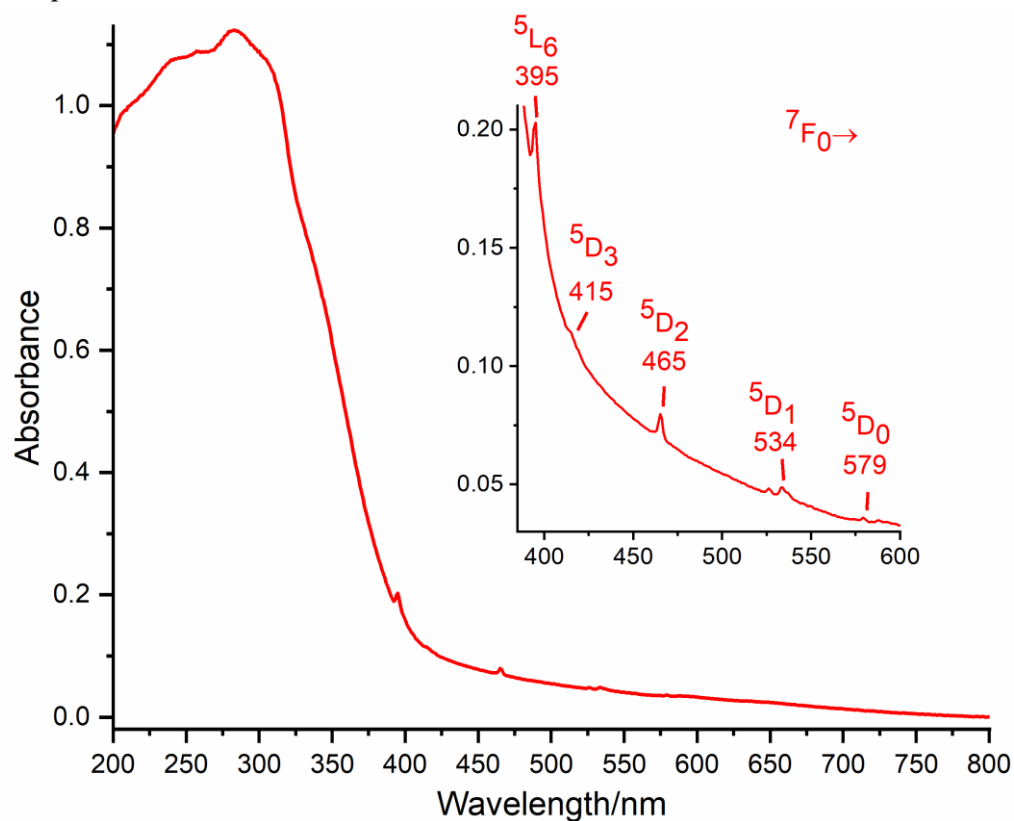

**Figure S19.** Absorption spectra of  $\beta$ -[Eu<sub>2</sub>(2-PyPzH)<sub>4</sub>Cl<sub>6</sub>] (9) in the solid-state at room temperature.

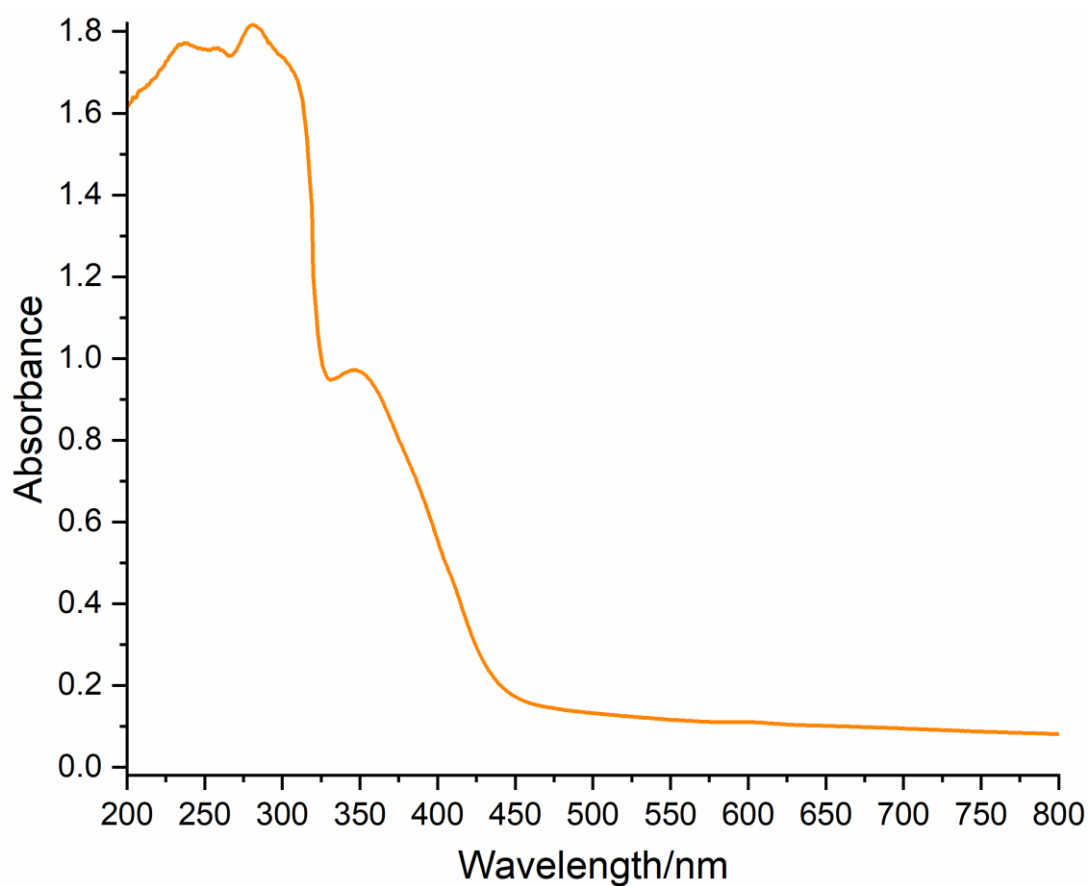

**Figure S20.** Absorption spectra of [Ce(2-PyPzH)<sub>3</sub>Cl<sub>3</sub>] (11) in the solid-state at room temperature.

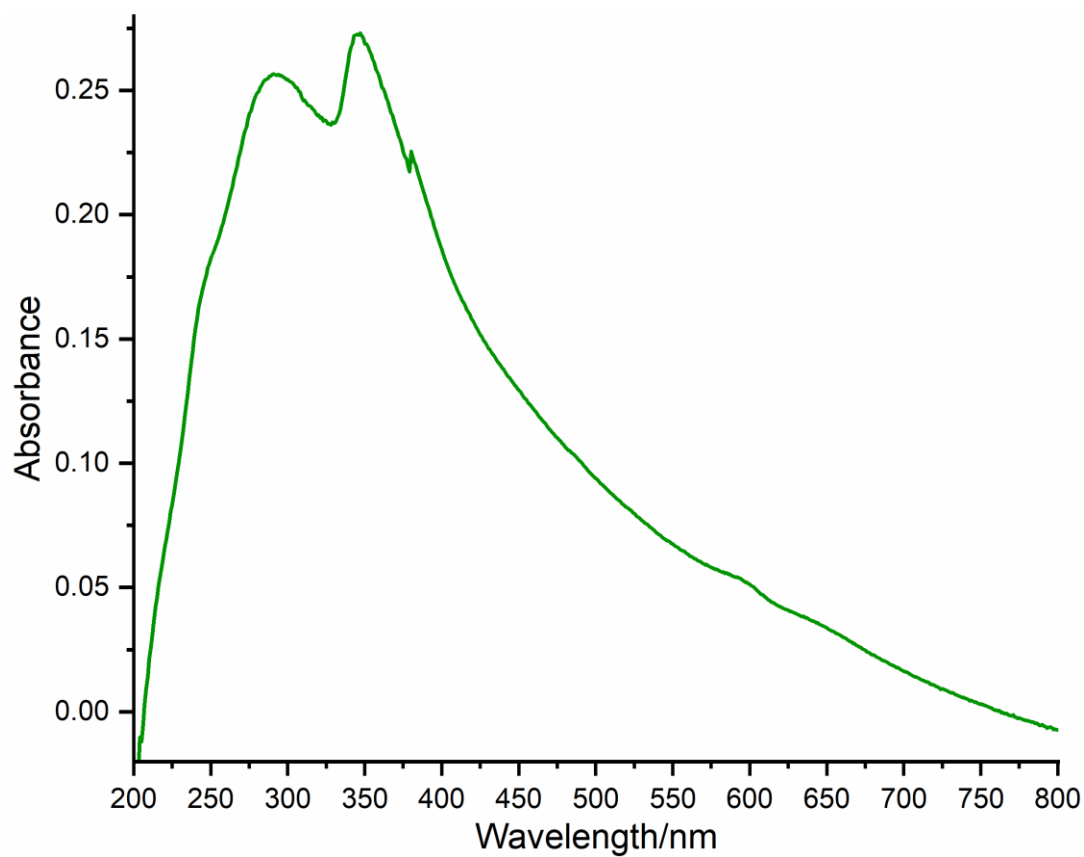

**Figure S21.** Absorption spectra of [Tb(2-PyPzH)<sub>2</sub>Cl<sub>3</sub>] (12) in the solid-state at room temperature.

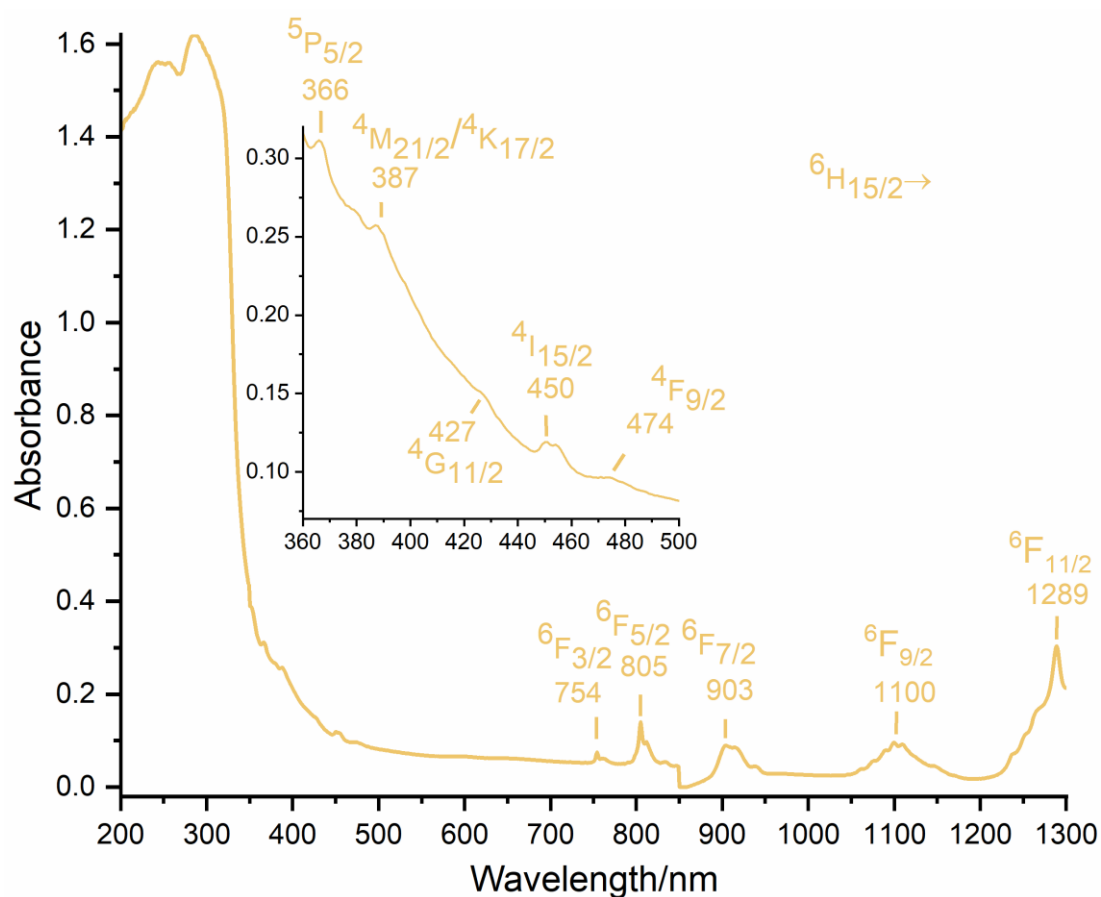

Figure S22. Absorption spectra of [Dy(2-PyPzH)<sub>2</sub>Cl<sub>3</sub>] (13) in the solid-state at room temperature.

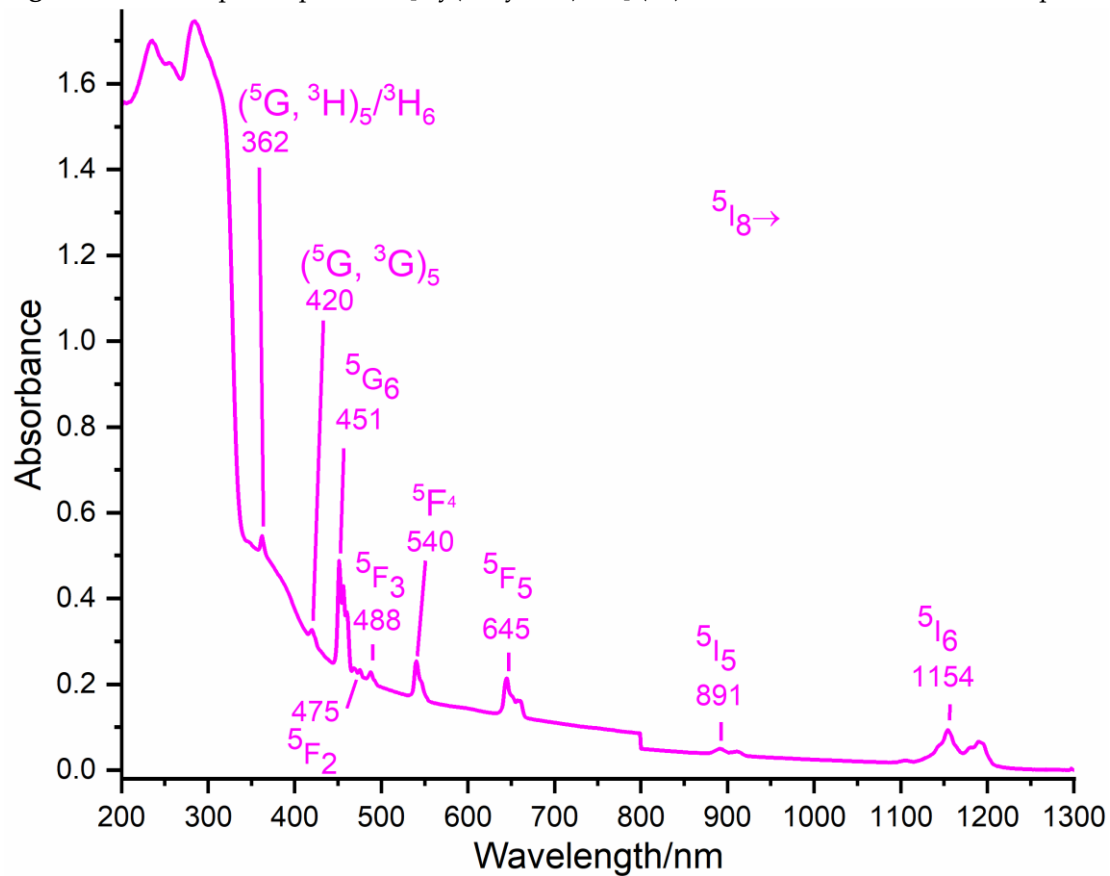

Figure S23. Absorption spectra of [Ho(2-PyPzH)<sub>2</sub>Cl<sub>3</sub>] (14) in the solid-state at room temperature.

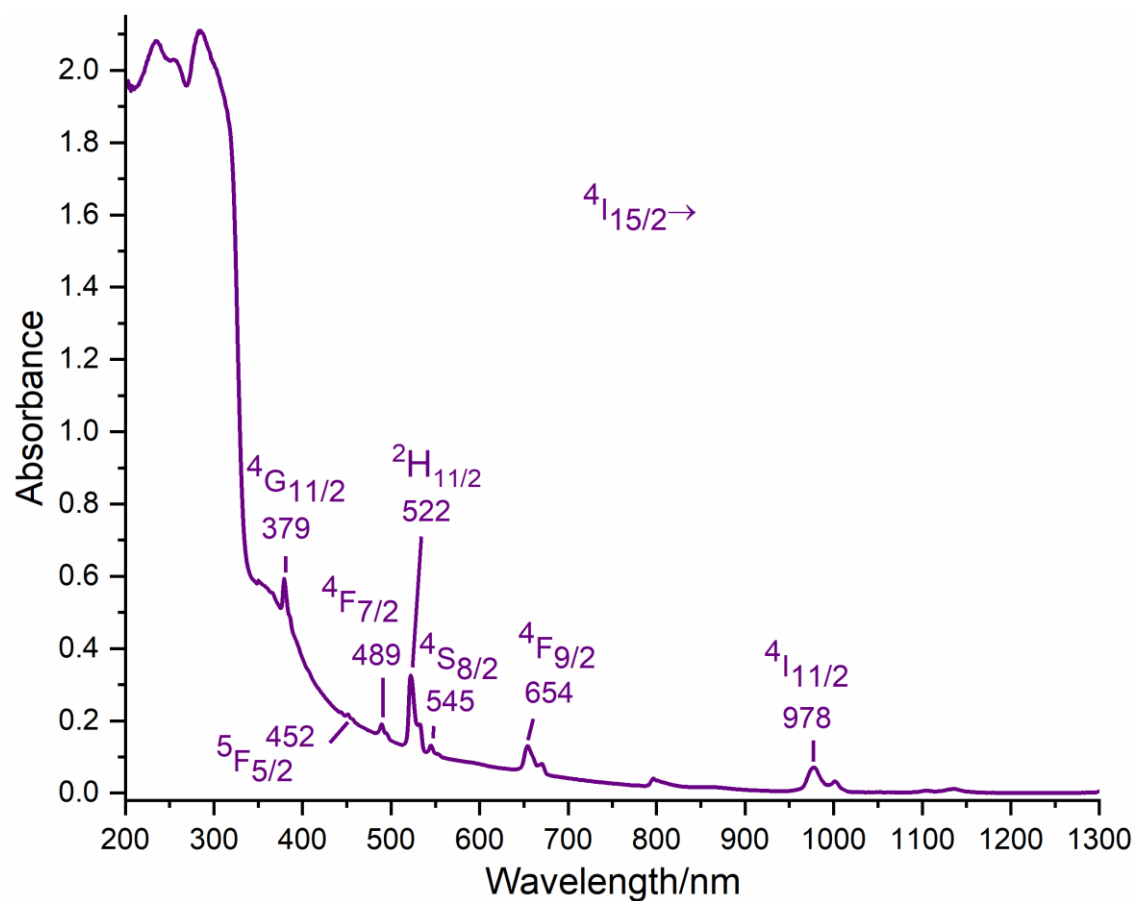

**Figure S24.** Absorption spectra of  $[\text{Er}(\text{2-PyPzH})_2\text{Cl}_3]$  (15) in the solid-state at room temperature.

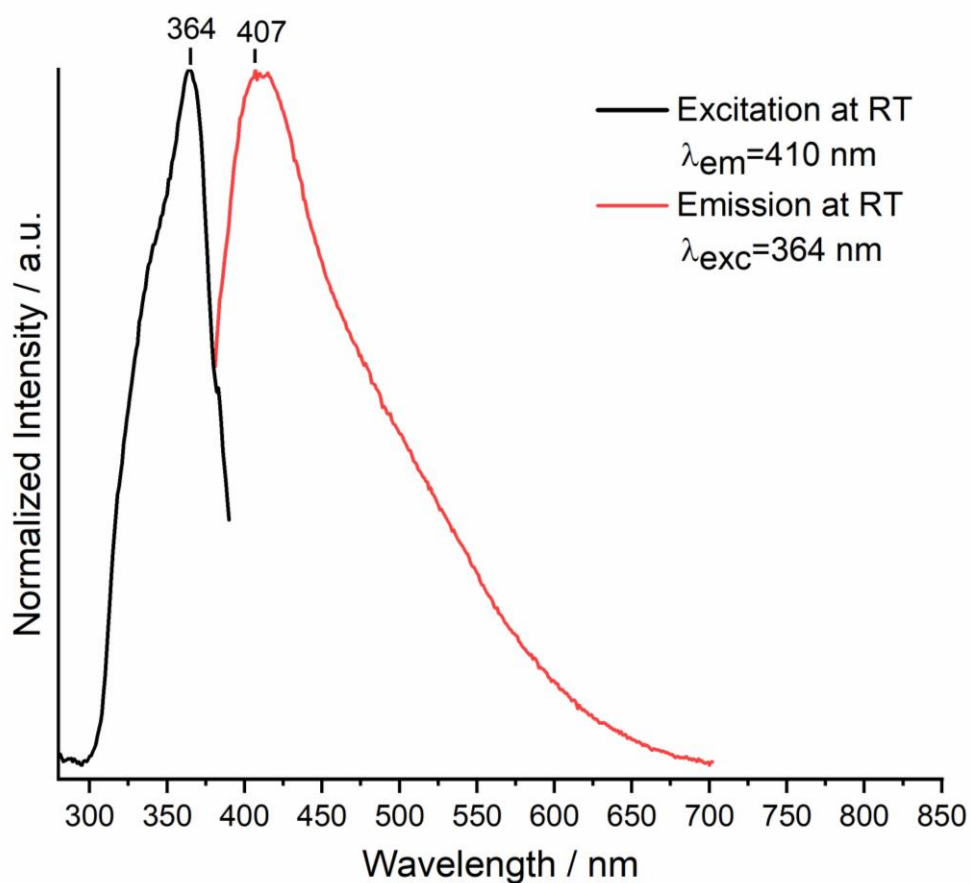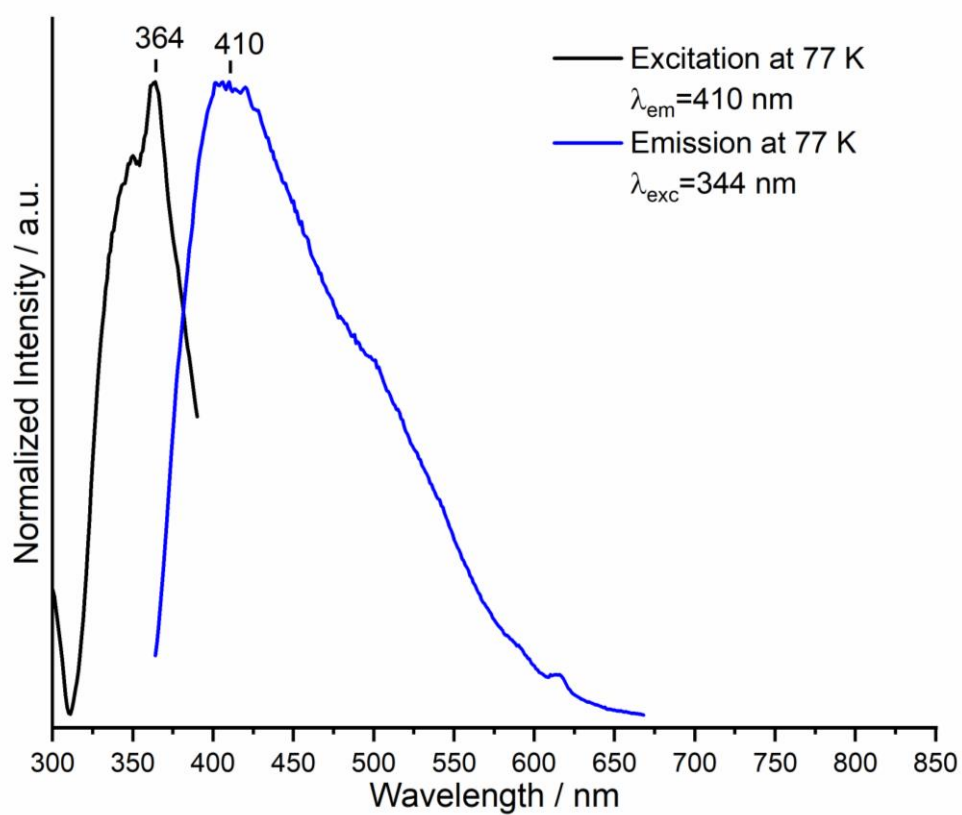

**Figure S25.** Normalized excitation and emission spectra of 2-PyPzH at room temperature (top) and 77 K (bottom). Wavelengths at which the spectra were recorded are reported in the legends.

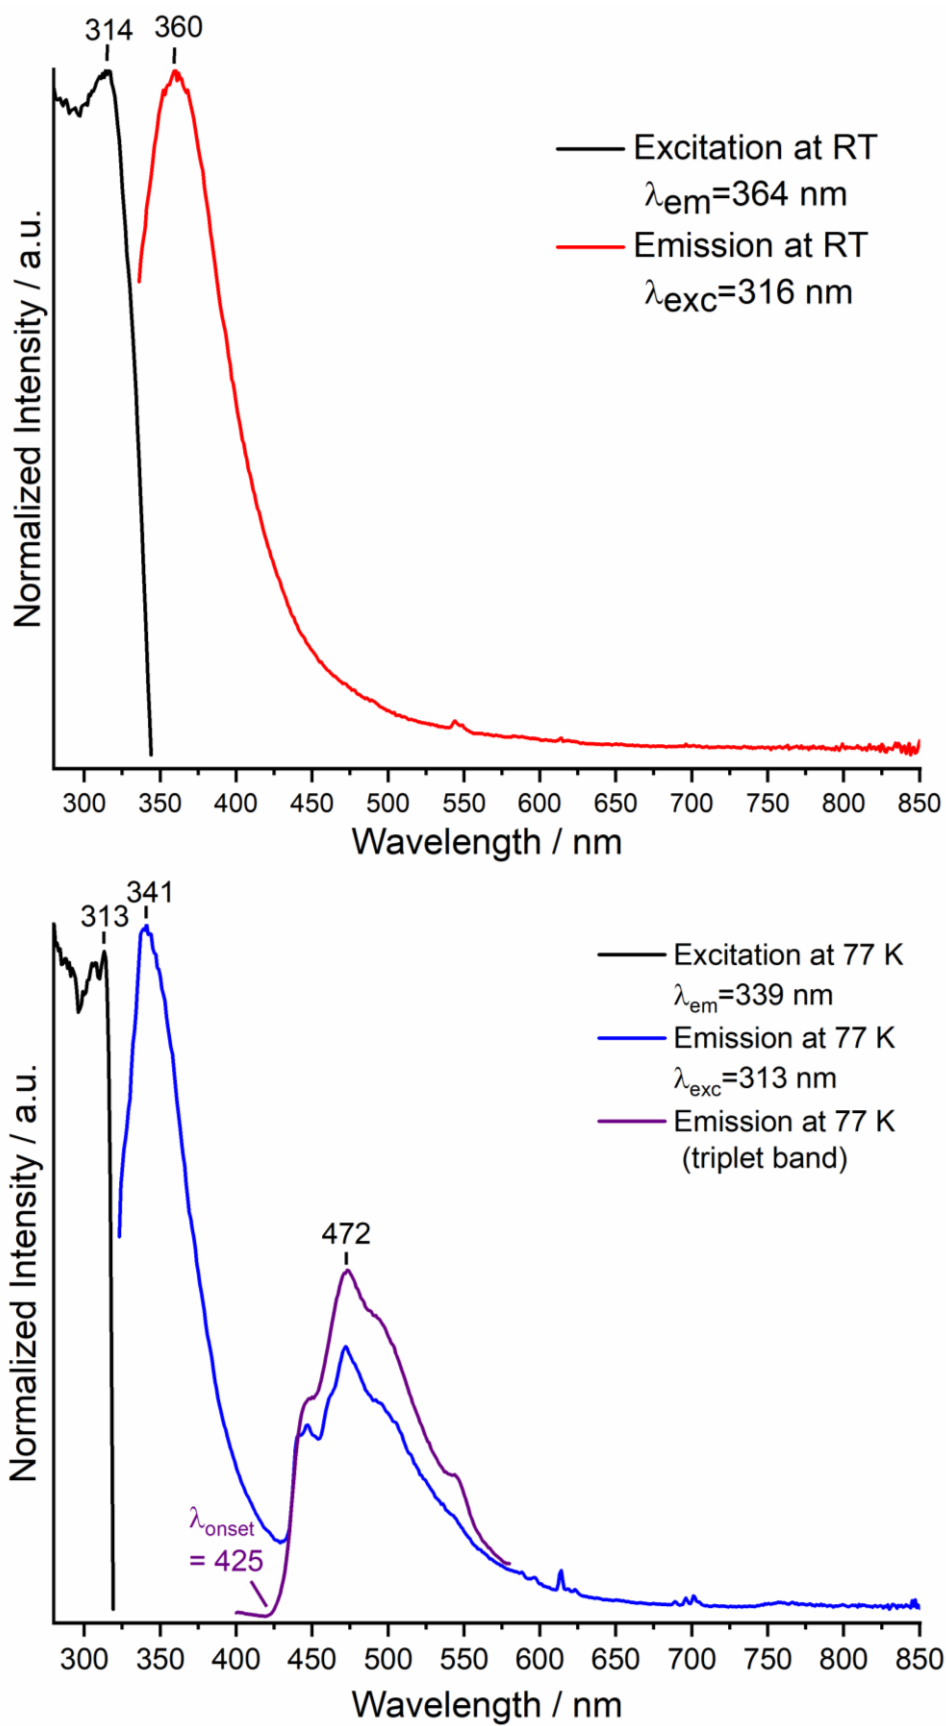

**Figure S26.** Normalized excitation and emission spectra of  $[La_2(2-PyPzH)_4Cl_6]$  (1) at room temperature (top) and 77 K (bottom). Wavelengths at which the spectra were recorded are reported in the legends.

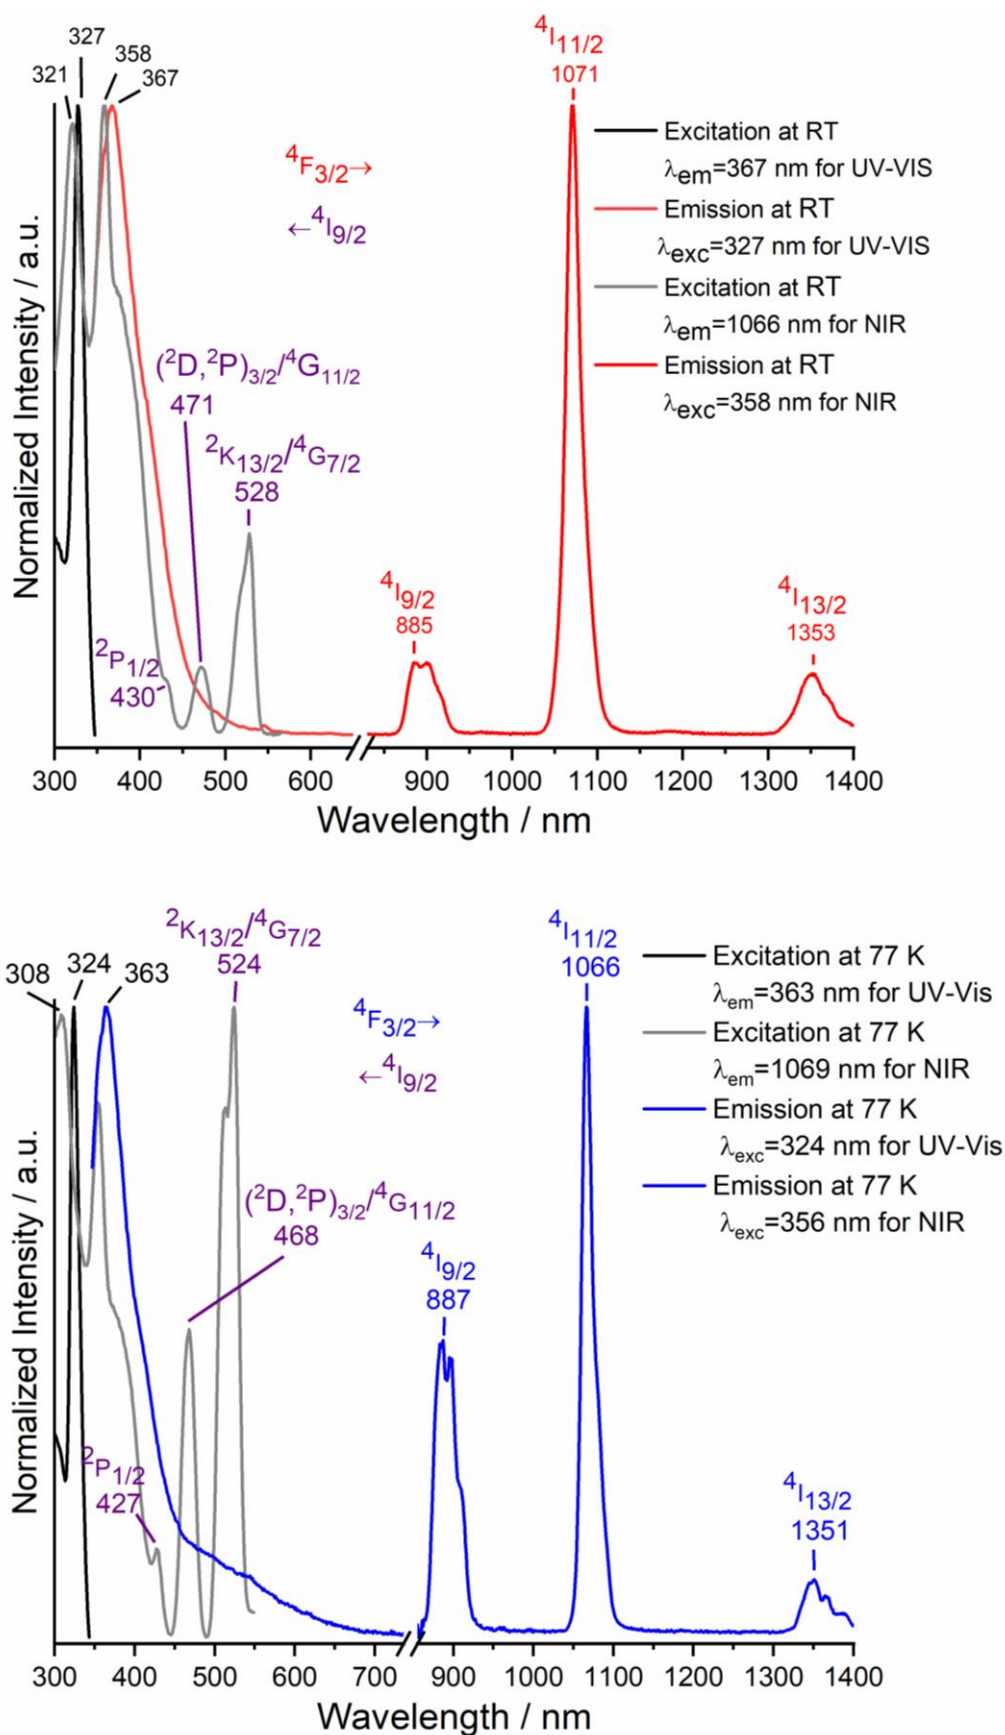

**Figure S27.** Normalized excitation and emission spectra of  $[\text{Nd}_2(2\text{-PyPzH})_4\text{Cl}_6]$  (2) at room temperature (top) and 77 K (bottom). Wavelengths at which the spectra were recorded are reported in the legends.

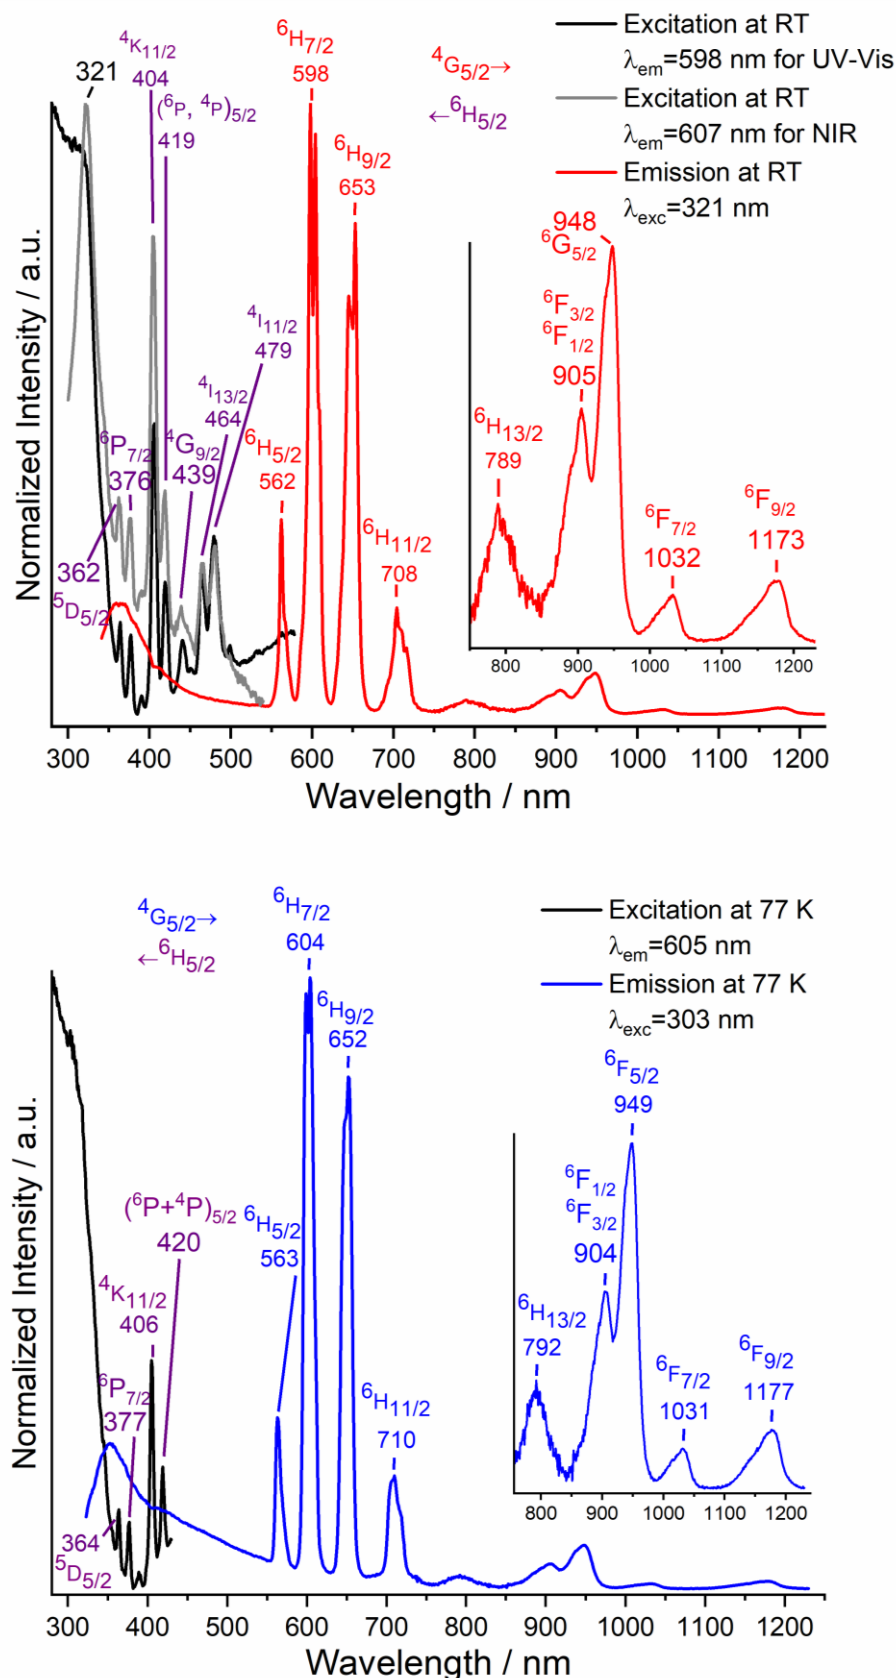

**Figure S28.** Normalized excitation and emission spectra of  $[\text{Sm}_2(2\text{-PyPzH})_4\text{Cl}_6]$  (3) at room temperature (top) and 77 K (bottom). Wavelengths at which the spectra were recorded are reported in the legends. Visible and NIR range emission spectra were brought to the same intensity at 708 (at RT) and 710 nm (at 77 K).

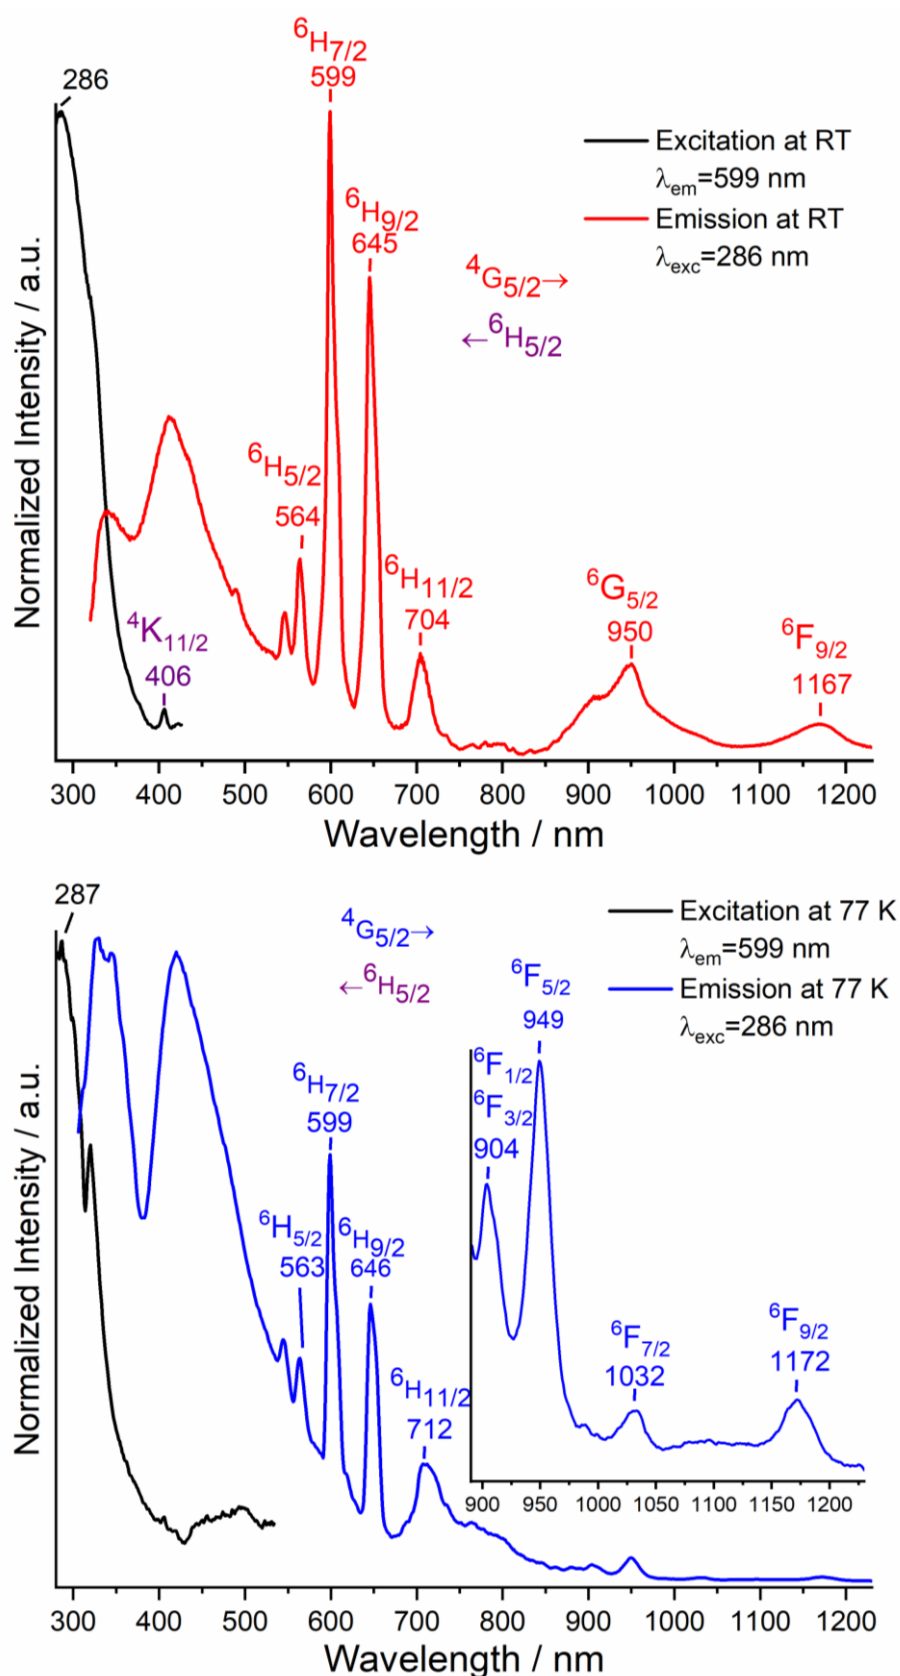

**Figure S29.** Normalized excitation and emission spectra of  $\alpha$ -[Sm<sub>2</sub>(2-PyPzH)<sub>4</sub>Cl<sub>6</sub>] (4) at room temperature (top) and 77 K (bottom). Wavelengths at which the spectra were recorded are reported in the legends. Visible and NIR range emission spectra were brought to the same intensity at 704 (at RT) and 712 nm (at 77 K).

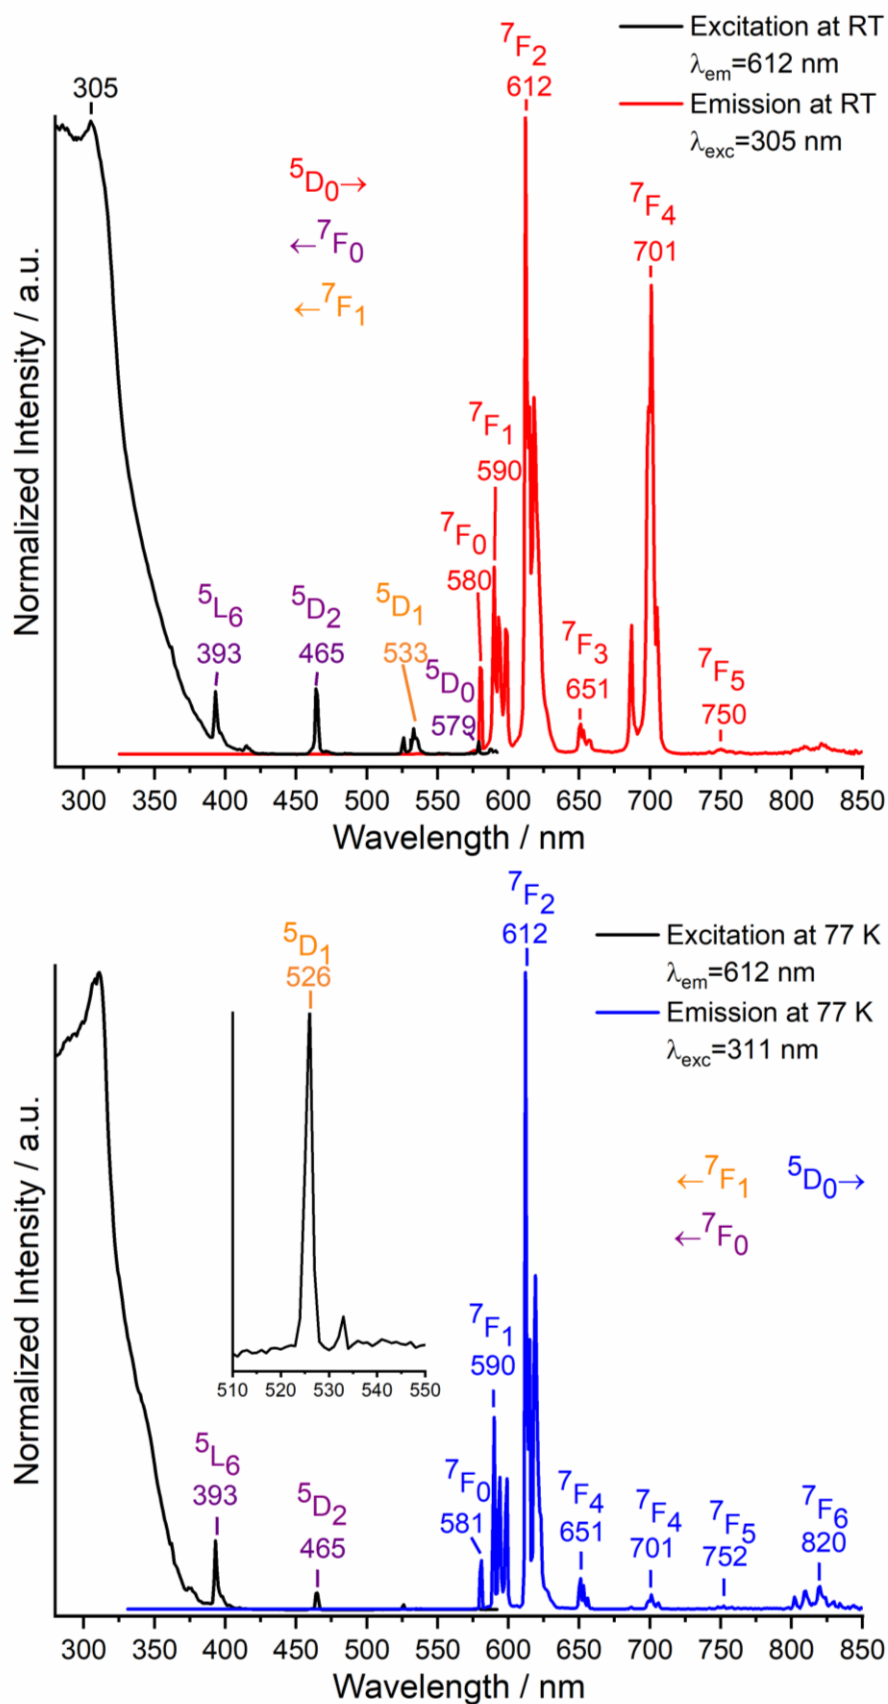

**Figure S30.** Normalized excitation and emission spectra of  $\alpha$ -[Eu<sub>2</sub>(2-PyPzH)<sub>4</sub>Cl<sub>6</sub>] (5) at room temperature (top) and 77 K (bottom). Wavelengths at which the spectra were recorded are reported in the legends.

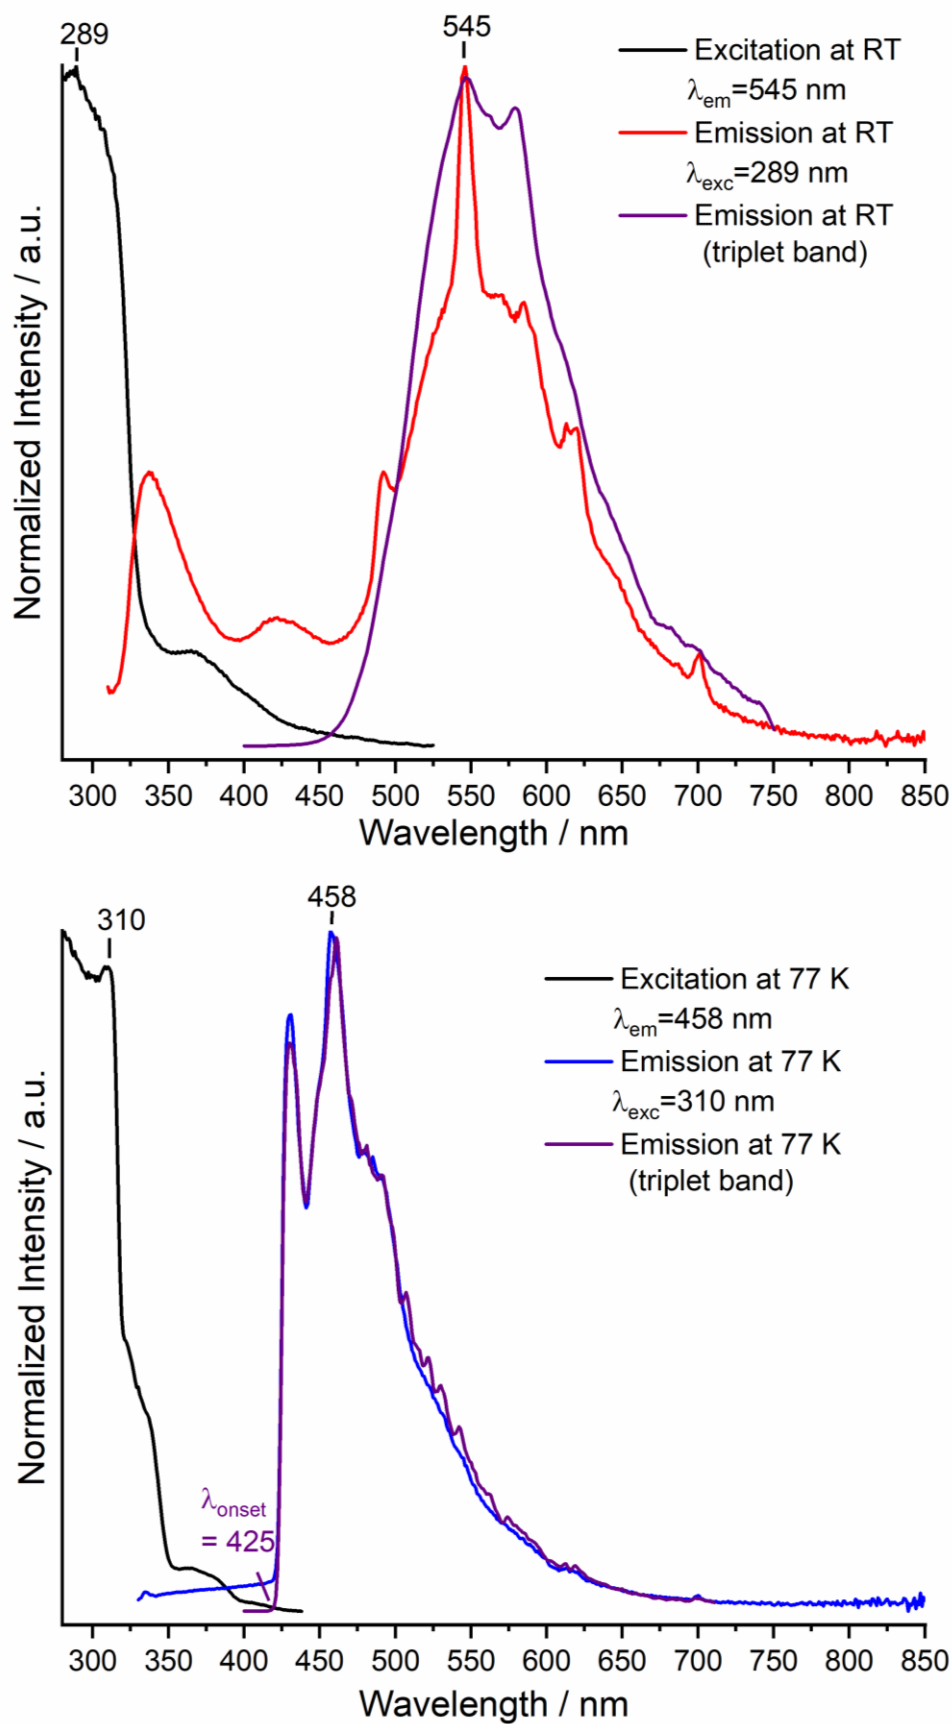

**Figure S31.** Normalized excitation and emission spectra of  $\alpha$ -[Gd<sub>2</sub>(2-PyPzH)<sub>4</sub>Cl<sub>6</sub>] (6) at room temperature (top) and 77 K (bottom). Wavelengths at which the spectra were recorded are reported in the legends.

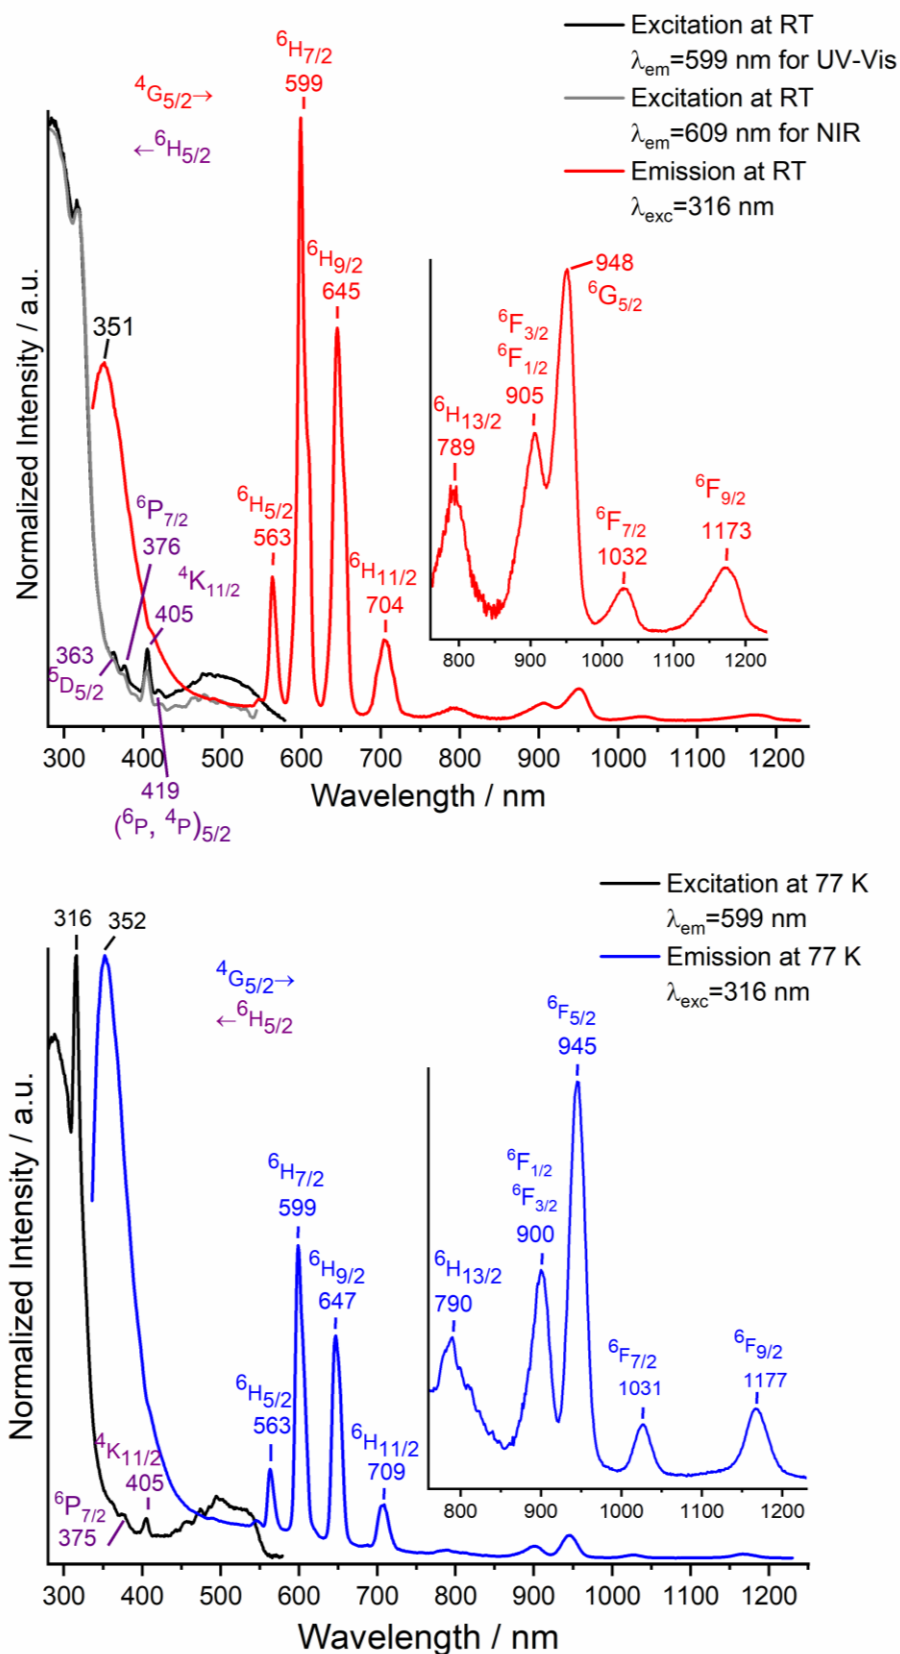

**Figure S32.** Normalized excitation and emission spectra of  $\beta$ -[Sm<sub>2</sub>(2-PyPzH)<sub>4</sub>Cl<sub>6</sub>] (8) at room temperature (top) and 77 K (bottom). Wavelengths at which the spectra were recorded are reported in the legends. Visible and NIR range emission spectra were brought to the same intensity at 704 (at RT) and 709 (at 77 K) nm.

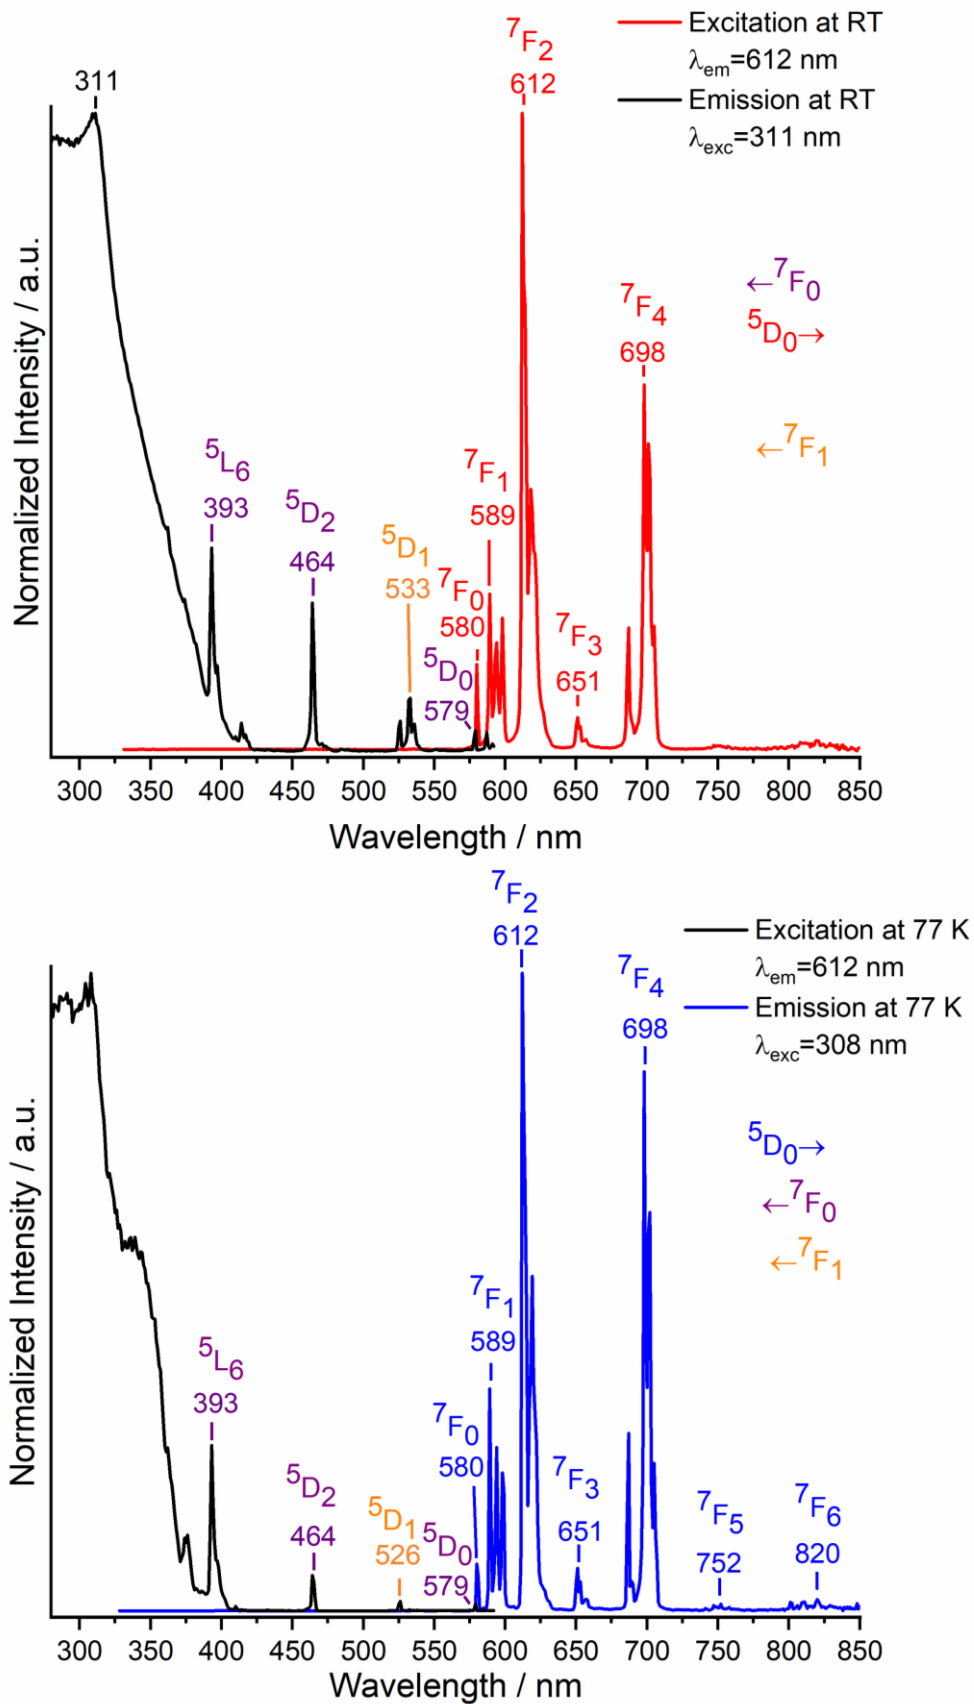

**Figure S33.** Normalized excitation and emission spectra of  $\beta$ -[Eu<sub>2</sub>(2-PyPzH)<sub>4</sub>Cl<sub>6</sub>] (9) at room temperature (top) and 77 K (bottom). Wavelengths at which the spectra were recorded are reported in the legends.

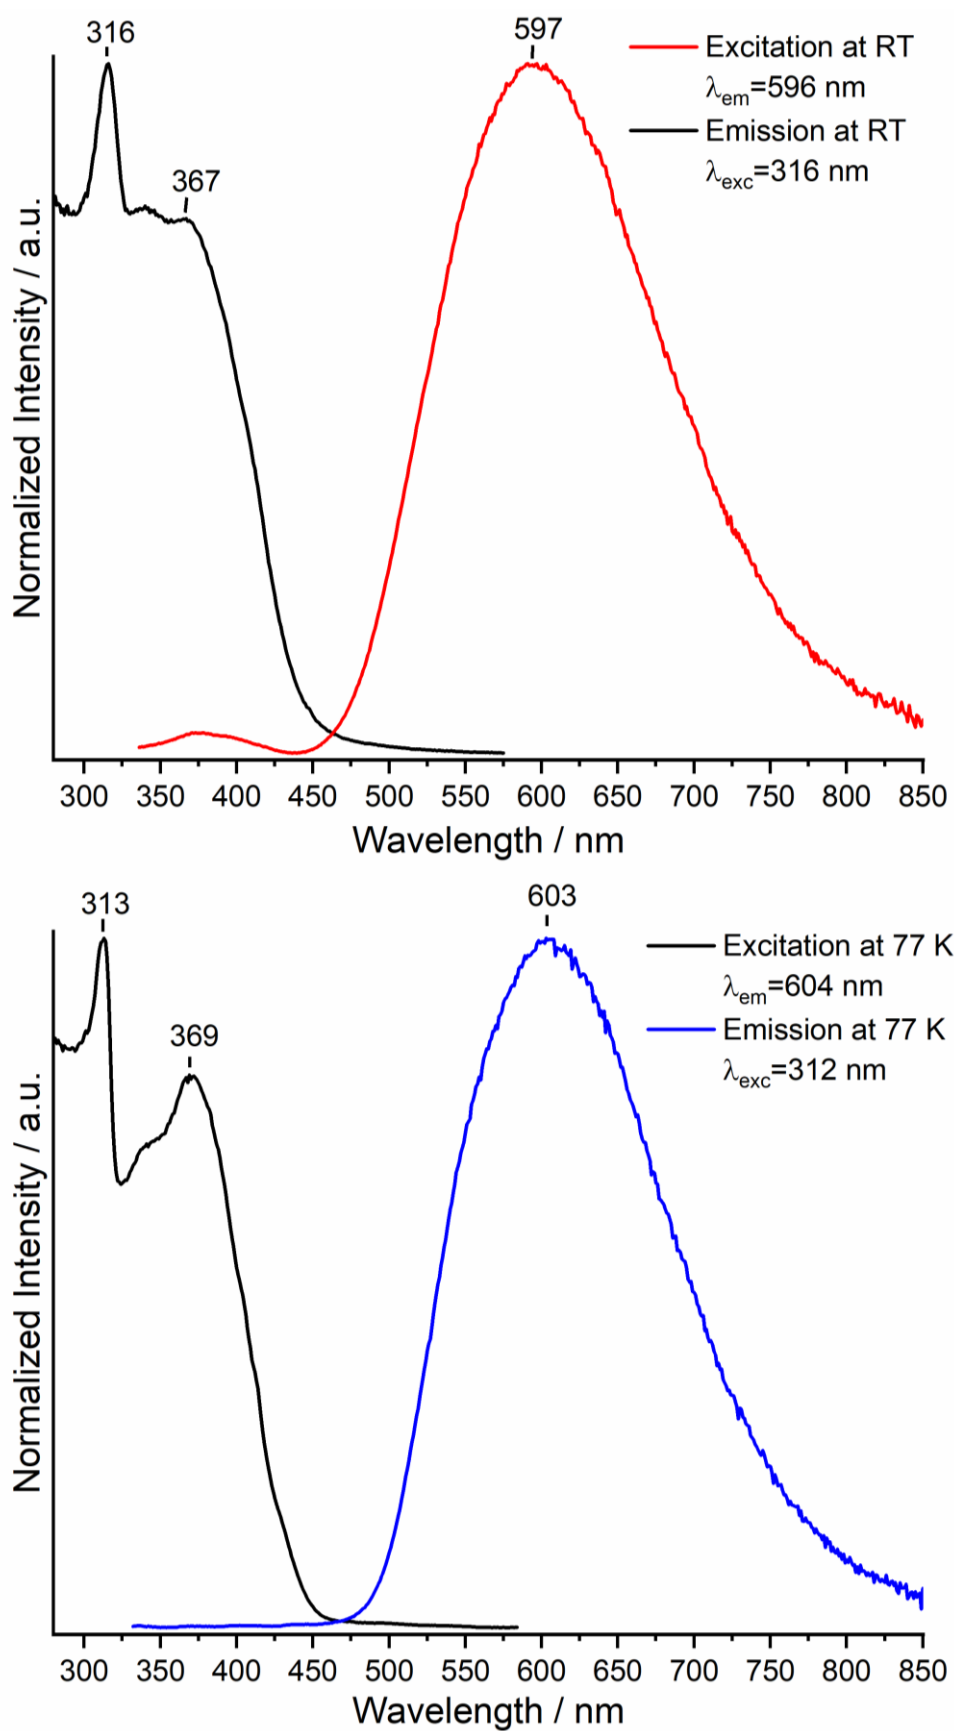

**Figure S34.** Normalized excitation and emission spectra of [Ce(2-PyPzH)<sub>3</sub>Cl<sub>3</sub>] (**11**) at room temperature (top) and 77 K (bottom). Wavelengths at which the spectra were recorded are reported in the legends.

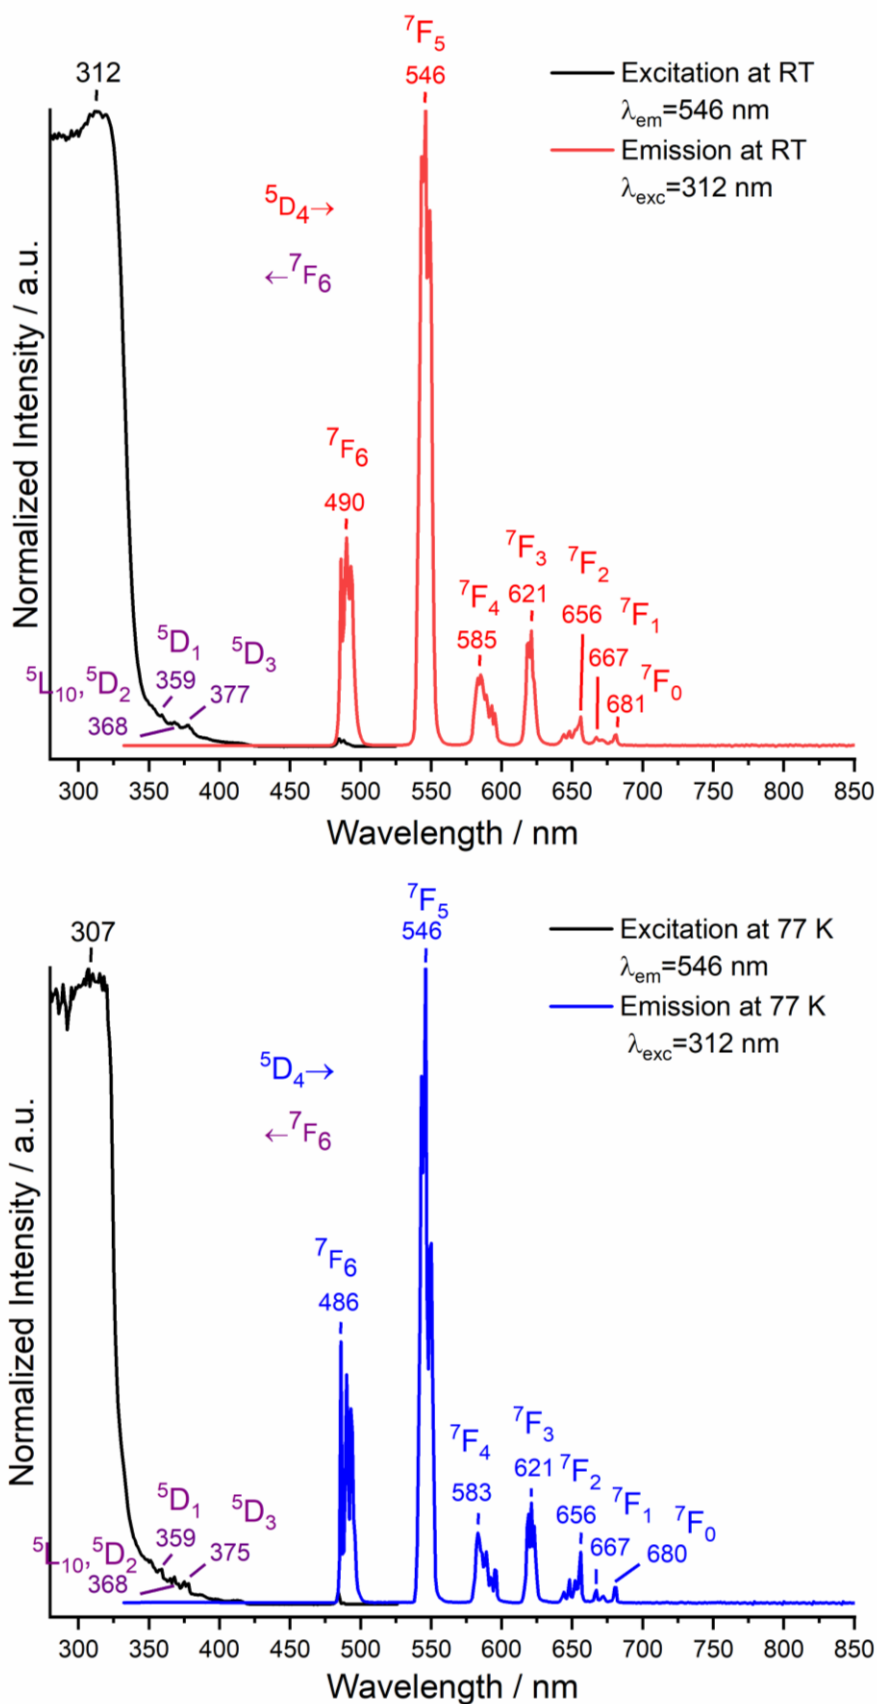

**Figure S35.** Normalized excitation and emission spectra of  $[\text{Tb}(\text{2-PyPzH})_2\text{Cl}_3]$  (**12**) at room temperature (top) and 77 K (bottom). Wavelengths at which the spectra were recorded are reported in the legends.

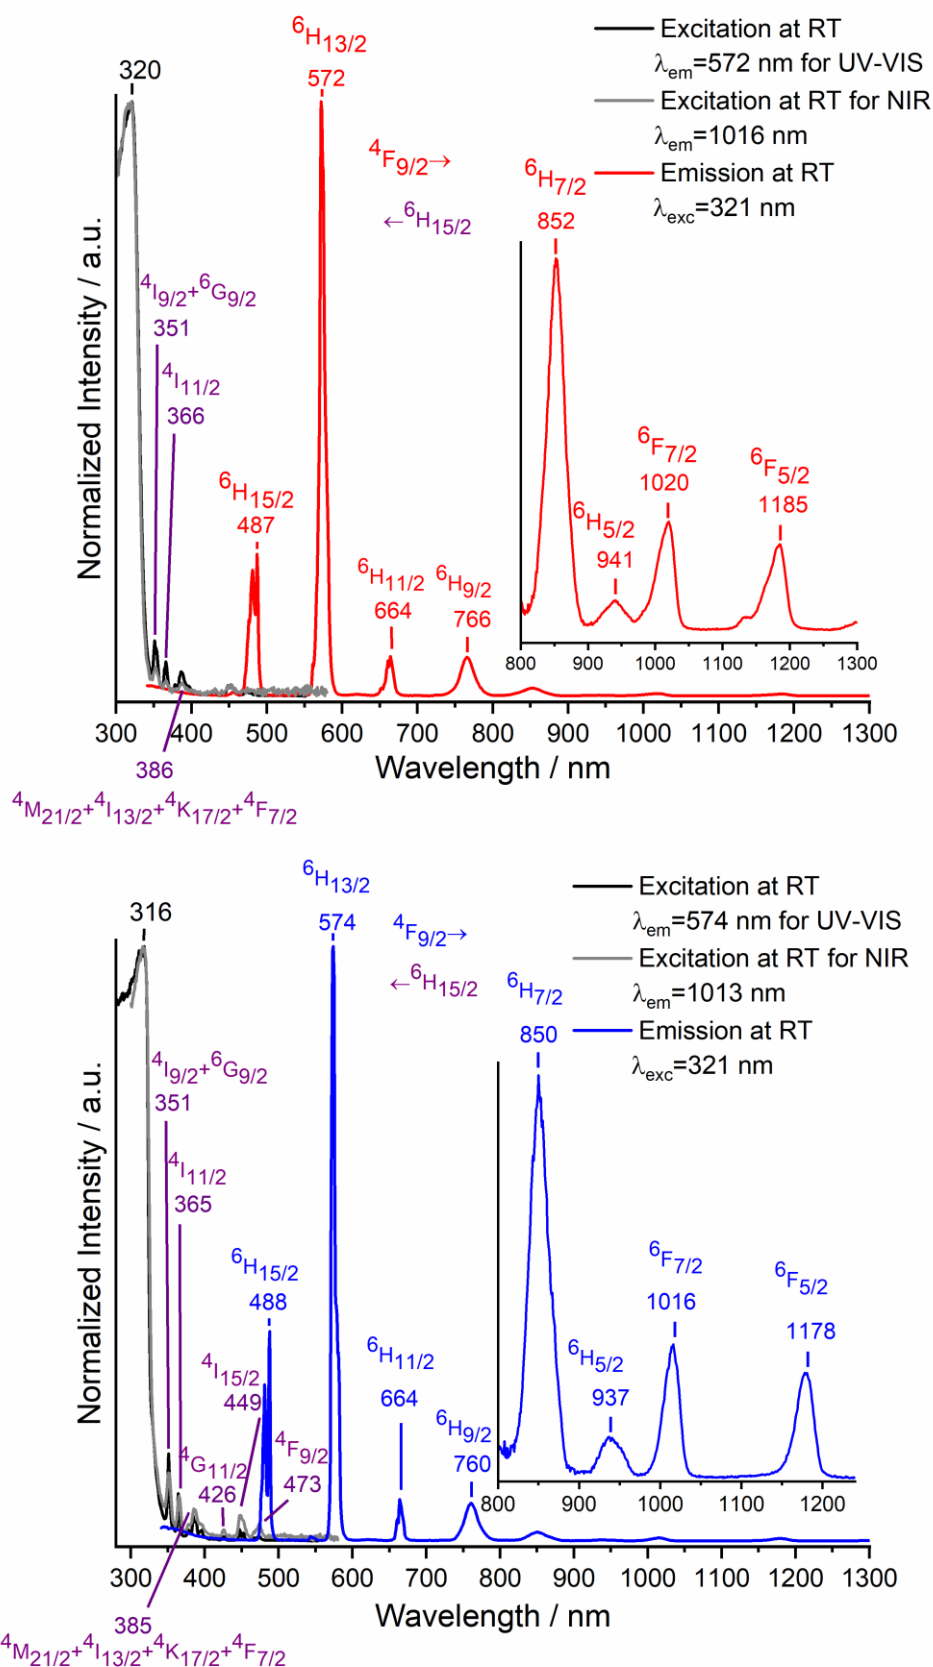

**Figure S36.** Normalized excitation and emission spectra of [Dy(2-PyPzH)<sub>2</sub>Cl<sub>3</sub>] (13) at room temperature (top) and 77 K (bottom). Wavelengths at which the spectra were recorded are reported in the legends. Visible and NIR range emission spectra were brought to the same intensity at 766 (at RT) and 760 (at 77 K) nm.

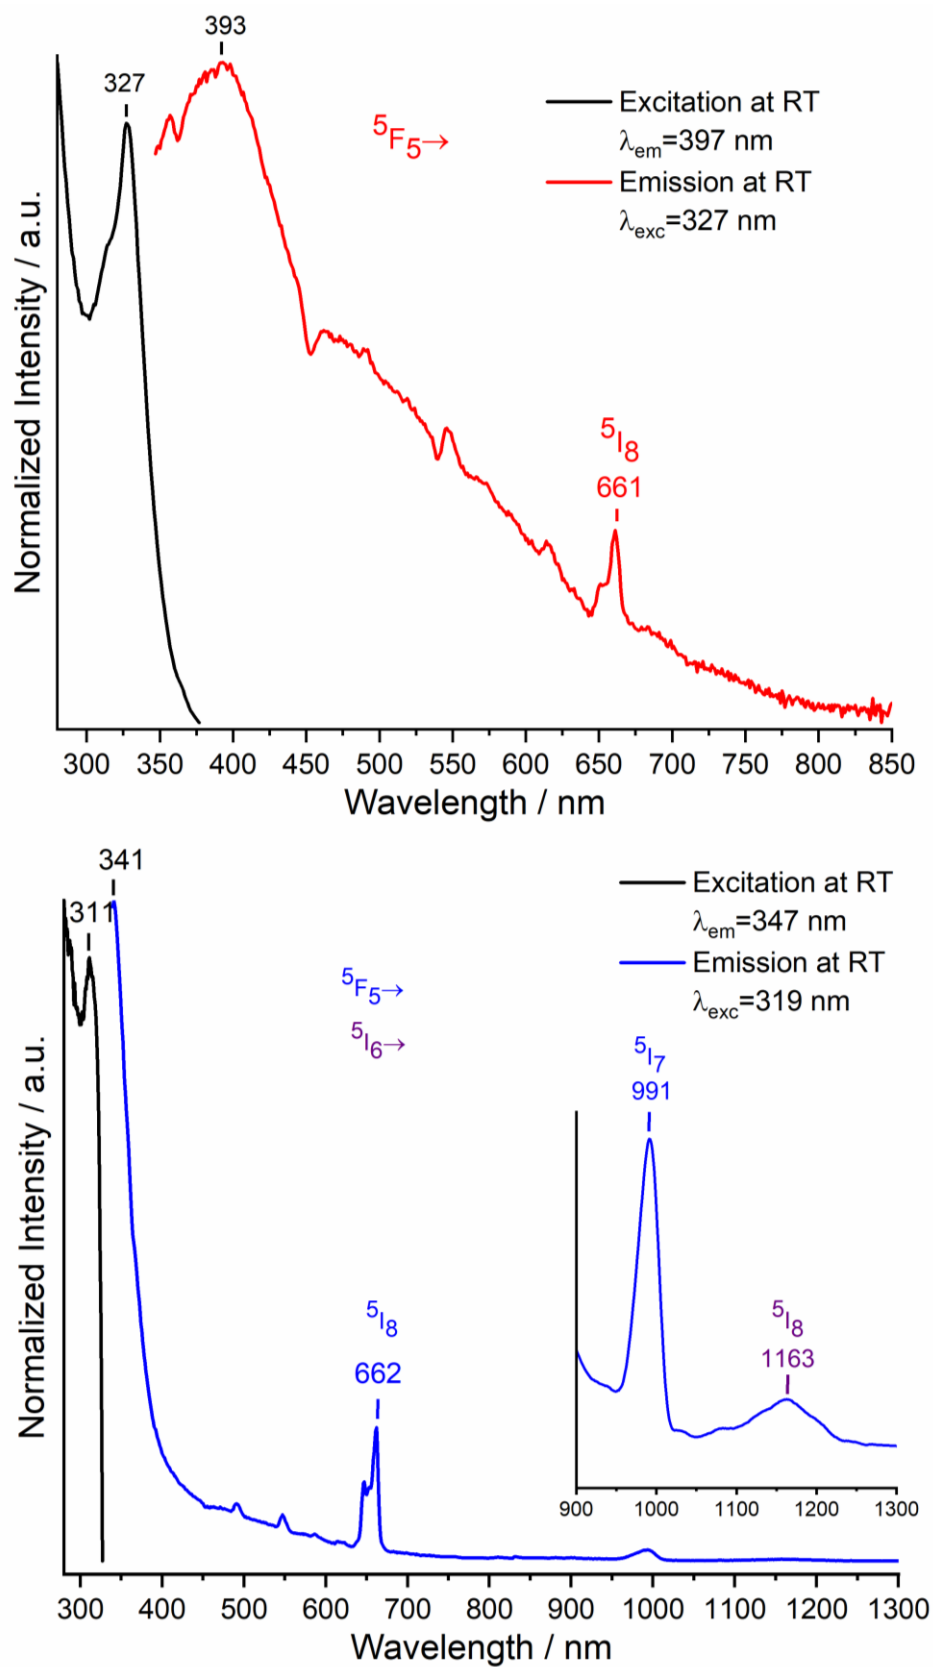

**Figure S37.** Normalized excitation and emission spectra of [Ho(2-PyPzH)<sub>2</sub>Cl<sub>3</sub>] (14) at room temperature (top) and 77 K (bottom). Wavelengths at which the spectra were recorded are reported in the legends. Visible and NIR range emission spectra were brought to the same intensity at 662 (at 77 K) nm.

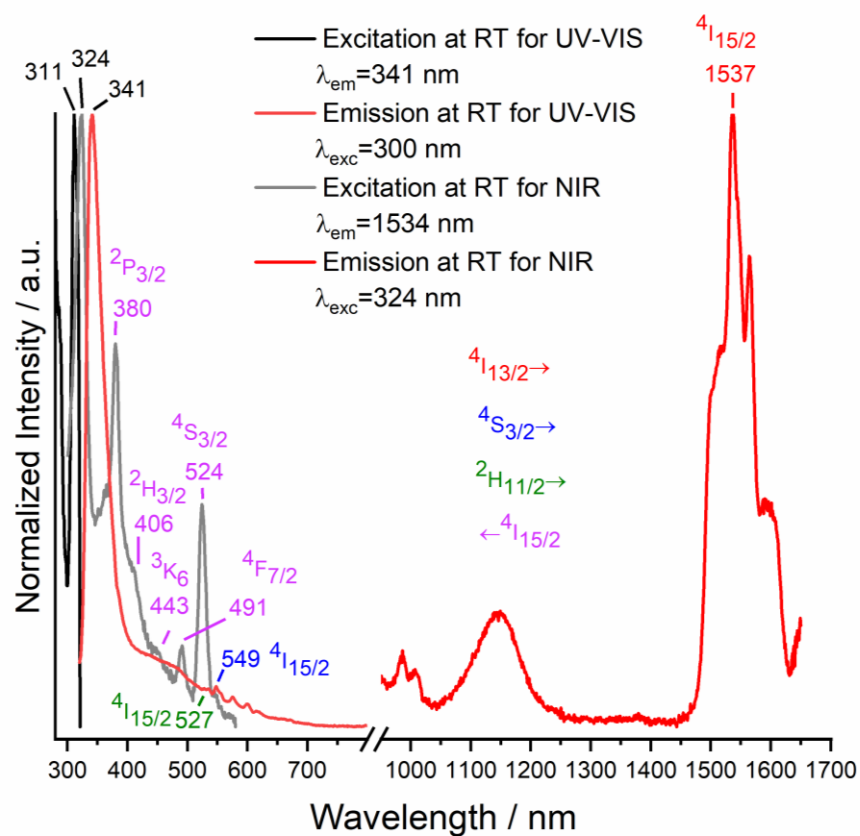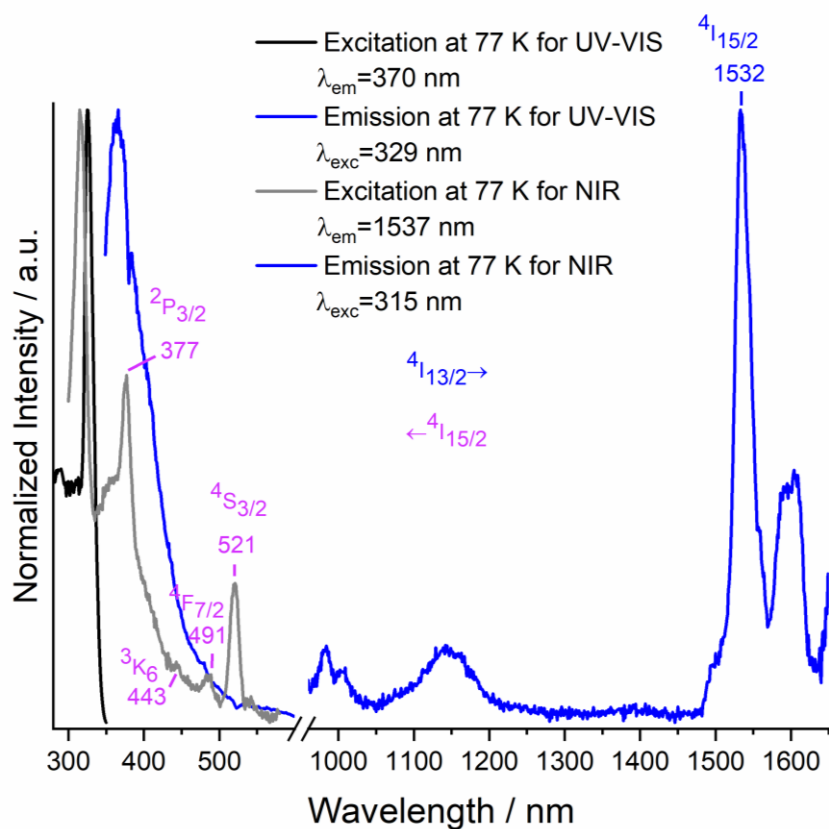

**Figure S38.** Normalized excitation and emission spectra of  $[\text{Er}(\text{2-PyPzH})_2\text{Cl}_3]$  (**15**) at room temperature (top) and 77 K (bottom). Wavelengths at which the spectra were recorded are reported in the legends.

## IR Spectra

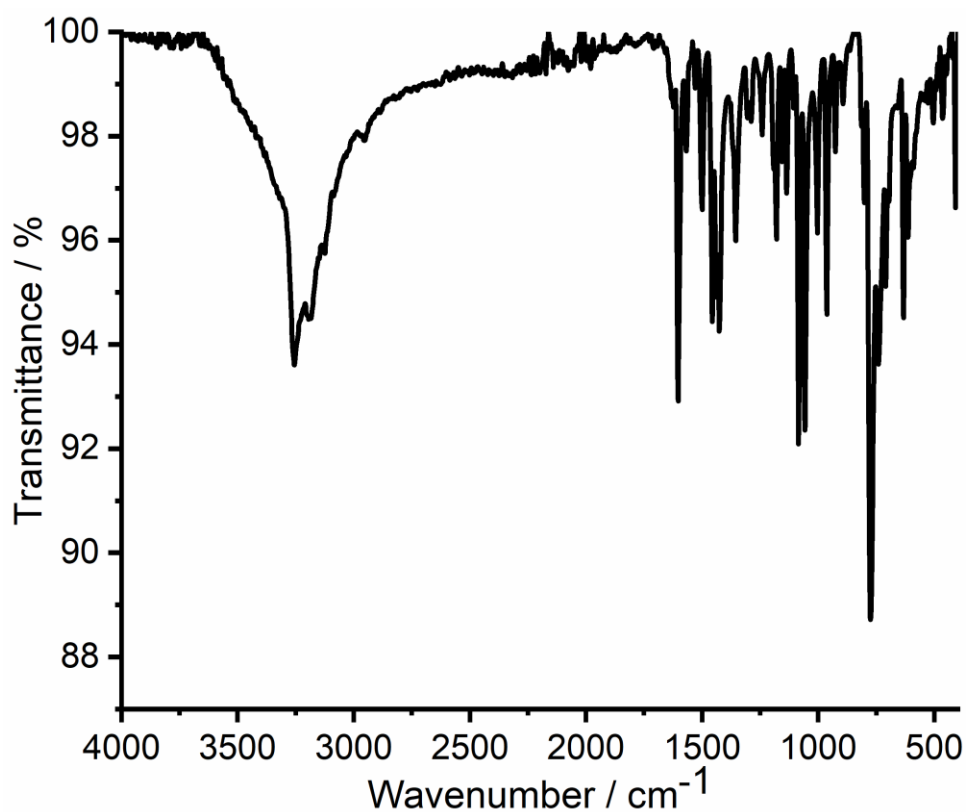

**Figure S39.** The infrared spectrum (ATR) of  $[La_2(2-PyPzH)_4Cl_6]$  (1).

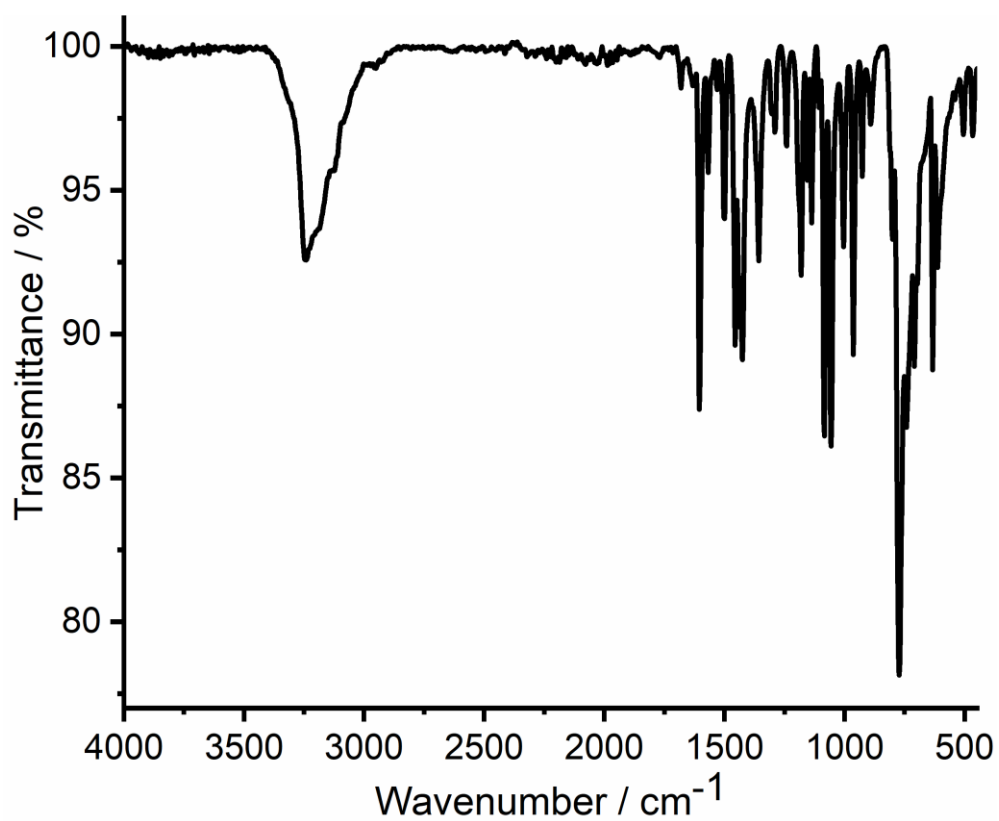

**Figure S40.** The infrared spectrum (ATR) of  $[Nd_2(2-PyPzH)_4Cl_6]$  (2).

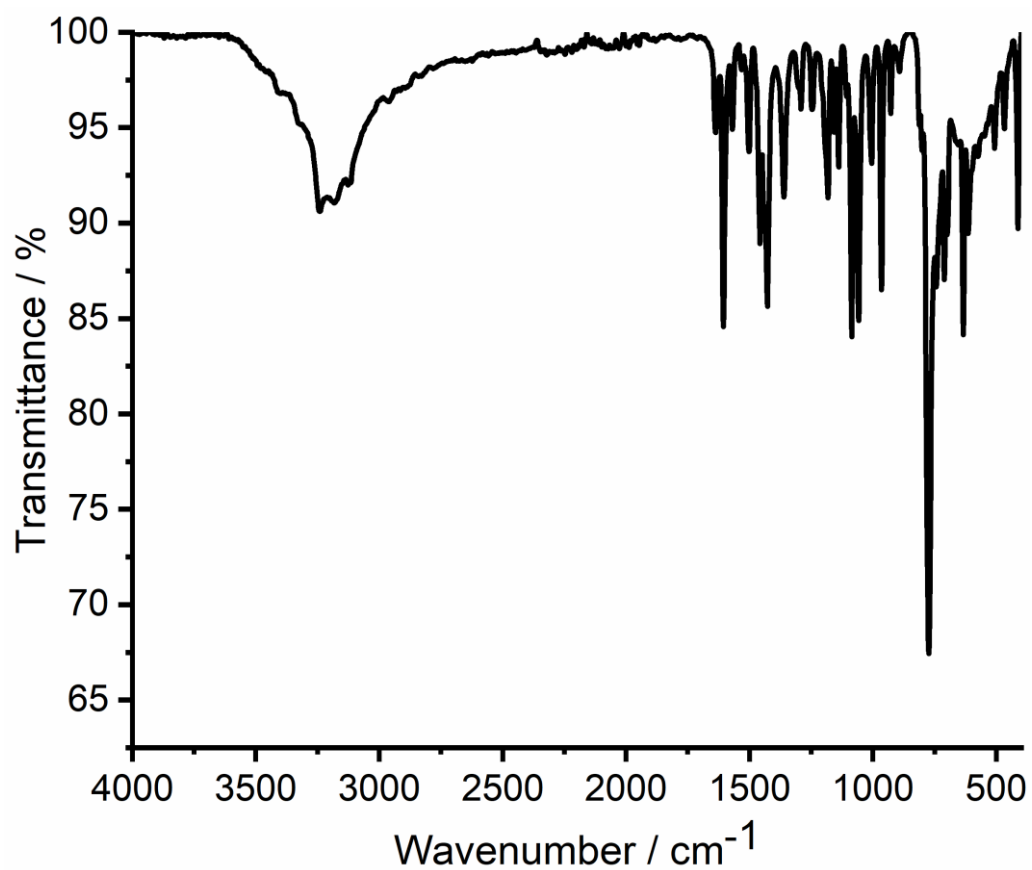

Figure S41. The infrared spectrum (ATR) of  $1\text{-}[\text{Sm}_2(2\text{-PyPzH})_4\text{Cl}_6]$  (3).

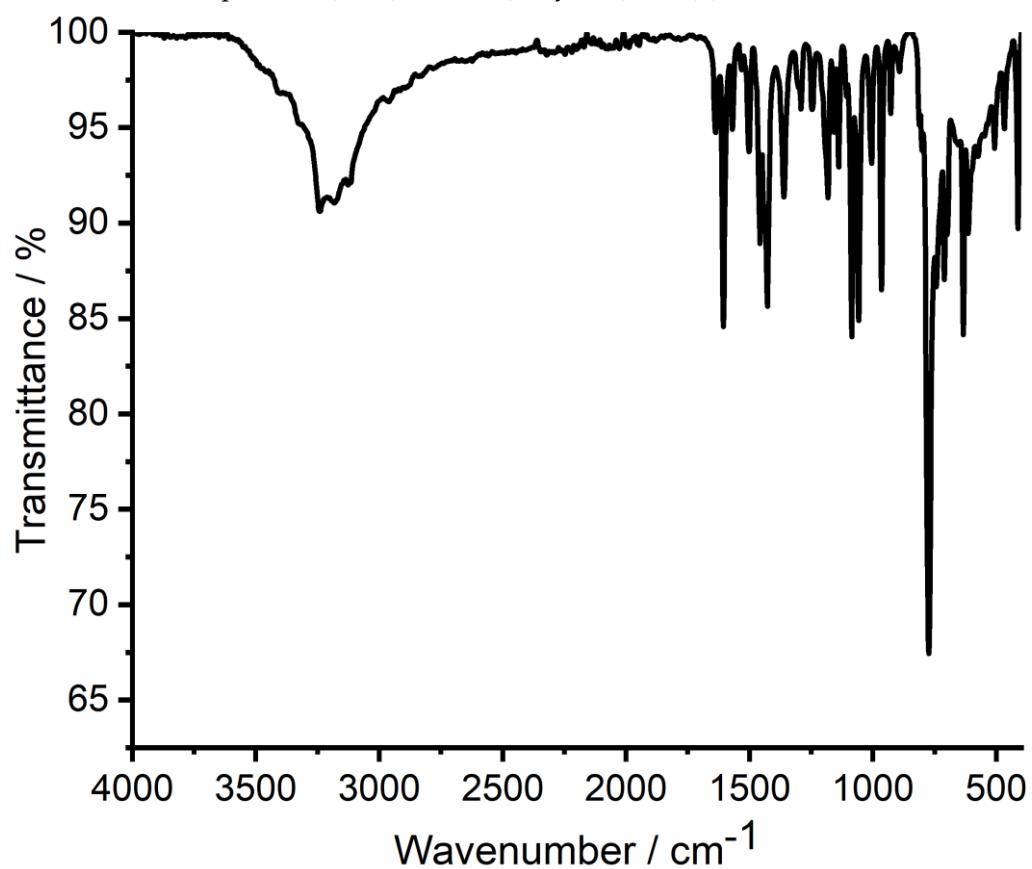

Figure S42. The infrared spectrum (ATR) of  $\alpha\text{-}[\text{Sm}_2(2\text{-PyPzH})_4\text{Cl}_6]$  (4).

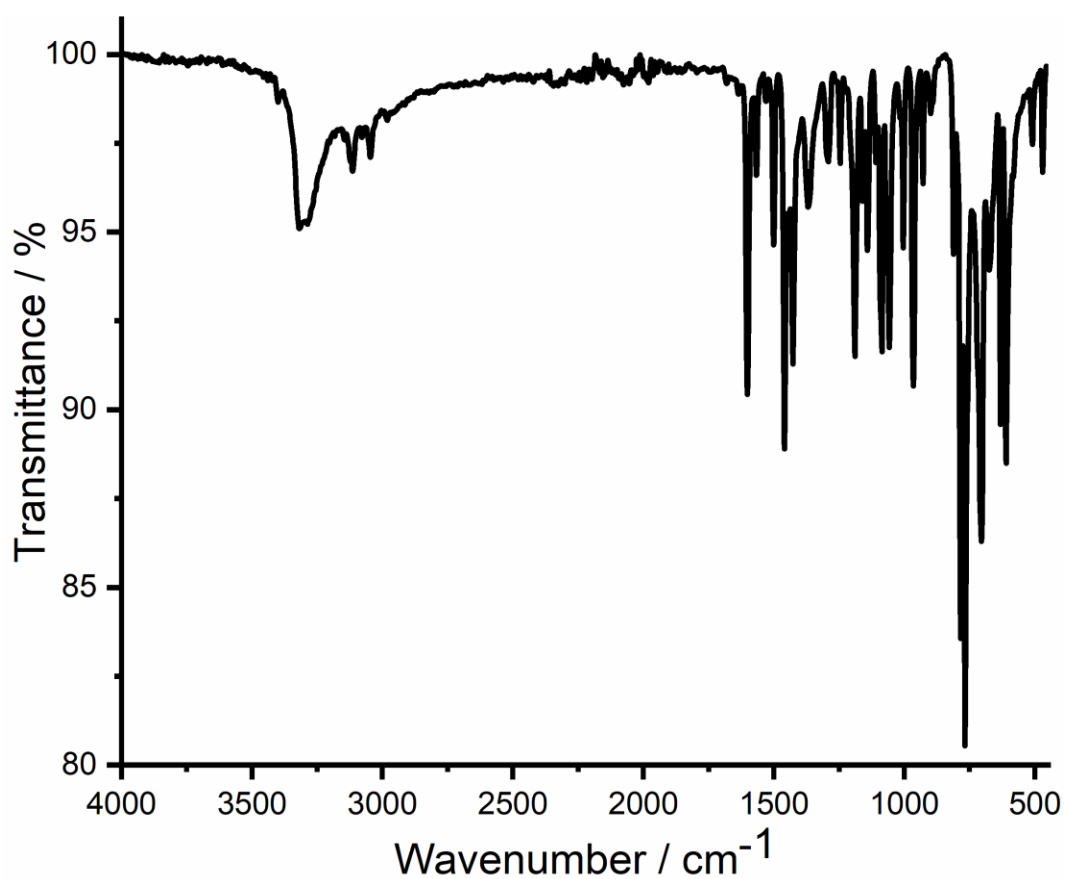

**Figure S43.** The infrared spectrum (ATR) of  $\alpha$ -[Eu<sub>2</sub>(2-PyPzH)<sub>4</sub>Cl<sub>6</sub>] (5).

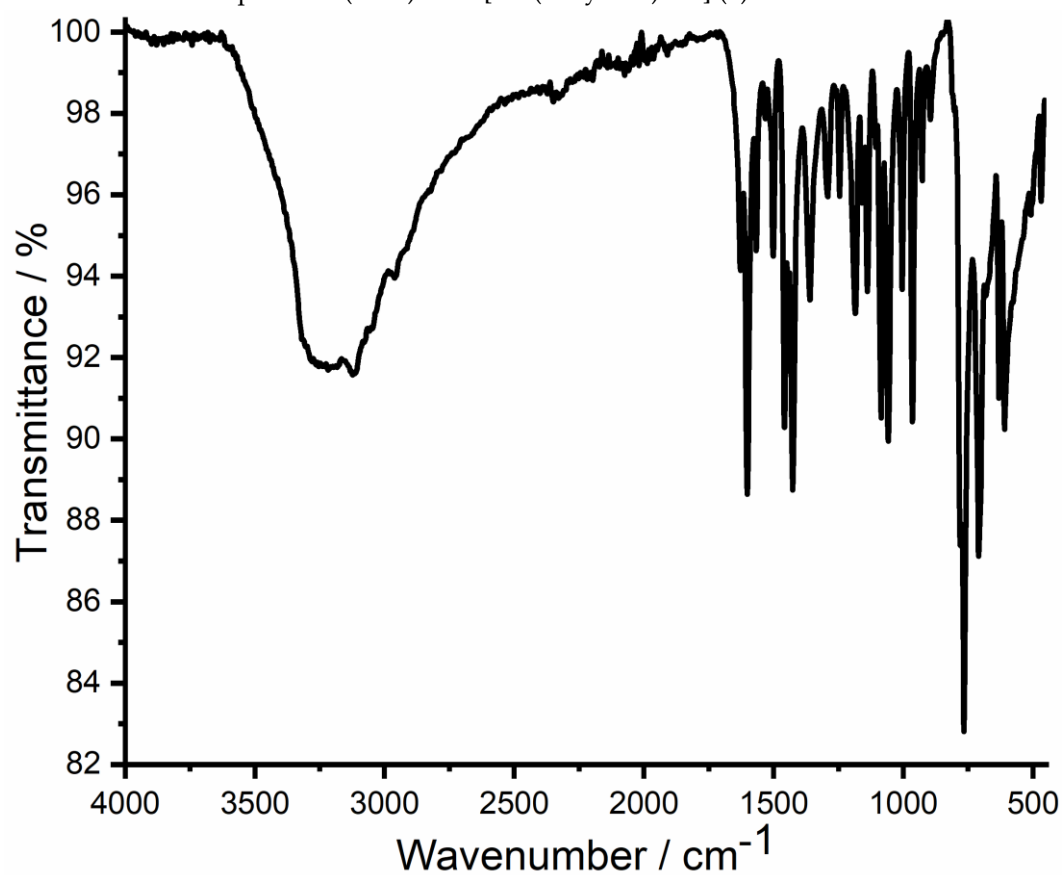

**Figure S44.** The infrared spectrum (ATR) of  $\alpha$ -[Gd<sub>2</sub>(2-PyPzH)<sub>4</sub>Cl<sub>6</sub>] (6).

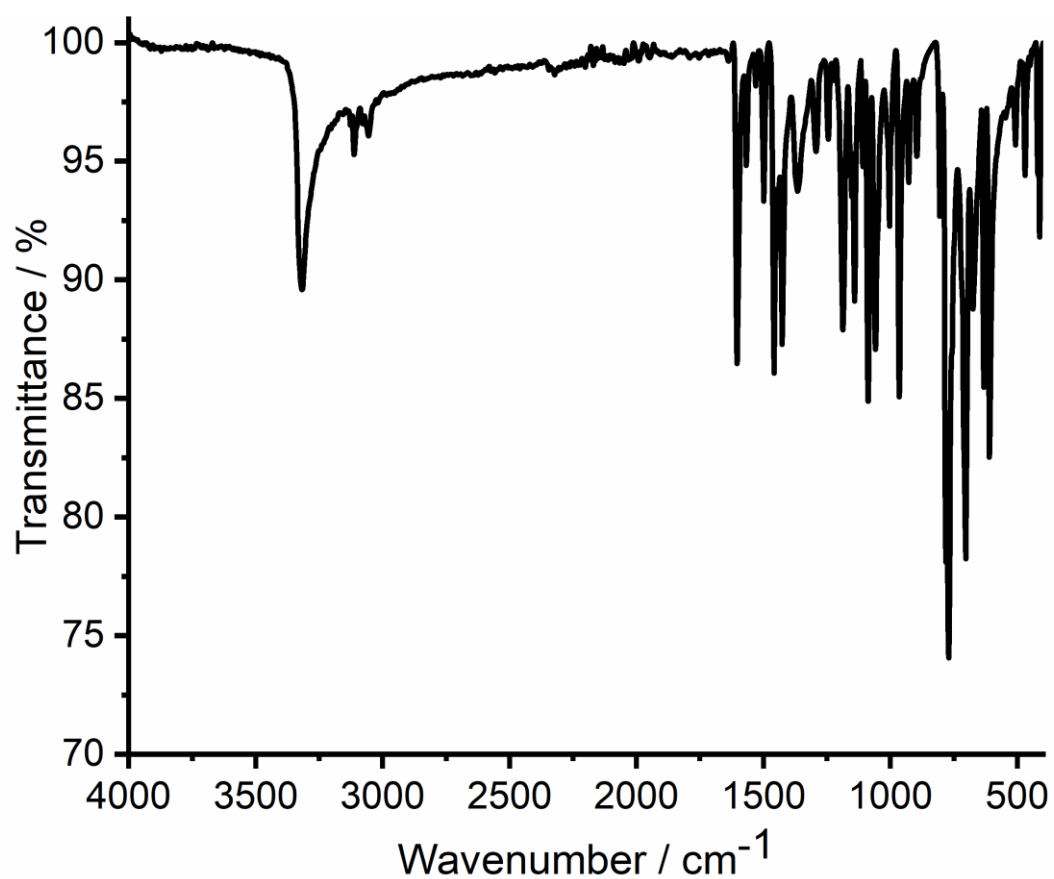

**Figure S45.** The infrared spectrum (ATR) of  $\beta$ -[Sm<sub>2</sub>(2-PyPzH)<sub>4</sub>Cl<sub>6</sub>] (8).

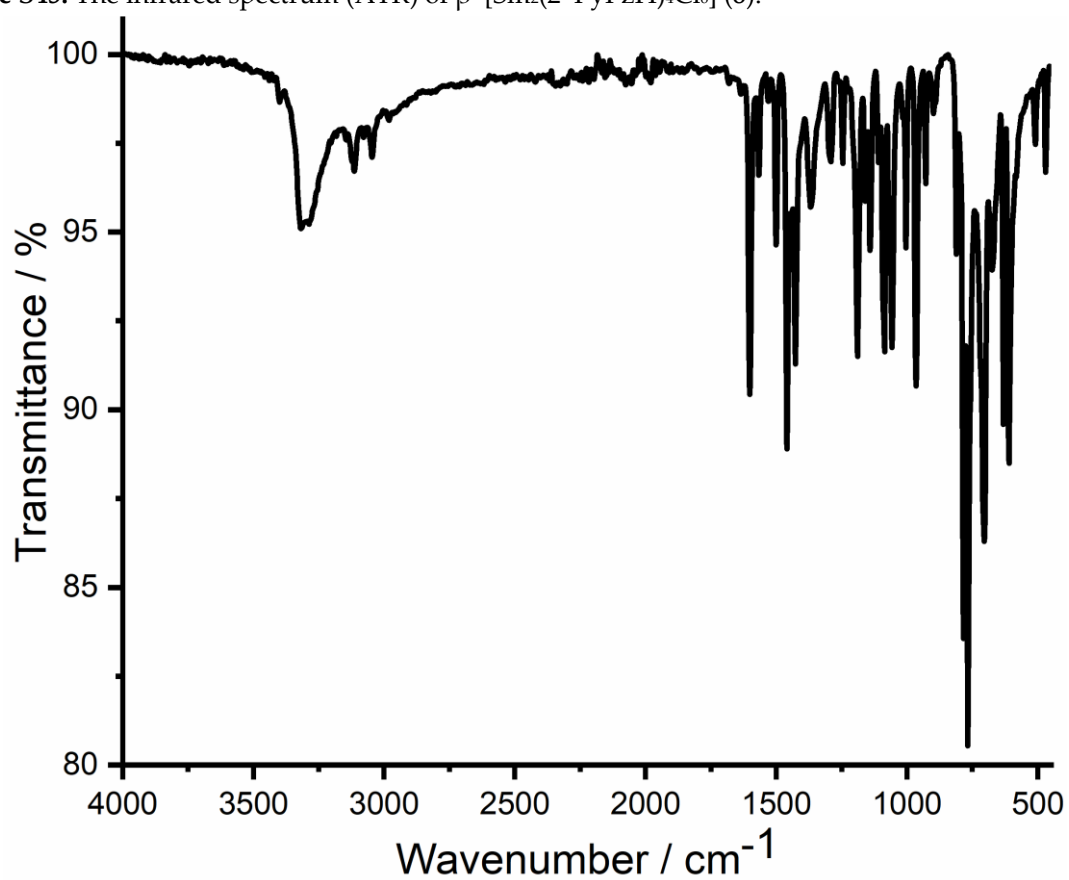

**Figure S46.** The infrared spectrum (ATR) of  $\beta$ -[Eu<sub>2</sub>(2-PyPzH)<sub>4</sub>Cl<sub>6</sub>] (9).

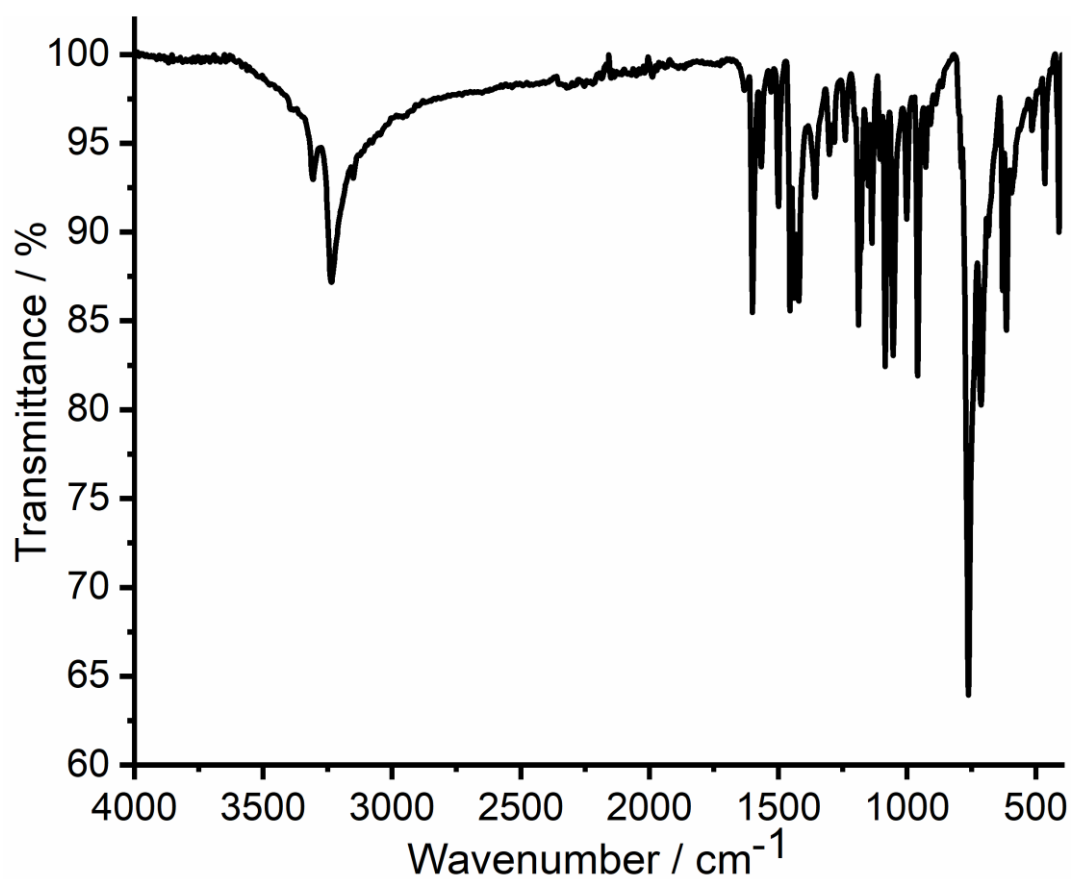

Figure S47. The infrared spectrum (ATR) of  $[\text{Ce}(\text{2-PyPzH})_3\text{Cl}_3]$  (11).

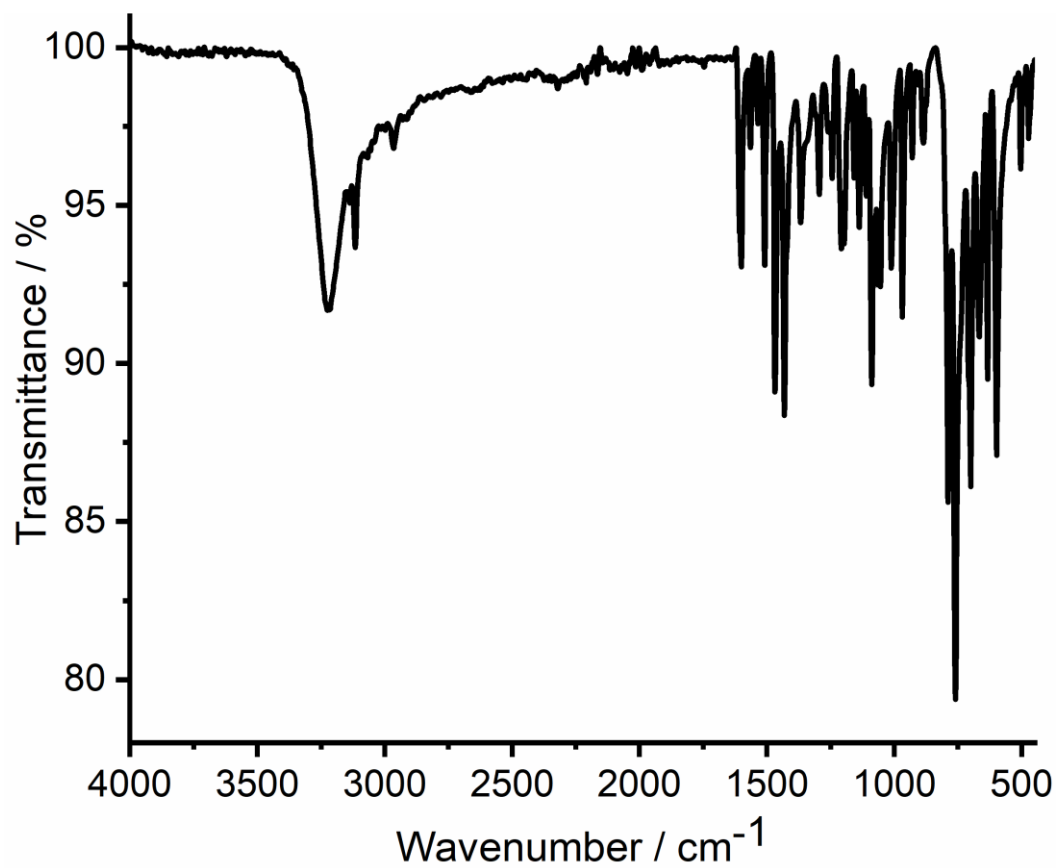

Figure S48. The infrared spectrum (ATR) of  $[\text{Tb}(\text{2-PyPzH})_2\text{Cl}_3]$  (12).

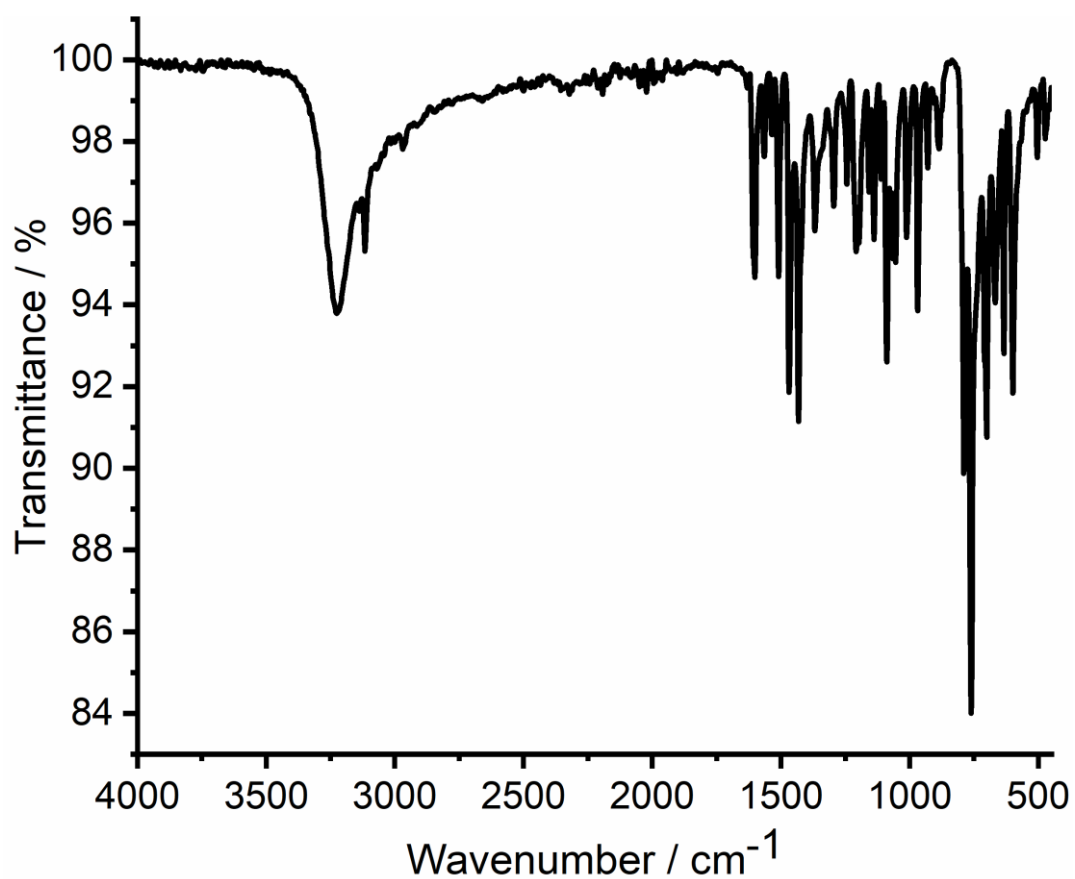

Figure S49. The infrared spectrum (ATR) of  $[\text{Dy}(\text{2-PyPzH})_2\text{Cl}_3]$  (**13**).

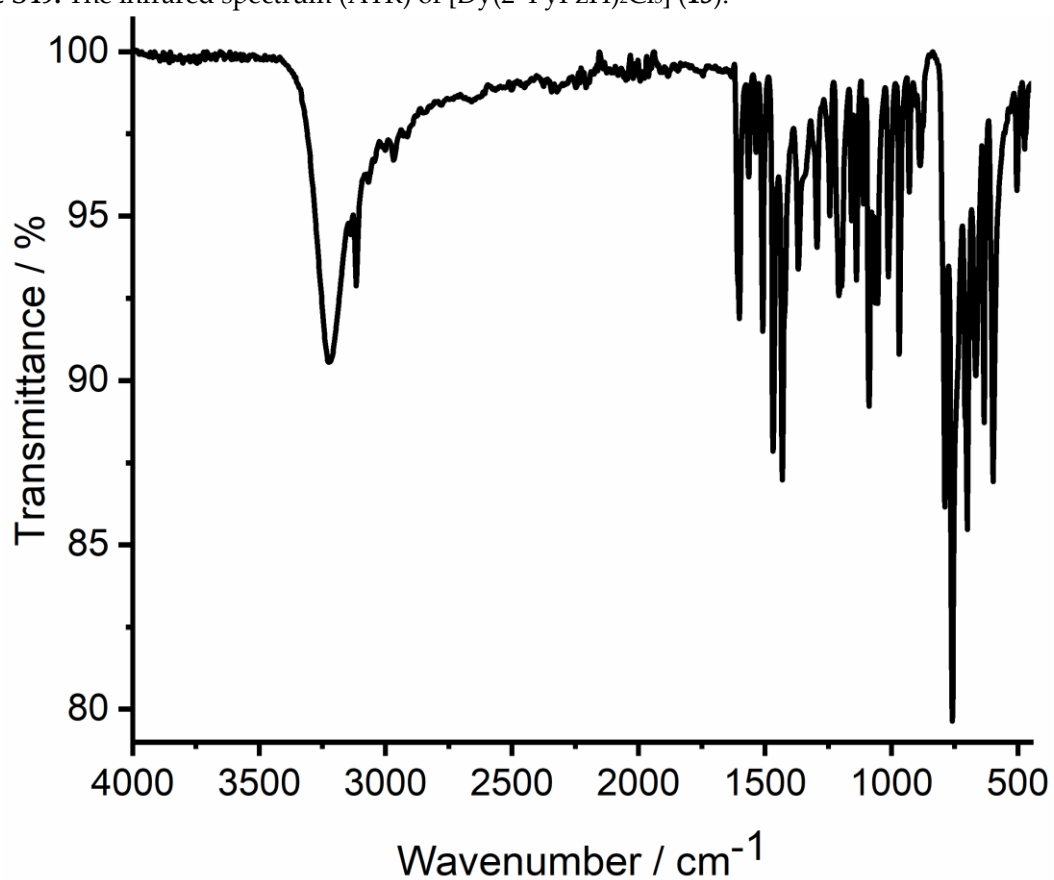

Figure S50. The infrared spectrum (ATR) of  $[\text{Ho}(\text{2-PyPzH})_2\text{Cl}_3]$  (**14**).

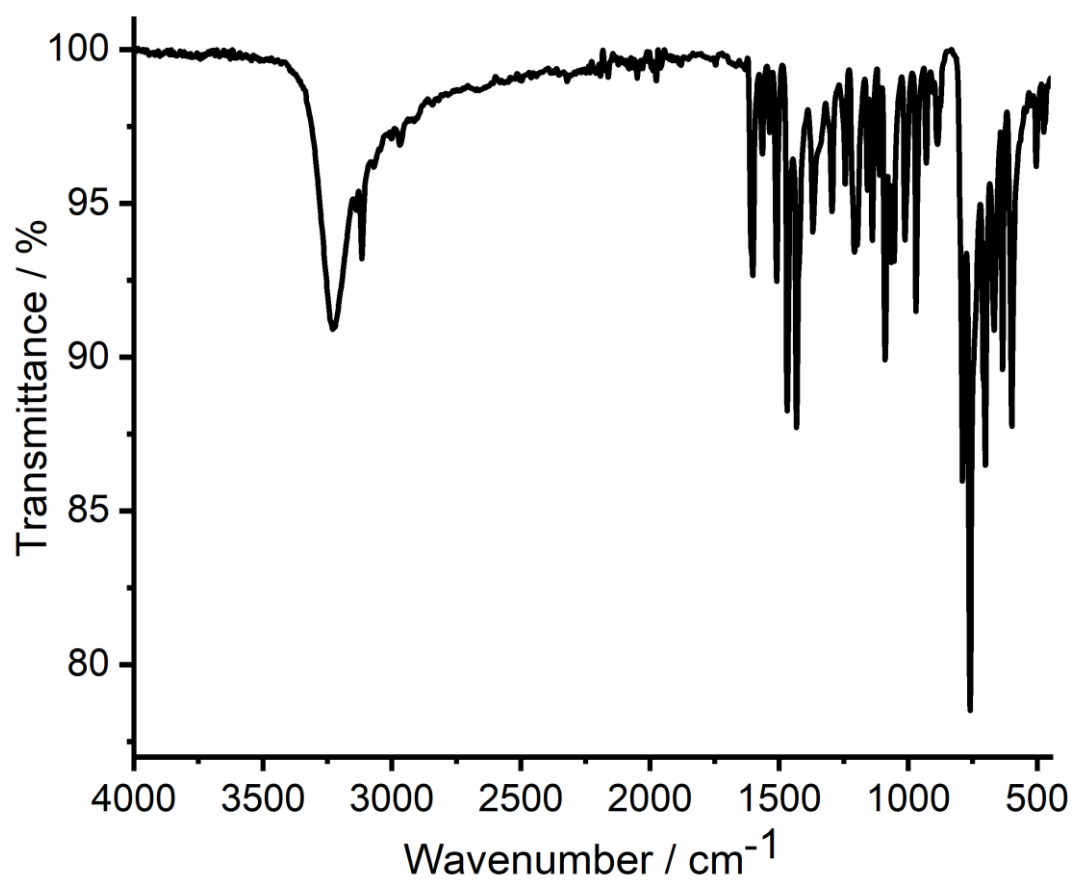

**Figure S51.** The infrared spectrum (ATR) of [Er(2-PyPzH)<sub>2</sub>Cl<sub>3</sub>] (**15**).
